# Supplementary material for: Oxidatively induced reactivity in Rh(iii)-catalyzed 7-azaindole synthesis: insights into the role of the silver additive
Source: Royal Society of Chemistry journal article supplement (doi:10.1039/d2sc01650h), 2022-01-01
Supplement: d2sc01650h1.pdf [file d2sc01650h1.pdf]

## *Electronic Supplementary Information*

### **Oxidatively Induced Reactivity in Rh(III)-Catalyzed 7-Azaindole Synthesis: Insights into the Role of the Silver Additive**

Ho Ryu,<sup>a,b</sup> Bimal Pudasaini,<sup>b</sup> Dasol Cho,<sup>a,b</sup> Sungwoo Hong,<sup>b,a,\*</sup> and Mu-Hyun Baik<sup>b,a,\*</sup>

<sup>a</sup>Department of Chemistry, Korea Advanced Institute of Science and Technology (KAIST), Daejeon 34141, Republic of Korea

<sup>b</sup>Center for Catalytic Hydrocarbon Functionalizations, Institute for Basic Science (IBS), Daejeon 34141, Republic of Korea

### **Tables of Contents**

|                                                                                                                                  |    |
|----------------------------------------------------------------------------------------------------------------------------------|----|
| Computational Results                                                                                                            | 2  |
| Figure S1. Energy profile of carbonic acid decomposition pathway.                                                                | 2  |
| Figure S2. The frontier orbitals of 6A, 6A-TS, and 7A.                                                                           | 3  |
| Figure S3. Comparison of DFT-optimized geometries of 3-TS, 3A-TS, and 3B-TS.                                                     | 3  |
| Table S1. Overall barriers of neutral, oxidized, and Ag(pyridine)-coordinated Rh complexes.                                      | 3  |
| Figure S4. Thermodynamic change with coordination of Ag(pyridine) <sub>2</sub> to complex 1.                                     | 4  |
| Figure S5. Reaction profile(s) illustrating the role of the [Ag(pyridine)] <sup>+</sup> .                                        | 5  |
| Figure S6. Energy profile for explaining the regioselectivity.                                                                   | 6  |
| Figure S7. Distortion-interaction analysis to reveal the origins of the regioselectivity.                                        | 7  |
| Figure S8. Thermodynamic change with coordination of SbF <sub>6</sub> <sup>-</sup> to complex 2A-SbF <sub>6</sub> <sup>-</sup> . | 8  |
| Table S2. NPA charge analysis of 2 and 2A.                                                                                       | 8  |
| Table S3. NPA charge analysis of 6 and 6A.                                                                                       | 8  |
| Table S4. Mulliken spin densities of 6A and 7A.                                                                                  | 16 |
| Computed Energy Components for DFT-Optimized Structures                                                                          | 19 |
| XYZ Coordinates                                                                                                                  | 20 |
| Frequencies                                                                                                                      | 49 |

## Computational Results

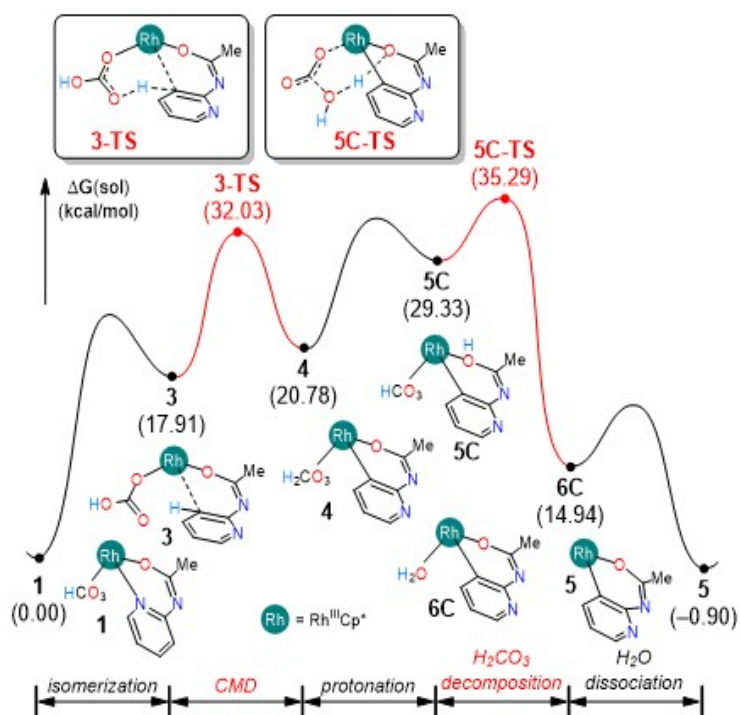

**Figure S1.** Energy profile of carbonic acid decomposition pathway.

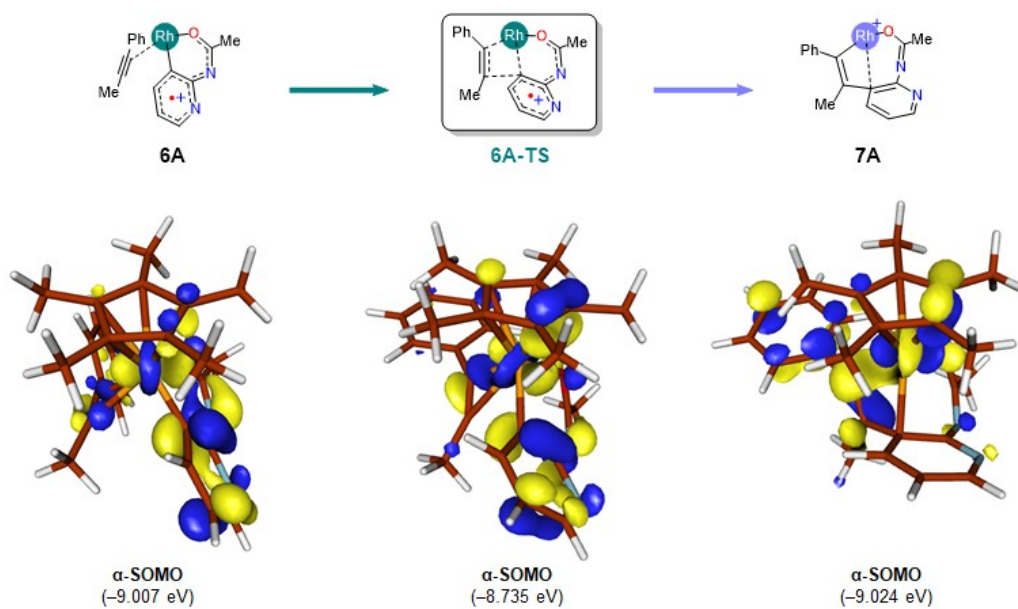

**Figure S2.** The frontier orbitals of **6A**, **6A-TS**, and **7A**. The SOMO orbital of **7A** does not feature over the pyridyl ligand.

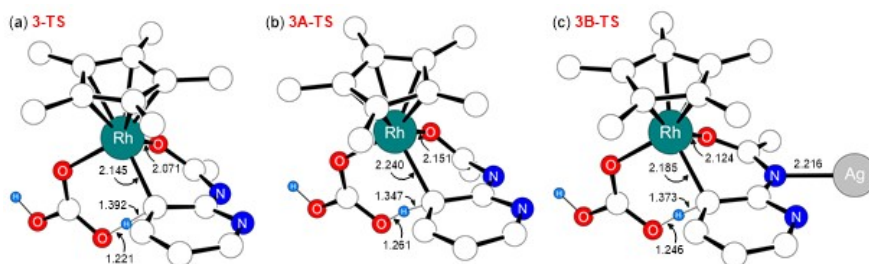

**Figure S3.** Comparison of DFT-optimized geometries of the transition states, **3-TS**, **3A-TS**, and **3B-TS** for C–H activation. Nonessential hydrogen atoms are omitted for clarity.

**Table S1.** Overall barriers of neutral, oxidized, and Ag(pyridine)-coordinated Rh complexes relative to each starting complex.

|                                           | <b>3-TS</b> | <b>3A-TS</b> | <b>3B-TS</b> |
|-------------------------------------------|-------------|--------------|--------------|
| $\Delta G^\ddagger$ from starting complex | 32.03       | 28.10        | 28.80        |

In the **3B-TS**, coordinating  $\text{Ag}^+$  to the amide attenuates a donating ability of the O-donor of the amide to the Rh(III) center. As the Rh(III) becomes more electrophilic, the step barrier for CMD is to be lower than the **3-TS** that is in the case without the Lewis acid.

We found that intermediate **6** is oxidized by an external oxidant,  $\text{Ag}^+$  at  $-0.68$  V of an oxidation potential. Intermediate **6** has the lowest oxidation potential among Rh(III) intermediates. We found that the energy trend of HOMO for intermediates is correlated by the oxidation potential.

Additionally, we found that coordinating the  $\text{Ag}(\text{pyridine})^+$  to the nitrogen of the amide of the 2-amidopyridine is an exergonic process with 2.7 kcal/mol downhill (Figure S4).

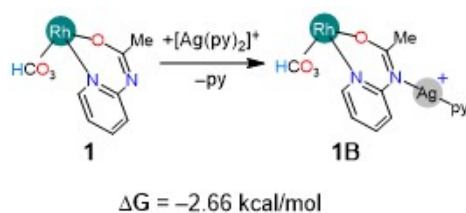

**Figure S4.** Thermodynamic change with coordination of  $\text{Ag}(\text{pyridine})_2$  to complex **1**.

As the Lewis acid coordinates the pyridine, the meta-C–H proton becomes acidic. The barrier for CMD of **3B-TS** is now only 28.8 kcal/mol uphill relative to the starting complex **1B**, which is around 3.2 kcal/mol lower in energy than the case without Lewis acid coordination, **3-TS**.

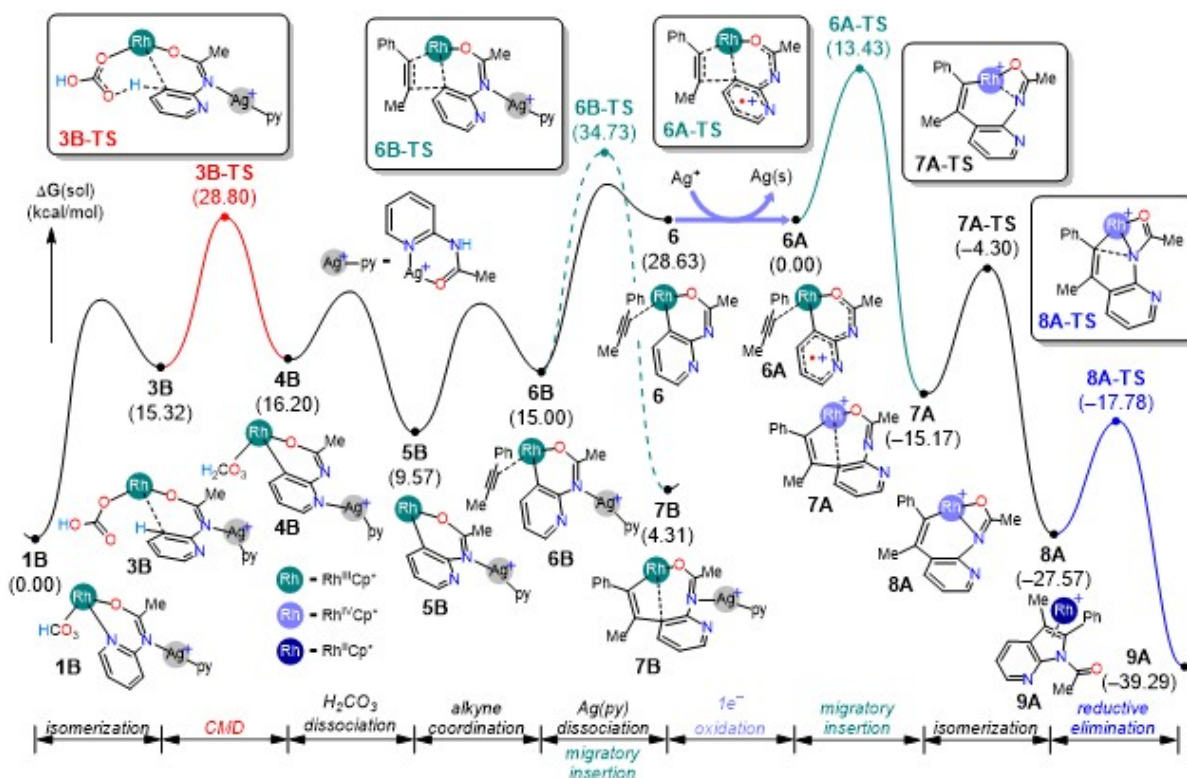

**Figure S5.** Reaction profile(s) illustrating the role of the  $[\text{Ag}(\text{pyridine})]^+$  is acted as a Lewis acid in the catalysis to form the 7-azaindole. Energies are in kcal/mol. (This profile will compare the oxidation path from complex 7 in scheme 2, with the path in Figure 1.)

As the  $[\text{Ag}(\text{pyridine})]^+$  coordinates to the N of amide, the O of carbonyl relatively weakly coordinates to the Rh center, as we found in the transition state structure analysis shown in Figure S3. The distance between the Rh center and O of amide is slightly elongated at the **3B-TS** compared to that of **3-TS**. This structural difference originates from increasing the electrophilicity of the Rh center. The meta-C of 2-amidopyridine more strongly interacts with the Rh center at the transition state **3B-TS**, lowering the activation barrier. The same result is observed at **3A-TS**. As the pyridyl ligand oxidizes, the O of carbonyl of amide is weakly donating so that the Rh center becomes more electrophilic. This strengthens the interaction between the Rh and the meta-C of 2-amidopyridine resulting in lowering the free energy of **3A-TS**.

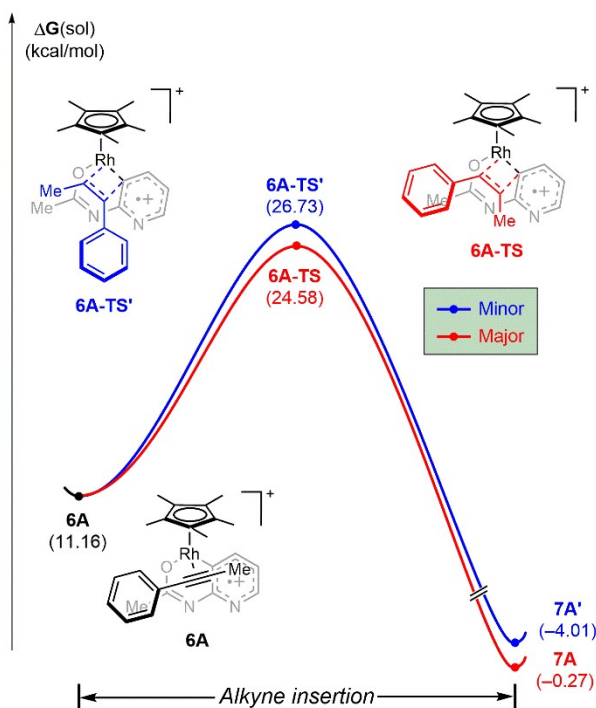

**Figure S6.** Energy profile for explaining the regioselectivity.

Figure S6 illustrates the free energy profile of the regio-determining step. In this alkyne insertion step, the orientation of the alkyne determines the regioselectivity, as the major product is formed as the reaction proceeds via **6A-TS** (highlighted in red color). We anticipate the formation of the minor product could occur via a somewhat more sterically congested transition state, **6A-TS'** (highlighted in blue). Quantitative inspection of the two transition states suggests that the difference in the transition state energies arises from the interaction between the Rh center and the C<sub>alkyne</sub> due to the substitution effect of a phenyl group versus a methyl group, resulting in the difference of 2.2 kcal/mol. As shown in Figure S7 below, the decomposition of energy into fragment interactions and distortion components reveals that the energy difference largely originates from the interaction between the metal fragment and substrate in the transition states. In **6A-TS**, the interaction energy between the metal fragment and substrate is 50.0 kcal/mol, whereas the interaction energy is 46.5 kcal/mol in **6A-TS'**. Consistent with the experimental observations, the reaction path involving **6A-TS** will eventually lead to the formation of 2-aryl-7-azaindole.

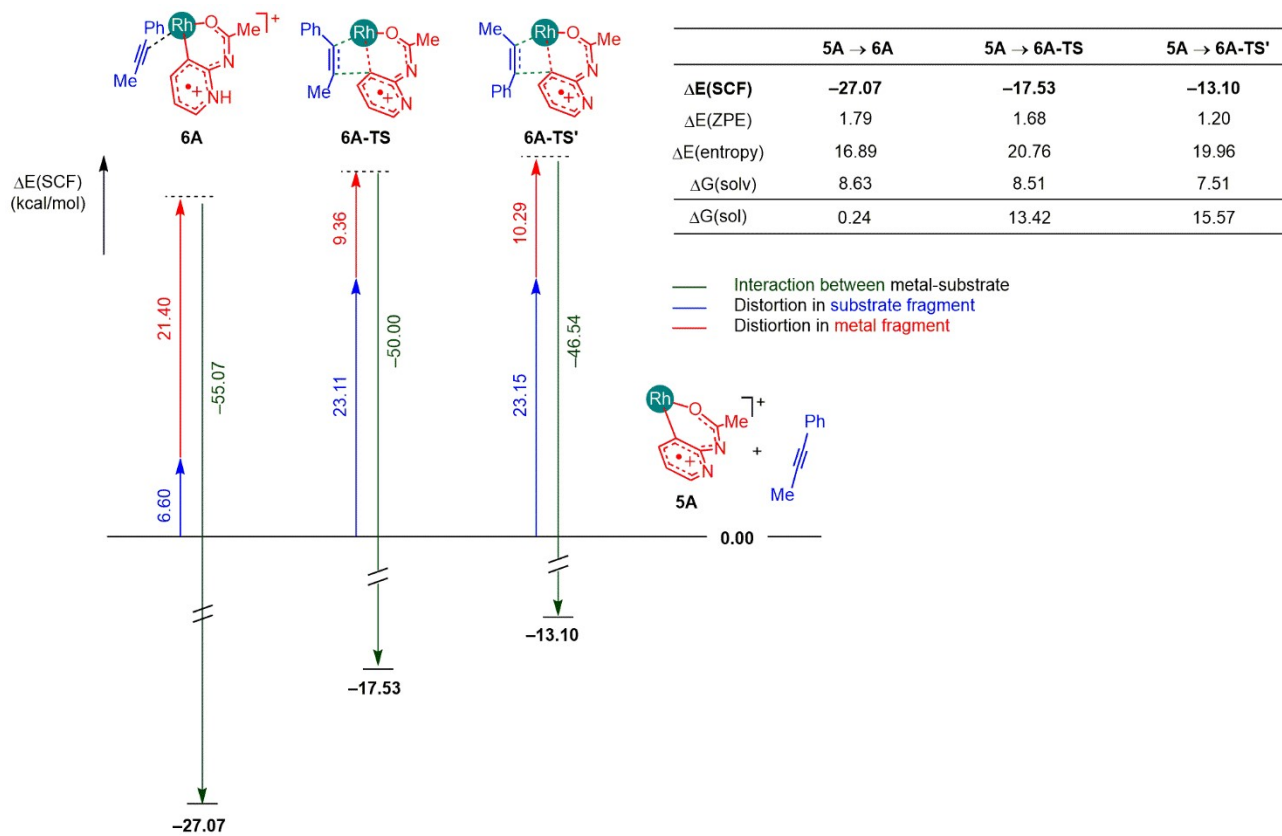

**Figure S7.** Distortion-interaction analysis to reveal the origins of the regioselectivity.

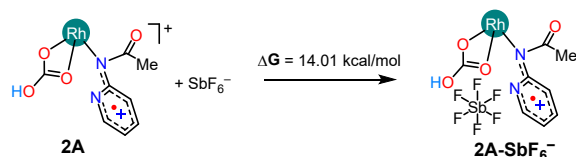

**Figure S8.** Thermodynamic change with coordination of  $\text{SbF}_6^-$  to complex  $\mathbf{2A-SbF}_6^-$ .

In the experimental conditions, counter ion  $\text{SbF}_6^-$  is not expected to bind to  $\text{Ag}^+$ , nor to cationic Rh complexes. Although the weak coordinating property of the counterion is not expected to alter the course of the reaction pathway, we evaluated the binding energy of the  $\mathbf{2A}$  and  $\text{SbF}_6^-$  in 1,2-DCE solutions to support our argument. As expected, the non-coordinating  $\text{SbF}_6^-$  shows the association energy of +14.01 kcal/mol. As  $\text{Ag}^+$  is expected to reduce and precipitate out of organic solution (1,2-DCE), only the cationic form,  $\mathbf{2A}$ , is plausible.

**Table S2.** NPA charge analysis of  $\mathbf{2}$  and  $\mathbf{2A}$ . Values are the summation of charges of each fragment.

|                             | <b>2</b> | <b>2A</b> | Difference |
|-----------------------------|----------|-----------|------------|
| pyridyl ligand              | -0.612   | 0.174     | 0.785      |
| $\text{RhCp}^+\text{HCO}_3$ | 0.612    | 0.826     | 0.215      |

**Table S3.** NPA charge analysis of  $\mathbf{6}$  and  $\mathbf{6A}$ . Values are the summation of charges of each fragment.

|                             | <b>6</b> | <b>6A</b> | Difference |
|-----------------------------|----------|-----------|------------|
| pyridyl ligand              | -0.836   | -0.169    | 0.667      |
| $\text{RhCp}^+\text{HCO}_3$ | 0.836    | 1.169     | 0.333      |

## Natural Population Analysis of 2, 2A, 6, and 6A

2

Summary of Natural Population Analysis:

| Atom No | Natural Charge | Natural Population |         |         | Total    |
|---------|----------------|--------------------|---------|---------|----------|
|         |                | Core               | Valence | Rydberg |          |
| O 1     | -0.64792       | 2.00000            | 6.62688 | 0.02103 | 8.64792  |
| N 2     | -0.64625       | 2.00000            | 5.61233 | 0.03393 | 7.64625  |
| N 3     | -0.50340       | 2.00000            | 5.47130 | 0.03210 | 7.50340  |
| C 4     | 0.66885        | 2.00000            | 3.29497 | 0.03619 | 5.33115  |
| C 5     | -0.15838       | 2.00000            | 4.14389 | 0.01450 | 6.15838  |
| C 6     | -0.28035       | 2.00000            | 4.26526 | 0.01509 | 6.28035  |
| C 7     | -0.24964       | 2.00000            | 4.23462 | 0.01502 | 6.24964  |
| C 8     | 0.04579        | 2.00000            | 3.93296 | 0.02126 | 5.95421  |
| C 9     | 0.38332        | 2.00000            | 3.58983 | 0.02685 | 5.61668  |
| H 10    | 0.20403        | 0.00000            | 0.79403 | 0.00193 | 0.79597  |
| H 11    | 0.17277        | 0.00000            | 0.82499 | 0.00223 | 0.82723  |
| H 12    | 0.20129        | 0.00000            | 0.79678 | 0.00193 | 0.79871  |
| C 13    | -0.02918       | 2.00000            | 4.00474 | 0.02445 | 6.02918  |
| C 14    | 0.04499        | 2.00000            | 3.93064 | 0.02437 | 5.95501  |
| C 15    | 0.04720        | 2.00000            | 3.92791 | 0.02489 | 5.95280  |
| C 16    | -0.01602       | 2.00000            | 3.99134 | 0.02468 | 6.01602  |
| C 17    | 0.03899        | 2.00000            | 3.93615 | 0.02486 | 5.96101  |
| C 18    | -0.61320       | 2.00000            | 4.60058 | 0.01261 | 6.61320  |
| C 19    | -0.61608       | 2.00000            | 4.60309 | 0.01299 | 6.61608  |
| C 20    | -0.61955       | 2.00000            | 4.60584 | 0.01372 | 6.61955  |
| C 21    | -0.62327       | 2.00000            | 4.61001 | 0.01327 | 6.62327  |
| C 22    | -0.63229       | 2.00000            | 4.61868 | 0.01361 | 6.63229  |
| H 23    | 0.21588        | 0.00000            | 0.78220 | 0.00192 | 0.78412  |
| H 24    | 0.21558        | 0.00000            | 0.78279 | 0.00164 | 0.78442  |
| H 25    | 0.23313        | 0.00000            | 0.76507 | 0.00180 | 0.76687  |
| H 26    | 0.22968        | 0.00000            | 0.76864 | 0.00168 | 0.77032  |
| H 27    | 0.22189        | 0.00000            | 0.77638 | 0.00173 | 0.77811  |
| H 28    | 0.21993        | 0.00000            | 0.77831 | 0.00176 | 0.78007  |
| H 29    | 0.21428        | 0.00000            | 0.78385 | 0.00187 | 0.78572  |
| H 30    | 0.23824        | 0.00000            | 0.76006 | 0.00171 | 0.76176  |
| H 31    | 0.22874        | 0.00000            | 0.76941 | 0.00185 | 0.77126  |
| H 32    | 0.23940        | 0.00000            | 0.75841 | 0.00220 | 0.76060  |
| H 33    | 0.21725        | 0.00000            | 0.78063 | 0.00212 | 0.78275  |
| H 34    | 0.21957        | 0.00000            | 0.77871 | 0.00172 | 0.78043  |
| H 35    | 0.25509        | 0.00000            | 0.74251 | 0.00240 | 0.74491  |
| H 36    | 0.22869        | 0.00000            | 0.76958 | 0.00174 | 0.77131  |
| H 37    | 0.21716        | 0.00000            | 0.78104 | 0.00180 | 0.78284  |
| Rh 38   | 0.79170        | 35.99975           | 8.17556 | 0.03300 | 44.20830 |
| H 39    | 0.22315        | 0.00000            | 0.77462 | 0.00223 | 0.77685  |
| C 40    | 0.96256        | 2.00000            | 2.99031 | 0.04713 | 5.03744  |
| O 41    | -0.70416       | 2.00000            | 6.68145 | 0.02271 | 8.70416  |
| O 42    | -0.64040       | 2.00000            | 6.61405 | 0.02635 | 8.64040  |
| O 43    | -0.66118       | 2.00000            | 6.64017 | 0.02102 | 8.66118  |
| H 44    | 0.48699        | 0.00000            | 0.50944 | 0.00357 | 0.51301  |



|      |          |         |         |         |         |
|------|----------|---------|---------|---------|---------|
| C 45 | -0.68393 | 2.00000 | 4.67183 | 0.01211 | 6.68393 |
| H 46 | 0.20759  | 0.00000 | 0.79044 | 0.00196 | 0.79241 |
| H 47 | 0.22486  | 0.00000 | 0.77372 | 0.00143 | 0.77514 |
| H 48 | 0.22660  | 0.00000 | 0.77142 | 0.00198 | 0.77340 |

=====  
 \* Total \* 0.00000 83.99967 137.38738 0.61295 222.00000

## 2A

Summary of Natural Population Analysis:

| Atom No | Natural Charge | Natural Population |         |         | Natural Spin | Density  |
|---------|----------------|--------------------|---------|---------|--------------|----------|
|         |                | Core               | Valence | Rydberg | Total        |          |
| O 1     | -0.52594       | 2.00000            | 6.50314 | 0.02280 | 8.52594      | 0.03647  |
| N 2     | -0.41855       | 2.00000            | 5.38318 | 0.03537 | 7.41855      | 0.53385  |
| N 3     | -0.41745       | 2.00000            | 5.38720 | 0.03025 | 7.41745      | 0.13960  |
| C 4     | 0.70189        | 2.00000            | 3.26364 | 0.03448 | 5.29811      | -0.02092 |
| C 5     | -0.16068       | 2.00000            | 4.14590 | 0.01478 | 6.16068      | -0.10863 |
| C 6     | -0.16208       | 2.00000            | 4.14812 | 0.01396 | 6.16208      | 0.27420  |
| C 7     | -0.18503       | 2.00000            | 4.17131 | 0.01372 | 6.18503      | 0.25563  |
| C 8     | 0.07731        | 2.00000            | 3.90203 | 0.02066 | 5.92269      | -0.05688 |
| C 9     | 0.33389        | 2.00000            | 3.64124 | 0.02487 | 5.66611      | -0.09922 |
| H 10    | 0.22885        | 0.00000            | 0.76965 | 0.00150 | 0.77115      | -0.00824 |
| H 11    | 0.20161        | 0.00000            | 0.79653 | 0.00186 | 0.79839      | 0.00159  |
| H 12    | 0.23188        | 0.00000            | 0.76644 | 0.00167 | 0.76812      | 0.00308  |
| C 13    | 0.01939        | 2.00000            | 3.95561 | 0.02500 | 5.98061      | -0.00343 |
| C 14    | 0.06321        | 2.00000            | 3.91192 | 0.02488 | 5.93679      | -0.00291 |
| C 15    | 0.04403        | 2.00000            | 3.93094 | 0.02503 | 5.95597      | -0.00291 |
| C 16    | 0.00449        | 2.00000            | 3.97082 | 0.02469 | 5.99551      | -0.00209 |
| C 17    | 0.05962        | 2.00000            | 3.91555 | 0.02484 | 5.94038      | -0.00176 |
| C 18    | -0.62371       | 2.00000            | 4.61053 | 0.01319 | 6.62371      | 0.00051  |
| C 19    | -0.62315       | 2.00000            | 4.60977 | 0.01338 | 6.62315      | 0.00027  |
| C 20    | -0.62151       | 2.00000            | 4.60814 | 0.01338 | 6.62151      | 0.00016  |
| C 21    | -0.62777       | 2.00000            | 4.61443 | 0.01334 | 6.62777      | 0.00019  |
| C 22    | -0.63360       | 2.00000            | 4.62027 | 0.01333 | 6.63360      | 0.00042  |
| H 23    | 0.23635        | 0.00000            | 0.76203 | 0.00161 | 0.76365      | -0.00006 |
| H 24    | 0.22646        | 0.00000            | 0.77200 | 0.00154 | 0.77354      | -0.00003 |
| H 25    | 0.24082        | 0.00000            | 0.75753 | 0.00165 | 0.75918      | -0.00011 |
| H 26    | 0.23251        | 0.00000            | 0.76591 | 0.00158 | 0.76749      | -0.00005 |
| H 27    | 0.24174        | 0.00000            | 0.75673 | 0.00152 | 0.75826      | -0.00016 |
| H 28    | 0.23042        | 0.00000            | 0.76790 | 0.00167 | 0.76958      | -0.00006 |
| H 29    | 0.23508        | 0.00000            | 0.76321 | 0.00172 | 0.76492      | -0.00026 |
| H 30    | 0.23835        | 0.00000            | 0.76008 | 0.00157 | 0.76165      | -0.00011 |
| H 31    | 0.22684        | 0.00000            | 0.77152 | 0.00163 | 0.77316      | -0.00001 |
| H 32    | 0.24522        | 0.00000            | 0.75318 | 0.00160 | 0.75478      | -0.00010 |
| H 33    | 0.23516        | 0.00000            | 0.76302 | 0.00182 | 0.76484      | -0.00023 |
| H 34    | 0.22507        | 0.00000            | 0.77341 | 0.00152 | 0.77493      | 0.00000  |
| H 35    | 0.24545        | 0.00000            | 0.75271 | 0.00184 | 0.75455      | -0.00009 |
| H 36    | 0.22486        | 0.00000            | 0.77345 | 0.00170 | 0.77514      | -0.00012 |
| H 37    | 0.24019        | 0.00000            | 0.75819 | 0.00162 | 0.75981      | -0.00049 |

|       |          |          |         |         |          |          |
|-------|----------|----------|---------|---------|----------|----------|
| Rh 38 | 0.76638  | 35.99977 | 8.20144 | 0.03241 | 44.23362 | 0.05919  |
| H 39  | 0.22750  | 0.00000  | 0.77059 | 0.00191 | 0.77250  | -0.00756 |
| C 40  | 0.96229  | 2.00000  | 2.99161 | 0.04610 | 5.03771  | 0.00039  |
| O 41  | -0.70684 | 2.00000  | 6.68350 | 0.02334 | 8.70684  | 0.00067  |
| O 42  | -0.64036 | 2.00000  | 6.61380 | 0.02656 | 8.64036  | 0.00250  |
| O 43  | -0.63882 | 2.00000  | 6.61701 | 0.02181 | 8.63882  | 0.00046  |
| H 44  | 0.49806  | 0.00000  | 0.49867 | 0.00327 | 0.50194  | 0.00000  |
| C 45  | -0.70408 | 2.00000  | 4.69248 | 0.01160 | 6.70408  | 0.00376  |
| H 46  | 0.24306  | 0.00000  | 0.75538 | 0.00156 | 0.75694  | 0.00348  |
| H 47  | 0.23605  | 0.00000  | 0.76269 | 0.00126 | 0.76395  | 0.00002  |
| H 48  | 0.26554  | 0.00000  | 0.73286 | 0.00160 | 0.73446  | -0.00004 |

=====  
\* Total \* 1.00000 83.99970 136.39729 0.60301 221.00000 1.00000

## 6

Summary of Natural Population Analysis:

| Atom No | Natural Charge | Natural Population |         |         | Total   |
|---------|----------------|--------------------|---------|---------|---------|
|         |                | Core               | Valence | Rydberg |         |
| O 1     | -0.69746       | 2.00000            | 6.67464 | 0.02282 | 8.69746 |
| N 2     | -0.56755       | 2.00000            | 5.53972 | 0.02783 | 7.56755 |
| N 3     | -0.41814       | 2.00000            | 5.39019 | 0.02796 | 7.41814 |
| C 4     | 0.61337        | 2.00000            | 3.35439 | 0.03224 | 5.38663 |
| C 5     | -0.24928       | 2.00000            | 4.23056 | 0.01872 | 6.24928 |
| C 6     | -0.27690       | 2.00000            | 4.26085 | 0.01605 | 6.27690 |
| C 7     | -0.13182       | 2.00000            | 4.10157 | 0.03026 | 6.13182 |
| C 8     | 0.02987        | 2.00000            | 3.94805 | 0.02209 | 5.97013 |
| C 9     | 0.30239        | 2.00000            | 3.67368 | 0.02394 | 5.69761 |
| H 10    | 0.19906        | 0.00000            | 0.79864 | 0.00230 | 0.80094 |
| H 11    | 0.17491        | 0.00000            | 0.82291 | 0.00218 | 0.82509 |
| H 12    | 0.18945        | 0.00000            | 0.80762 | 0.00293 | 0.81055 |
| C 13    | -0.04675       | 2.00000            | 4.02233 | 0.02442 | 6.04675 |
| C 14    | -0.02219       | 2.00000            | 3.99810 | 0.02410 | 6.02219 |
| C 15    | -0.00389       | 2.00000            | 3.97829 | 0.02561 | 6.00389 |
| C 16    | -0.02289       | 2.00000            | 3.99860 | 0.02429 | 6.02289 |
| C 17    | -0.00077       | 2.00000            | 3.97452 | 0.02625 | 6.00077 |
| C 18    | -0.61376       | 2.00000            | 4.60073 | 0.01303 | 6.61376 |
| C 19    | -0.61820       | 2.00000            | 4.60598 | 0.01222 | 6.61820 |
| C 20    | -0.61639       | 2.00000            | 4.60348 | 0.01291 | 6.61639 |
| C 21    | -0.62314       | 2.00000            | 4.61069 | 0.01245 | 6.62314 |
| C 22    | -0.61787       | 2.00000            | 4.60473 | 0.01314 | 6.61787 |
| H 23    | 0.21471        | 0.00000            | 0.78290 | 0.00239 | 0.78529 |
| H 24    | 0.21327        | 0.00000            | 0.78502 | 0.00171 | 0.78673 |
| H 25    | 0.21310        | 0.00000            | 0.78513 | 0.00178 | 0.78690 |
| H 26    | 0.21607        | 0.00000            | 0.78217 | 0.00176 | 0.78393 |
| H 27    | 0.21541        | 0.00000            | 0.78260 | 0.00198 | 0.78459 |
| H 28    | 0.21932        | 0.00000            | 0.77873 | 0.00195 | 0.78068 |
| H 29    | 0.21702        | 0.00000            | 0.78100 | 0.00197 | 0.78298 |
| H 30    | 0.21387        | 0.00000            | 0.78440 | 0.00172 | 0.78613 |

|       |          |          |         |         |          |
|-------|----------|----------|---------|---------|----------|
| H 31  | 0.23468  | 0.00000  | 0.76357 | 0.00174 | 0.76532  |
| H 32  | 0.24776  | 0.00000  | 0.74987 | 0.00237 | 0.75224  |
| H 33  | 0.21109  | 0.00000  | 0.78703 | 0.00188 | 0.78891  |
| H 34  | 0.20999  | 0.00000  | 0.78830 | 0.00171 | 0.79001  |
| H 35  | 0.22903  | 0.00000  | 0.76884 | 0.00213 | 0.77097  |
| H 36  | 0.22331  | 0.00000  | 0.77509 | 0.00160 | 0.77669  |
| H 37  | 0.21219  | 0.00000  | 0.78581 | 0.00200 | 0.78781  |
| Rh 38 | 0.64901  | 35.99965 | 8.31865 | 0.03270 | 44.35099 |
| C 39  | -0.11850 | 1.99999  | 4.09756 | 0.02095 | 6.11850  |
| C 40  | -0.16918 | 2.00000  | 4.15501 | 0.01418 | 6.16918  |
| C 41  | -0.13812 | 2.00000  | 4.12261 | 0.01551 | 6.13812  |
| H 42  | 0.20491  | 0.00000  | 0.79294 | 0.00215 | 0.79509  |
| H 43  | 0.22416  | 0.00000  | 0.77366 | 0.00218 | 0.77584  |
| C 44  | -0.20553 | 2.00000  | 4.19079 | 0.01474 | 6.20553  |
| C 45  | -0.20263 | 2.00000  | 4.18779 | 0.01484 | 6.20263  |
| H 46  | 0.20445  | 0.00000  | 0.79358 | 0.00197 | 0.79555  |
| H 47  | 0.20890  | 0.00000  | 0.78909 | 0.00200 | 0.79110  |
| C 48  | -0.18748 | 2.00000  | 4.17261 | 0.01488 | 6.18748  |
| H 49  | 0.20456  | 0.00000  | 0.79359 | 0.00185 | 0.79544  |
| C 50  | 0.00008  | 1.99999  | 3.97855 | 0.02138 | 5.99992  |
| C 51  | 0.00610  | 1.99999  | 3.97066 | 0.02325 | 5.99390  |
| C 52  | -0.64263 | 2.00000  | 4.62846 | 0.01418 | 6.64263  |
| H 53  | 0.22592  | 0.00000  | 0.77171 | 0.00237 | 0.77408  |
| H 54  | 0.24859  | 0.00000  | 0.74957 | 0.00184 | 0.75141  |
| H 55  | 0.21877  | 0.00000  | 0.77940 | 0.00182 | 0.78123  |
| C 56  | -0.63451 | 2.00000  | 4.62362 | 0.01089 | 6.63451  |
| H 57  | 0.20428  | 0.00000  | 0.79384 | 0.00187 | 0.79572  |
| H 58  | 0.22004  | 0.00000  | 0.77811 | 0.00185 | 0.77996  |
| H 59  | 0.20593  | 0.00000  | 0.79231 | 0.00176 | 0.79407  |

=====  
 \* Total \* 0.00000 93.99954 157.33484 0.66562 252.00000

## 6A

Summary of Natural Population Analysis:

| Atom No | Natural Charge | Natural Population |         |         | Natural Spin | Density  |
|---------|----------------|--------------------|---------|---------|--------------|----------|
|         |                | Core               | Valence | Rydberg | Total        |          |
| O 1     | -0.59927       | 2.00000            | 6.57472 | 0.02454 | 8.59927      | 0.12512  |
| N 2     | -0.45096       | 2.00000            | 5.42357 | 0.02739 | 7.45096      | 0.27006  |
| N 3     | -0.37964       | 2.00000            | 5.35099 | 0.02866 | 7.37964      | 0.05802  |
| C 4     | 0.67568        | 2.00000            | 3.29254 | 0.03178 | 5.32432      | 0.00064  |
| C 5     | -0.25667       | 2.00000            | 4.23810 | 0.01858 | 6.25667      | -0.07878 |
| C 6     | -0.17000       | 2.00000            | 4.15508 | 0.01492 | 6.17000      | 0.21179  |
| C 7     | -0.06504       | 2.00000            | 4.03501 | 0.03004 | 6.06504      | 0.23263  |
| C 8     | 0.07506        | 2.00000            | 3.90380 | 0.02114 | 5.92494      | 0.01683  |
| C 9     | 0.32135        | 2.00000            | 3.65520 | 0.02345 | 5.67865      | 0.01977  |
| H 10    | 0.22053        | 0.00000            | 0.77765 | 0.00182 | 0.77947      | -0.00634 |
| H 11    | 0.20043        | 0.00000            | 0.79765 | 0.00192 | 0.79957      | -0.00076 |
| H 12    | 0.20945        | 0.00000            | 0.78785 | 0.00270 | 0.79055      | 0.00205  |

|       |          |          |         |         |          |          |
|-------|----------|----------|---------|---------|----------|----------|
| C 13  | 0.00155  | 2.00000  | 3.97380 | 0.02466 | 5.99845  | -0.00512 |
| C 14  | -0.00732 | 2.00000  | 3.98290 | 0.02442 | 6.00732  | -0.00178 |
| C 15  | -0.00462 | 2.00000  | 3.97776 | 0.02686 | 6.00462  | 0.00303  |
| C 16  | 0.00113  | 2.00000  | 3.97384 | 0.02503 | 5.99887  | -0.00306 |
| C 17  | 0.02793  | 2.00000  | 3.94562 | 0.02645 | 5.97207  | 0.01166  |
| C 18  | -0.62679 | 2.00000  | 4.61295 | 0.01385 | 6.62679  | 0.00023  |
| C 19  | -0.62628 | 2.00000  | 4.61357 | 0.01271 | 6.62628  | 0.00014  |
| C 20  | -0.62269 | 2.00000  | 4.60949 | 0.01320 | 6.62269  | -0.00008 |
| C 21  | -0.62812 | 2.00000  | 4.61543 | 0.01269 | 6.62812  | 0.00016  |
| C 22  | -0.62410 | 2.00000  | 4.61061 | 0.01349 | 6.62410  | 0.00015  |
| H 23  | 0.23766  | 0.00000  | 0.76027 | 0.00208 | 0.76234  | -0.00046 |
| H 24  | 0.22363  | 0.00000  | 0.77480 | 0.00158 | 0.77637  | -0.00004 |
| H 25  | 0.21938  | 0.00000  | 0.77894 | 0.00168 | 0.78062  | -0.00009 |
| H 26  | 0.22204  | 0.00000  | 0.77640 | 0.00156 | 0.77796  | 0.00000  |
| H 27  | 0.23217  | 0.00000  | 0.76611 | 0.00172 | 0.76783  | -0.00022 |
| H 28  | 0.23090  | 0.00000  | 0.76735 | 0.00175 | 0.76910  | -0.00008 |
| H 29  | 0.23876  | 0.00000  | 0.75942 | 0.00182 | 0.76124  | -0.00006 |
| H 30  | 0.21771  | 0.00000  | 0.78072 | 0.00158 | 0.78229  | 0.00012  |
| H 31  | 0.23132  | 0.00000  | 0.76706 | 0.00162 | 0.76868  | -0.00006 |
| H 32  | 0.24577  | 0.00000  | 0.75231 | 0.00192 | 0.75423  | -0.00018 |
| H 33  | 0.23031  | 0.00000  | 0.76803 | 0.00166 | 0.76969  | -0.00017 |
| H 34  | 0.21896  | 0.00000  | 0.77946 | 0.00158 | 0.78104  | -0.00001 |
| H 35  | 0.23179  | 0.00000  | 0.76650 | 0.00171 | 0.76821  | 0.00046  |
| H 36  | 0.22579  | 0.00000  | 0.77269 | 0.00152 | 0.77421  | 0.00004  |
| H 37  | 0.23383  | 0.00000  | 0.76437 | 0.00180 | 0.76617  | 0.00043  |
| Rh 38 | 0.63794  | 35.99967 | 8.33111 | 0.03128 | 44.36206 | 0.09847  |
| C 39  | -0.14261 | 1.99999  | 4.12143 | 0.02119 | 6.14261  | 0.00129  |
| C 40  | -0.15370 | 2.00000  | 4.13951 | 0.01419 | 6.15370  | 0.00021  |
| C 41  | -0.15398 | 2.00000  | 4.13926 | 0.01473 | 6.15398  | 0.00457  |
| H 42  | 0.20689  | 0.00000  | 0.79086 | 0.00226 | 0.79311  | -0.00001 |
| H 43  | 0.22384  | 0.00000  | 0.77409 | 0.00207 | 0.77616  | -0.00015 |
| C 44  | -0.19106 | 2.00000  | 4.17640 | 0.01467 | 6.19106  | 0.00325  |
| C 45  | -0.19078 | 2.00000  | 4.17588 | 0.01491 | 6.19078  | -0.00104 |
| H 46  | 0.21771  | 0.00000  | 0.78048 | 0.00181 | 0.78229  | -0.00010 |
| H 47  | 0.22217  | 0.00000  | 0.77605 | 0.00178 | 0.77783  | 0.00003  |
| C 48  | -0.16669 | 2.00000  | 4.15194 | 0.01475 | 6.16669  | 0.00393  |
| H 49  | 0.21936  | 0.00000  | 0.77896 | 0.00168 | 0.78064  | -0.00013 |
| C 50  | 0.00923  | 1.99999  | 3.96920 | 0.02158 | 5.99077  | 0.01305  |
| C 51  | 0.02803  | 1.99999  | 3.94813 | 0.02385 | 5.97197  | 0.01729  |
| C 52  | -0.64570 | 2.00000  | 4.63093 | 0.01478 | 6.64570  | -0.00063 |
| H 53  | 0.24609  | 0.00000  | 0.75177 | 0.00214 | 0.75391  | 0.00006  |
| H 54  | 0.24303  | 0.00000  | 0.75522 | 0.00175 | 0.75697  | 0.00007  |
| H 55  | 0.22847  | 0.00000  | 0.76990 | 0.00163 | 0.77153  | 0.00077  |
| C 56  | -0.65563 | 2.00000  | 4.64412 | 0.01152 | 6.65563  | 0.00017  |
| H 57  | 0.23856  | 0.00000  | 0.76010 | 0.00134 | 0.76144  | 0.00166  |
| H 58  | 0.23911  | 0.00000  | 0.75952 | 0.00137 | 0.76089  | -0.00022 |
| H 59  | 0.22812  | 0.00000  | 0.77034 | 0.00153 | 0.77188  | 0.00143  |

=====  
\* Total \* 1.00000 93.99956 156.33777 0.66267 251.00000 1.00000

**Table S4.** Mulliken spin densities of 6A and 7A.Atomic Spin Densities of **6A**

|      |          |          |          |          |          |
|------|----------|----------|----------|----------|----------|
| Atom | O1       | N2       | N3       | C4       | C5       |
| Spin | 0.12421  | 0.2748   | 0.05735  | 0.00289  | -0.11614 |
| Atom | C6       | C7       | C8       | C9       | H10      |
| Spin | 0.24636  | 0.27024  | 0.00493  | -0.00067 | -0.01502 |
| Atom | H11      | H12      | C13      | C14      | C15      |
| Spin | -0.00241 | 0.00465  | -0.0065  | -0.0015  | 0.00158  |
| Atom | C16      | C17      | C18      | C19      | C20      |
| Spin | -0.00371 | 0.01554  | 0.00033  | 0.00023  | 0.00011  |
| Atom | C21      | C22      | H23      | H24      | H25      |
| Spin | 0.0003   | -0.00069 | -0.00043 | -0.00003 | -0.00012 |
| Atom | H26      | H27      | H28      | H29      | H30      |
| Spin | 0.00001  | -0.00021 | 0.00003  | -0.00009 | 0.00015  |
| Atom | H31      | H32      | H33      | H34      | H35      |
| Spin | -0.00019 | -0.00054 | -0.00011 | -0.00002 | 0.00089  |
| Atom | H36      | H37      | Rh38     | C39      | C40      |
| Spin | 0.00001  | 0.00044  | 0.09881  | 0.00113  | -0.00055 |
| Atom | C41      | H42      | H43      | C44      | C45      |
| Spin | 0.00424  | -0.00005 | -0.0001  | 0.00358  | -0.00133 |
| Atom | H46      | H47      | C48      | H49      | C50      |
| Spin | -0.00028 | 0.00005  | 0.00463  | -0.00032 | 0.0118   |
| Atom | C51      | C52      | H53      | H54      | H55      |
| Spin | 0.02041  | -0.00062 | -0.00009 | -0.00077 | 0.00122  |
| Atom | C56      | H57      | H58      | H59      |          |
| Spin | -0.00174 | 0.00203  | -0.00058 | 0.00184  |          |

Atomic Spin Densities of **7A**

|      |          |          |          |          |          |
|------|----------|----------|----------|----------|----------|
| Atom | O1       | N2       | N3       | C4       | C5       |
| Spin | 0.07547  | 0.02592  | 0.00699  | -0.01373 | 0.00379  |
| Atom | C6       | C7       | C8       | C9       | H10      |
| Spin | 0.00199  | -0.00765 | -0.00225 | 0.00004  | -0.00005 |
| Atom | H11      | H12      | C13      | C14      | C15      |
| Spin | 0.00013  | 0.00018  | -0.00376 | -0.00138 | -0.01276 |
| Atom | C16      | C17      | C18      | C19      | C20      |
| Spin | 0.08121  | 0.04576  | 0.00009  | 0.00017  | 0.00033  |
| Atom | C21      | C22      | H23      | H24      | H25      |
| Spin | -0.00688 | -0.00462 | -0.00099 | -0.00035 | 0.00048  |

|      |          |          |          |          |          |
|------|----------|----------|----------|----------|----------|
| Atom | H26      | H27      | H28      | H29      | H30      |
| Spin | 0.00017  | 0.00004  | 0        | -0.00085 | -0.00012 |
| Atom | H31      | H32      | H33      | H34      | H35      |
| Spin | -0.00009 | -0.00002 | 0.00471  | 0.0044   | -0.00009 |
| Atom | H36      | H37      | Rh38     | C39      | C40      |
| Spin | 0.00291  | 0.00306  | 0.3311   | -0.00783 | 0.05773  |
| Atom | C41      | H42      | H43      | C44      | C45      |
| Spin | 0.06399  | -0.00339 | -0.00484 | -0.03066 | -0.03765 |
| Atom | H46      | H47      | C48      | H49      | C50      |
| Spin | 0.00133  | 0.00184  | 0.08746  | -0.0056  | 0.13239  |
| Atom | C51      | C52      | H53      | H54      | H55      |
| Spin | 0.18309  | 0.01097  | 0.00244  | 0.0122   | -0.0011  |
| Atom | C56      | H57      | H58      | H59      |          |
| Spin | 0.00459  | 0.00116  | -0.00081 | -0.00068 |          |

## Computed Energy Components for DFT-Optimized Structures

|               | <b>E(SCF)/(eV)</b> | <b>ZPE/(kcal/mol)</b> | <b>S(gas)/(cal/mol·K)</b> | <b>G(soln)/(kcal/mol)</b> |
|---------------|--------------------|-----------------------|---------------------------|---------------------------|
|               | cc-pVTZ(-f)/LACV3P | 6-31G**/LACVP         | 6-31G**/LACVP             | 6-31G**/LACVP             |
| <b>1</b>      | -33204.090         | 242.45                | 178.66                    | -18.55                    |
| <b>2</b>      | -33203.492         | 241.86                | 180.54                    | -18.87                    |
| <b>3</b>      | -33203.059         | 241.57                | 181.45                    | -22.52                    |
| <b>3-TS</b>   | -33202.461         | 238.31                | 176.92                    | -20.57                    |
| <b>4</b>      | -33203.113         | 241.24                | 177.26                    | -19.59                    |
| <b>5</b>      | -25988.158         | 215.47                | 160.17                    | -16.76                    |
| <b>6</b>      | -35453.961         | 303.77                | 200.46                    | -17.61                    |
| <b>6-TS</b>   | -35453.484         | 303.32                | 196.03                    | -15.16                    |
| <b>7</b>      | -35455.074         | 304.97                | 192.99                    | -12.67                    |
| <b>7-TS</b>   | -35454.430         | 304.53                | 190.92                    | -11.01                    |
| <b>8</b>      | -35455.570         | 305.45                | 195.89                    | -10.29                    |
| <b>9</b>      | -35454.813         | 305.09                | 196.03                    | -10.60                    |
| <b>9-TS</b>   | -35454.488         | 304.32                | 193.35                    | -8.92                     |
| <b>10</b>     | -35455.195         | 305.63                | 199.21                    | -8.77                     |
| <b>2A</b>     | -33197.066         | 241.06                | 185.73                    | -45.76                    |
| <b>2A'</b>    | -33197.137         | 241.15                | 185.55                    | -45.55                    |
| <b>3A-TS</b>  | -33195.750         | 237.81                | 179.87                    | -48.15                    |
| <b>4A</b>     | -33196.461         | 241.32                | 182.94                    | -47.34                    |
| <b>5A</b>     | -25981.365         | 214.86                | 162.54                    | -46.26                    |
| <b>6A</b>     | -35447.742         | 303.25                | 207.26                    | -42.04                    |
| <b>6A-TS</b>  | -35447.328         | 303.14                | 196.61                    | -41.92                    |
| <b>6A-TS'</b> | -35447.136         | 302.66                | 198.83                    | -42.92                    |
| <b>7A</b>     | -35448.633         | 304.79                | 195.91                    | -42.32                    |
| <b>7A'</b>    | -35448.462         | 304.70                | 195.58                    | -42.56                    |
| <b>7A-TS</b>  | -35448.336         | 304.53                | 194.17                    | -38.67                    |
| <b>8A</b>     | -35449.305         | 305.49                | 199.86                    | -38.49                    |
| <b>8A-TS</b>  | -35448.902         | 304.19                | 196.87                    | -37.78                    |
| <b>9A</b>     | -35449.918         | 305.78                | 197.38                    | -37.27                    |
| <b>1B</b>     | -49588.652         | 334.08                | 252.52                    | -52.63                    |
| <b>3B</b>     | -49588.012         | 333.44                | 253.26                    | -51.16                    |
| <b>3B-TS</b>  | -49587.672         | 330.79                | 238.83                    | -48.10                    |
| <b>4B</b>     | -49588.348         | 334.02                | 245.58                    | -45.90                    |

|              |            |        |        |        |
|--------------|------------|--------|--------|--------|
| <b>5B</b>    | -42373.445 | 307.42 | 233.25 | -41.19 |
| <b>6B</b>    | -51839.488 | 395.79 | 275.31 | -40.43 |
| <b>6B-TS</b> | -51838.734 | 395.17 | 270.36 | -39.27 |
| <b>7B</b>    | -51840.102 | 396.81 | 269.19 | -40.21 |
| <b>5C</b>    | -33202.660 | 241.21 | 178.30 | -21.09 |
| <b>5C-TS</b> | -33202.352 | 238.96 | 177.74 | -20.18 |
| <b>6C</b>    | -28069.318 | 231.85 | 165.51 | -17.99 |

### XYZ Coordinates

```

=====
1
=====
O -0.601265788 -2.228587151 -0.291156709
N 1.079713821 -2.121599197 -1.947880864
N 1.952474236 -0.870195329 -0.053437024
C -0.063079081 -2.515488863 -1.423392296
C 4.315976143 -0.532304347 -1.469083428
C 4.211231709 -0.062918350 -0.149614409
C 3.247068882 -1.193845034 -2.034913540
C 3.016938210 -0.255194187 0.517257512
C 2.041135788 -1.393546939 -1.310505390
H 5.036217213 0.431477726 0.351164579
H 2.878393888 0.040762160 1.550664902
H 5.233301163 -0.391809285 -2.034410000
C -0.963488102 0.499136001 2.464065552
C -1.876148939 0.097267739 1.436928868
C 0.067792311 1.315700769 1.869573236
C -1.426393390 0.697134078 0.188840479
C -0.239981428 1.447197676 0.459315866
C -1.016147971 0.112823315 3.908446550
C -3.073105812 -0.794438004 1.557983041
C 1.160321712 2.021631479 2.612011433
C -2.115655661 0.513903499 -1.127138138
C 0.566596568 2.232513666 -0.529969513
H -1.524950504 0.893964052 4.486798286
H -1.557245851 -0.825019360 4.048284054
H -0.005533883 -0.014683301 4.300400257
H -3.025089025 -1.588877916 0.806010902
H -4.001513481 -0.231054410 1.404885650
H -3.118873119 -1.267477155 2.540546894
H 0.763376832 2.898930550 3.138175249
H 1.619473100 1.346121430 3.335715532
H 1.939649105 2.369612932 1.929363132
H -1.479588270 0.815692365 -1.961315036
H -3.036749840 1.107695103 -1.164853096
H -2.381591558 -0.537214398 -1.268041134
H 0.363224357 1.913968921 -1.554373622
H 1.637712955 2.108695745 -0.349882632
H 0.331983685 3.300745249 -0.451462388
Rh 0.111160554 -0.694111109 0.920464098

H 3.284122944 -1.599584579 -3.038992643
C 1.574664354 -1.997277617 3.111911297
O 2.090733051 -0.914624393 3.435225725
O 0.716370523 -2.240832567 2.189697266
O 1.912081480 -3.131089449 3.798665285
H 2.556505442 -2.835418940 4.458113670
C -0.897990406 -3.454567194 -2.271286726
H -0.385701329 -3.697185516 -3.202082872
H -1.097874403 -4.368672371 -1.703180790
H -1.867691755 -2.992774248 -2.489425421

=====
2
=====
O -0.578474700 -2.639305115 -2.245607853
N 0.025329642 -2.165440798 -0.059646193
N 2.285194159 -1.842477679 0.394623548
C -0.884532392 -2.391189098 -1.074165463
C 3.011331081 -4.201938152 -0.884828210
C 3.984574318 -3.426229477 -0.241320327
C 1.687719941 -3.795594454 -0.873627782
C 3.557380199 -2.259341240 0.378315091
C 1.347106695 -2.594512939 -0.207300603
H 5.030041218 -3.716704130 -0.225995928
H 4.269448280 -1.610770226 0.889049530
H 3.288458109 -5.123307705 -1.390769958
C 0.201982737 1.805995464 1.435361385
C -1.034907460 1.687827110 0.737672925
C 1.252513051 1.293859005 0.562338054
C -0.773791909 1.075562239 -0.555595219
C 0.654954314 0.879616380 -0.672470152
C 0.438378572 2.350040913 2.810831070
C -2.394486427 2.052939177 1.243607402
C 2.698575497 1.255741000 0.937219501
C -1.778424978 0.846923411 -1.641820669
C 1.344611287 0.319639236 -1.877312064
H 0.930125952 3.329083681 2.762501955
H -0.496611029 2.467787266 3.362292528
H 1.082125068 1.676005840 3.383056641
H -3.123170137 1.281697631 0.982314289
H -2.724508286 2.997546196 0.794530749

```



H -2.402250290 2.165899754 2.329072237  
H 3.086391687 2.278403521 1.027729392  
H 2.828204155 0.752333879 1.899163127  
H 3.288307667 0.715035081 0.199001536  
H -1.465977430 0.035386551 -2.302379131  
H -1.896101594 1.755036831 -2.246419430  
H -2.755931616 0.588309705 -1.228962541  
H 0.816072166 -0.555626988 -2.267195702  
H 2.361749887 0.009681865 -1.639931679  
H 1.380556226 1.080487609 -2.666900635  
Rh -0.166876271 -0.320043296 0.975105047  
H 0.921771348 -4.369601250 -1.377703786  
C -0.756288767 -1.648776889 3.044619322  
O -1.682701468 -1.233183622 2.265949249  
O 0.447879285 -1.335573554 2.861451149  
O -1.075721383 -2.435416222 4.085253716  
H -2.030754566 -2.592083693 4.035280704  
C -2.353351116 -2.381398439 -0.674962223  
H -2.953181982 -1.983672500 -1.496462584  
H -2.650371075 -3.428254128 -0.531502962  
H -2.553250790 -1.855413675 0.256973147

=====

3

=====

O -0.295968175 -2.040455103 -0.200084001  
N 1.674329400 -2.785856724 -1.178914905  
N 3.612385511 -1.524185658 -0.971162438  
C 0.392830133 -2.881947994 -0.895231009  
C 3.368354559 -1.518055558 1.849725962  
C 4.478835583 -0.971077383 1.241676688  
C 2.345946550 -2.086946726 1.050915003  
C 4.531448841 -1.005992889 -0.172467530  
C 2.524172783 -2.113207817 -0.382788807  
H 5.294662952 -0.532591641 1.806960106  
H 5.395174980 -0.568744481 -0.676769733  
H 3.264540434 -1.548224688 2.931164265  
C 0.672061861 1.417060494 1.937557459  
C -0.685132980 1.162730694 1.484763265  
C 1.518499136 1.444173932 0.780040145  
C -0.650497198 0.975225270 0.064208686  
C 0.726707995 1.092270136 -0.371583581  
C 1.059681654 1.699640751 3.355769396  
C -1.866665602 1.067882299 2.396133661  
C 2.952138186 1.851949453 0.748897195  
C -1.791860819 0.625972331 -0.836302280  
C 1.206832528 0.998349726 -1.788298965  
H 0.812305868 2.731678724 3.633500576  
H 0.527326167 1.026383162 4.033206940  
H 2.131235600 1.554720044 3.510442972  
H -2.786181927 0.860381305 1.846274257  
H -1.997808337 2.001348019 2.954581499  
H -1.705167532 0.253754228 3.110520601  
H 3.004695892 2.942756414 0.641162872  
H 3.478797913 1.574437737 1.662976265  
H 3.479322195 1.405759692 -0.095033973  
H -1.642162204 -0.379405767 -1.245290160  
H -1.852365017 1.334725380 -1.668963194

H -2.743198156 0.634268105 -0.302332193  
H 0.539548516 0.364934951 -2.376448631  
H 2.203413963 0.553405464 -1.839486837  
H 1.240064025 1.990068913 -2.256628990  
Rh 0.570186257 -0.588822663 1.033347964  
H 1.668425441 -2.820055723 1.491039395  
C -0.359993815 -2.859224081 2.860729456  
O -0.156012416 -1.572915792 2.762967587  
O 0.083319239 -3.764112473 2.166656256  
O -1.167198062 -3.178738594 3.921872377  
H -1.414113164 -2.340329885 4.336861134  
C -0.393703103 -4.031883240 -1.465357900  
H 0.196879789 -4.592720032 -2.189905882  
H -0.665839791 -4.677590370 -0.623053312  
H -1.321117401 -3.671479225 -1.919729233

=====

3-TS

=====

O -0.317289859 -2.059553623 -0.163241521  
N 1.691157937 -3.174140453 -0.679397821  
N 3.845526934 -2.520018101 -0.230940491  
C 0.389926374 -3.029336691 -0.660245121  
C 3.125203848 -1.403822899 2.239525318  
C 4.462008953 -1.558547616 1.911423206  
C 2.111691236 -1.842599750 1.358262658  
C 4.748482227 -2.068086863 0.630481005  
C 2.535055876 -2.487736940 0.142942190  
H 5.263265133 -1.257534266 2.579450130  
H 5.783699989 -2.101222992 0.286602080  
H 2.838121414 -0.942957342 3.183663845  
C 0.670672297 1.604756117 1.587780237  
C -0.601511776 1.469817519 0.877490044  
C 1.722880840 1.318790913 0.665223479  
C -0.325606704 1.046195388 -0.444540411  
C 1.118625164 0.862641335 -0.564611733  
C 0.805148125 2.093595266 2.997328281  
C -1.938175678 1.689193726 1.516383290  
C 3.189460516 1.504052401 0.887173116  
C -1.302838922 0.682788372 -1.518098950  
C 1.842749834 0.465233445 -1.815166831  
H 0.689328730 3.183569670 3.047604084  
H 0.038881470 1.644867182 3.635355234  
H 1.781590462 1.838884830 3.415474892  
H -2.754766464 1.443368793 0.834986687  
H -2.054286957 2.732867718 1.831372619  
H -2.038820505 1.054299712 2.402751446  
H 3.491998672 2.481774807 0.490862250  
H 3.449213028 1.472907186 1.946517229  
H 3.774616957 0.735100746 0.380195409  
H -1.281099200 -0.401198894 -1.682633758  
H -1.044804096 1.178195596 -2.459948778  
H -2.322628021 0.965228498 -1.249393344  
H 1.237404823 -0.225181833 -2.406877518  
H 2.782033920 -0.042246297 -1.583672047  
H 2.066140652 1.343367577 -2.434480906  
Rh 0.473300993 -0.514631271 0.966584086  
H 1.173239827 -2.612761974 2.038597584

C -0.585620761 -2.489540577 2.977810621  
O -0.716790617 -1.283533812 2.627577305  
O 0.360589921 -3.275578022 2.663445473  
O -1.523887634 -3.021629572 3.782347679  
H -2.190339804 -2.331378698 3.918413877  
C -0.439255953 -4.100232124 -1.332143545  
H 0.196294084 -4.770066261 -1.911403775  
H -0.961007953 -4.674896240 -0.558521271  
H -1.200882196 -3.644620895 -1.972273827

=====  
4  
=====

O -0.184227273 -2.467598915 0.353821784  
N 1.936300397 -3.281015635 -0.290078938  
N 3.764369249 -3.319420576 1.103846550  
C 0.664984941 -3.160881519 -0.429676175  
C 2.991844893 -1.037358165 2.502950191  
C 4.169502735 -1.707105875 2.845313787  
C 2.199399233 -1.514212489 1.459324121  
C 4.503814697 -2.841044664 2.105814695  
C 2.616970301 -2.686160326 0.782733023  
H 4.805461407 -1.361088395 3.655502558  
H 5.415373325 -3.394785881 2.329806566  
H 2.688465357 -0.150900170 3.056099653  
C 0.692247808 1.635627151 1.009809732  
C -0.698261917 1.428234220 0.565583169  
C 1.564099312 1.122429252 -0.000279241  
C -0.671555161 0.707099617 -0.631154954  
C 0.737820923 0.420562267 -0.951438606  
C 1.081813216 2.434634686 2.217001200  
C -1.890162468 1.861956358 1.363737702  
C 3.054234028 1.257506132 -0.061050646  
C -1.824281096 0.156027943 -1.413927197  
C 1.216079950 -0.266055882 -2.196123600  
H 0.994031549 3.511350155 2.023124218  
H 0.435961813 2.194951534 3.066621304  
H 2.114027977 2.230167627 2.510534763  
H -2.823201895 1.512018681 0.917857051  
H -1.935298920 2.955069304 1.439275980  
H -1.834333658 1.462189794 2.382092953  
H 3.326097250 2.176456451 -0.594937027  
H 3.494557858 1.297153234 0.937283635  
H 3.504646063 0.410789400 -0.582715809  
H -1.793961525 -0.939879894 -1.404749155  
H -1.782992840 0.484969646 -2.458329678  
H -2.783732176 0.468901932 -0.996638834  
H 0.455193043 -0.949334621 -2.579032898  
H 2.115007877 -0.855656147 -2.001490355  
H 1.440763593 0.464736581 -2.983203411  
Rh 0.499887913 -0.552135527 0.947725713  
H -0.444751114 -2.970108986 1.689617395  
C -0.512903571 -2.122536421 3.405979872  
O -0.221530616 -0.977714717 3.003739119  
O -0.632011235 -3.192100286 2.694686890  
O -0.751781523 -2.335609198 4.704127789  
H -0.611486793 -1.489655256 5.154902458  
C -0.028004700 -3.858808041 -1.573436499

H 0.696852386 -4.369647026 -2.207847834  
H -0.749693215 -4.582930565 -1.179208398  
H -0.597946107 -3.134243727 -2.166501045

=====  
5  
=====

O 3.748417616 2.393520594 -0.290382624  
N 5.611860752 0.981935740 -0.036467351  
N 7.607882023 1.291931033 0.995621443  
C 4.424908638 1.292222381 -0.474989235  
C 6.869937897 3.692355633 2.206628561  
C 8.130220413 3.165609837 2.420448780  
C 5.943943501 3.046889305 1.356401920  
C 8.441262245 1.953427076 1.776470542  
C 6.359542370 1.804220319 0.769834638  
H 9.424431801 1.501371861 1.917075992  
H 8.859054565 3.659715176 3.056802034  
H 6.597414494 4.628122330 2.683937311  
C 4.084307194 6.038424492 1.580400705  
C 3.674828768 5.193408012 2.645318985  
C 3.123419046 5.873783588 0.481145680  
C 2.514192343 4.445034504 2.174603939  
C 2.133714914 4.946521759 0.874441564  
C 5.191054344 7.048162937 1.583243728  
C 4.231490612 5.118360519 4.034545422  
C 3.217017889 6.607356548 -0.820505321  
C 1.742867708 3.439193010 2.969874144  
C 1.017102599 4.386703491 0.042041250  
H 5.736923695 7.038331985 0.635998487  
H 4.790318966 8.059679031 1.727284551  
H 5.910400867 6.856894493 2.382056952  
H 4.372479439 4.082111359 4.352067471  
H 3.545905590 5.599938869 4.742722034  
H 5.195626736 5.624319077 4.112843990  
H 4.242070675 6.594213009 -1.202503085  
H 2.569844961 6.165595531 -1.580458045  
H 2.927657604 7.658296108 -0.690929592  
H 1.292324543 2.688174009 2.316517115  
H 2.383829832 2.926367521 3.690277815  
H 0.934551299 3.933133841 3.526167870  
H 1.275916338 3.381566286 -0.313506871  
H 0.818529427 5.011107922 -0.831989348  
H 0.090795398 4.317129612 0.621498883  
Rh 4.203639984 3.909309149 0.927374899  
C 3.694091320 0.278270900 -1.326508999  
H 4.319140911 -0.597787738 -1.497520328  
H 2.764073372 -0.020448379 -0.829325318  
H 3.414263248 0.730200350 -2.284399986

=====  
6  
=====

O -0.119900540 -1.845253706 -0.315487593  
N 1.918141484 -2.902191877 -0.885526657  
N 4.092808723 -2.348413467 -0.488845468  
C 0.629855871 -2.773025751 -0.857640564  
C 3.516207933 0.085836001 0.692320108

C 4.846318245 -0.311625808 0.535026550  
C 2.467901468 -0.730573356 0.266778916  
C 5.068336487 -1.551406622 -0.060587011  
C 2.796925068 -1.969681382 -0.347293794  
H 5.670867920 0.314781994 0.863336980  
H 6.083200932 -1.923200488 -0.204354838  
H 3.299955606 1.042420745 1.159868836  
C 0.379716337 2.208183050 0.552886605  
C -1.001930475 1.723095179 0.610524416  
C 0.926155925 1.841000795 -0.714755774  
C -1.258790731 0.987757087 -0.556947291  
C -0.033182319 0.989965260 -1.359121323  
C 0.991970718 3.143909931 1.552084088  
C -1.926825047 1.980768681 1.758404493  
C 2.233789921 2.272458076 -1.305031538  
C -2.479213953 0.200772747 -0.920898974  
C 0.094145693 0.348605186 -2.706564426  
H 0.722794890 4.185508251 1.331741929  
H 0.642446935 2.923847198 2.564343214  
H 2.082967997 3.078000546 1.547687054  
H -2.869462967 1.443134189 1.641827345  
H -2.153670549 3.050124168 1.845469594  
H -1.468814135 1.661241651 2.700691462  
H 2.060950994 3.043737650 -2.065681696  
H 2.903831482 2.688673496 -0.551011264  
H 2.750135183 1.434320092 -1.777177215  
H -2.207778215 -0.856297433 -1.024682999  
H -2.899040461 0.542175829 -1.874220729  
H -3.255393028 0.277760267 -0.156703576  
H -0.394482374 -0.628322840 -2.703406811  
H 1.141503096 0.199865133 -2.976249695  
H -0.377845407 0.967304647 -3.480206966  
Rh 0.548163116 -0.069603965 0.476420015  
C -1.251272917 -1.962113142 2.419909000  
C -2.528375864 -1.488355637 2.769027472  
C -1.102498174 -3.294738770 1.992675066  
H -2.640962362 -0.465255290 3.109175444  
H -0.117936075 -3.655004740 1.719576836  
C -3.635131598 -2.328761578 2.681528330  
C -2.213900089 -4.128344059 1.913092971  
H -4.618309498 -1.954900146 2.953219414  
H -2.090887308 -5.155007839 1.580951929  
C -3.482145548 -3.648039818 2.249182463  
H -4.347848415 -4.300374031 2.178864479  
C 0.900289178 -0.422675759 2.719959259  
C -0.109477647 -1.100108266 2.481716871  
C 2.003456116 0.109120078 3.534590244  
H 1.822360635 -0.109966286 4.592412949  
H 2.947067976 -0.353800505 3.234205961  
H 2.110197067 1.190763116 3.413297892  
C -0.203606725 -3.836049557 -1.547880054  
H -0.707887352 -3.396186352 -2.417040825  
H 0.426891178 -4.663800716 -1.872200131  
H -0.987510026 -4.193233490 -0.872247040

=====

6-TS

=====

O -0.141006842 -1.556524754 -1.128042579  
N 1.930088162 -2.677805901 -1.220389724  
N 4.007361889 -1.702476740 -1.223269820  
C 0.637880504 -2.583430052 -1.339128017  
C 3.339665413 0.158791319 0.738710105  
C 4.646527290 0.089693978 0.261400968  
C 2.353619337 -0.675579250 0.203487858  
C 4.909082890 -0.849152029 -0.739785850  
C 2.736639023 -1.661654830 -0.753883898  
H 5.430979729 0.732590377 0.649750113  
H 5.910243034 -0.929740489 -1.164161801  
H 3.076810122 0.859974861 1.526575804  
C 0.236316085 2.143812895 0.870686829  
C -1.114027619 1.622307301 0.832639277  
C 0.742910087 2.181687355 -0.488013327  
C -1.383671165 1.220784307 -0.502458572  
C -0.222121879 1.574206114 -1.323279142  
C 0.882137835 2.774899721 2.067944765  
C -2.044085503 1.524711728 2.004035711  
C 2.061465025 2.743509293 -0.923136115  
C -2.623631239 0.582124412 -1.048476696  
C -0.134863287 1.302789092 -2.793286324  
H 0.539405525 3.809838533 2.196729660  
H 0.637945771 2.229063749 2.983063698  
H 1.970109463 2.801521301 1.970805168  
H -2.781307936 0.731408775 1.865151048  
H -2.581457138 2.470705032 2.147181273  
H -1.501872778 1.305778027 2.927607775  
H 1.954107881 3.794377327 -1.219482183  
H 2.803468943 2.695479631 -0.124215968  
H 2.468018532 2.189964771 -1.772339702  
H -2.354202271 -0.284480482 -1.661000371  
H -3.184272528 1.284638762 -1.677855134  
H -3.282284021 0.236491859 -0.249074832  
H -0.327948183 0.241723865 -2.984828711  
H 0.852637827 1.545143366 -3.191571712  
H -0.879812896 1.889870644 -3.344359875  
Rh 0.350222051 -0.008308955 0.198408023  
C -1.351432323 -1.804900289 2.133922100  
C -1.683750510 -1.756774664 3.498140335  
C -2.328855515 -2.191764116 1.198482990  
H -0.931578755 -1.447925568 4.218320370  
H -2.057042360 -2.207583189 0.148087263  
C -2.971371651 -2.089508057 3.917859316  
C -3.609645605 -2.528220415 1.627549648  
H -3.221624851 -2.043375969 4.974203587  
H -4.358129501 -2.828075647 0.899078012  
C -3.937227726 -2.475212097 2.986088991  
H -4.940360546 -2.730664730 3.315603733  
C 1.228341579 -1.540309906 1.783924222  
C -0.032237563 -1.422525406 1.677425146  
C 2.342734098 -2.172154427 2.527425289  
H 1.912387133 -2.784309626 3.329197168  
H 2.943831682 -2.807530642 1.870695353  
H 3.007126093 -1.424460292 2.970211029  
C -0.110563904 -3.806286812 -1.827598333  
H 0.582466185 -4.600820065 -2.105594158  
H -0.781257331 -4.162050724 -1.036459208

H -0.736084521 -3.537613392 -2.685750961

=====

6A-TS'

=====

O -0.756451218 -2.385089860 0.366871603  
N 0.990388657 -3.298284837 -0.898044873  
N 2.464278669 -2.352015844 -2.357116341  
C -0.008270367 -3.356269078 -0.030278891  
C 2.356044563 0.161492335 -1.110668281  
C 3.226876775 -0.061533207 -2.159690906  
C 1.472023459 -0.863440227 -0.714368262  
C 3.214910227 -1.345276441 -2.760061660  
C 1.608407834 -2.174945081 -1.305055157  
H 3.903866554 0.708503876 -2.515301181  
H 3.882648253 -1.555271760 -3.594902686  
H 2.319991610 1.120561192 -0.603603109  
C -2.089649692 1.206441890 0.300815442  
C -2.633130115 0.044536095 -0.294565090  
C -1.024580462 1.700032848 -0.571264599  
C -1.951179770 -0.174861827 -1.568311561  
C -1.018388789 0.891289999 -1.764376667  
C -2.580681050 1.875099868 1.546924960  
C -3.692712706 -0.861171422 0.245190682  
C -0.276316811 2.985068642 -0.386306815  
C -2.266576487 -1.280871774 -2.525975889  
C -0.208444737 1.125577491 -2.999658898  
H -3.429925365 2.524637716 1.302873865  
H -2.922970883 1.151127191 2.290120749  
H -1.815421096 2.503581548 2.003788619  
H -3.299092667 -1.879800417 0.340338406  
H -4.550859322 -0.896772999 -0.435312422  
H -4.046094280 -0.536664389 1.225260249  
H -0.864164363 3.824905311 -0.776052412  
H -0.073420757 3.189227519 0.667246593  
H 0.677098299 2.974716580 -0.918866255  
H -1.420022501 -1.502812175 -3.179288756  
H -3.118152370 -1.003162682 -3.160091742  
H -2.532914524 -2.195670214 -1.991442226  
H 0.102597786 0.186067166 -3.462179483  
H 0.688335131 1.710747058 -2.793629609  
H -0.809775845 1.677511294 -3.732129228  
Rh -0.384447220 -0.375418214 0.021914976  
C 1.596437980 -0.809570534 1.426385272  
C 0.722948015 0.047598844 1.789010758  
C -0.355399604 -4.722404580 0.504410902  
H -0.471540723 -5.424756943 -0.325088133  
H 0.476257825 -5.081590719 1.119562894  
H -1.265697511 -4.686787165 1.104153212  
C 0.417918630 0.965463329 2.912283241  
H -0.598248729 0.806547573 3.280392174  
H 1.124929830 0.798013783 3.731816084  
H 0.502988280 2.011329000 2.599647366  
C 2.426896103 -1.941996927 1.739099801  
C 1.931559474 -2.892157860 2.654596855  
C 3.711212575 -2.102024975 1.185710087  
C 2.720774411 -3.979593263 3.017722556  
C 4.491132681 -3.189334487 1.557408909

C 3.996884577 -4.129636459 2.468658420  
H 0.931947655 -2.768315972 3.058545964  
H 4.078944538 -1.378259718 0.466224249  
H 2.340093601 -4.712167398 3.722704272  
H 5.482046406 -3.313482627 1.132483061  
H 4.607323642 -4.983627602 2.746364951

=====

7

=====

O -1.010213852 -2.467218399 -0.204885960  
N 1.051443338 -3.318187952 -0.875898421  
N 1.881546378 -1.996734619 -2.600168228  
C -0.120870724 -3.414292097 -0.324399769  
C 2.566235304 0.065442309 -0.829704762  
C 2.879452229 0.168629721 -2.173961401  
C 1.901561379 -1.079889178 -0.336082995  
C 2.507842779 -0.901703477 -3.008149385  
C 1.577750683 -2.121274471 -1.279727221  
H 3.401342869 1.030902624 -2.576495647  
H 2.741886854 -0.860431433 -4.072471142  
H 2.829118967 0.851643384 -0.126661360  
C -1.548784494 1.425716758 0.242446482  
C -2.457073689 0.377347857 -0.159275636  
C -0.707710803 1.697090507 -0.880047500  
C -2.277807951 0.141664669 -1.598955035  
C -1.213451743 0.939835668 -2.035130739  
C -1.519549131 2.101177216 1.578374863  
C -3.559018135 -0.222396746 0.657157540  
C 0.360155851 2.744532347 -0.970824718  
C -3.049555063 -0.889177024 -2.362921715  
C -0.611302555 1.008844614 -3.403498650  
H -2.23353376 2.934594393 1.597636938  
H -1.781047702 1.409174442 2.381510973  
H -0.527570903 2.501035213 1.801181912  
H -3.676575661 -1.282140613 0.415005952  
H -4.511440277 0.282945514 0.449021250  
H -3.352705956 -0.143620074 1.726272225  
H -0.051335581 3.683144331 -1.364792347  
H 0.800200939 2.954200983 0.007085164  
H 1.160550475 2.424036980 -1.641858101  
H -2.730627060 -0.943228066 -3.405845165  
H -4.123944759 -0.671754599 -2.342598438  
H -2.893087387 -1.874806166 -1.909537911  
H -1.060792923 0.278248996 -4.078922272  
H 0.465134263 0.809911668 -3.367732286  
H -0.746141315 2.006953001 -3.838873148  
Rh -0.469404876 -0.437480301 -0.276483566  
C -0.203296989 -0.846210957 2.794645548  
C 0.275204182 -0.059991699 3.857166767  
C -1.377085805 -1.600135684 2.988585472  
H 1.173417330 0.533382952 3.709821224  
H -1.743589044 -2.198738337 2.159775257  
C -0.398903221 -0.028885841 5.078904629  
C -2.043624163 -1.570224762 4.211079121  
H -0.018456275 0.587998867 5.888874531  
H -2.944894552 -2.162734747 4.347229004  
C -1.560686231 -0.781464756 5.260526180

H -2.086802244 -0.753731608 6.210779190  
C 1.688624144 -1.255840659 1.145956516  
C 0.461691439 -0.859989047 1.494135976  
C 2.766453028 -1.872124195 1.997218966  
H 3.021831512 -2.869398832 1.617386103  
H 3.686804056 -1.273689389 1.980126262  
H 2.434800386 -1.967235804 3.035063028  
C -0.557093203 -4.754016876 0.221126884  
H 0.128500238 -5.545516968 -0.084178776  
H -0.583056092 -4.696825981 1.315474749  
H -1.571394444 -4.983187199 -0.119324945

=====

7A'

=====

O -0.726712215 -2.497831029 -0.177906822  
N 1.339322108 -3.096911272 -1.051837124  
N 2.339930524 -1.617405113 -2.507793065  
C 0.223407483 -3.354723341 -0.426425984  
C 2.433285101 0.420504056 -0.566555533  
C 2.925643558 0.640971534 -1.831822760  
C 1.855182510 -0.840944742 -0.236370084  
C 2.864726504 -0.431062607 -2.756429402  
C 1.824210733 -1.862950614 -1.273789271  
H 3.390648460 1.580758558 -2.108925671  
H 3.287301898 -0.301759384 -3.752596047  
H 2.498339306 1.178391100 0.208716430  
C -1.771150457 1.353077800 0.172335037  
C -2.552283795 0.193345136 -0.172111348  
C -0.890758252 1.620136361 -0.928340521  
C -2.239149480 -0.167557523 -1.555203944  
C -1.218921415 0.692333437 -2.014046863  
C -1.936638560 2.198069978 1.396136577  
C -3.638352713 -0.435455611 0.640703889  
C 0.022577390 2.797401165 -1.063516310  
C -2.855764823 -1.327676620 -2.267663260  
C -0.560873515 0.702592467 -3.356603557  
H -2.664027707 2.993747428 1.193696217  
H -2.314073366 1.619229430 2.241458213  
H -1.000235901 2.677520317 1.690656773  
H -3.690325242 -1.509906389 0.449606919  
H -4.610306539 0.002099533 0.379076546  
H -3.480133459 -0.284604236 1.710903988  
H -0.519242894 3.631072518 -1.527725597  
H 0.392472737 3.138501757 -0.094049415  
H 0.880170644 2.565450844 -1.698001241  
H -2.499698466 -1.409303363 -3.295621377  
H -3.946558550 -1.228764032 -2.286318300  
H -2.610311270 -2.258032388 -1.742822679  
H -0.764544446 -0.211358868 -3.916420006  
H 0.524210948 0.803643567 -3.262000297  
H -0.917205531 1.555105767 -3.947670308  
Rh -0.428770935 -0.420486780 -0.120068867  
C 1.622241330 -1.169632618 1.215047199  
C 0.479321890 -0.529043655 1.651440529  
C -0.060115641 -4.770169027 0.000704739  
H 0.696827735 -5.449139016 -0.391897401  
H -0.062394505 -4.816285933 1.095177916

H -1.053354468 -5.072183802 -0.343183268  
C 0.030626388 -0.194725522 3.023978028  
H -0.851732433 -0.789404947 3.294878521  
H 0.819264162 -0.368000393 3.763565574  
H -0.273764304 0.854755171 3.085720968  
C 2.437928541 -2.160554907 1.892743154  
C 1.977626276 -2.843476154 3.042105404  
C 3.719588273 -2.471654442 1.382268230  
C 2.785356093 -3.781313478 3.671059699  
C 4.525894785 -3.401268354 2.023376847  
C 4.061211956 -4.059403532 3.167831351  
H 0.977084099 -2.660432129 3.415682200  
H 4.080353015 -1.966539475 0.492462630  
H 2.422042893 -4.304864922 4.549745164  
H 5.514781553 -3.619827932 1.632819809  
H 4.690919207 -4.792026836 3.663422948

=====

7-TS

=====

O -1.161285281 -2.986656666 0.086140499  
N 0.711496472 -3.413915634 -1.154556513  
N 1.822986603 -2.713329077 -3.044315100  
C -0.220408991 -3.773559809 -0.338751704  
C 3.610866547 -1.208989739 -1.520502687  
C 3.841259718 -1.401488423 -2.888012171  
C 2.491461992 -1.753369212 -0.900074065  
C 2.888231277 -2.120584965 -3.599755049  
C 1.648994684 -2.599971771 -1.708548188  
H 4.705143452 -0.971817672 -3.384328604  
H 2.980026960 -2.241369486 -4.678934574  
H 4.290111065 -0.591158450 -0.938578784  
C -2.047876358 0.311732620 -0.609001100  
C -2.436410427 -0.449072361 -1.808892727  
C -0.814382195 1.013965368 -0.902933598  
C -1.394917369 -0.340946615 -2.735416412  
C -0.349302590 0.520974994 -2.153944492  
C -2.914541483 0.513692379 0.594350100  
C -3.674371481 -1.287266850 -1.895309687  
C -0.169328436 2.060799360 -0.051616412  
C -1.242112279 -1.035518289 -4.052917480  
C 0.907754123 0.914900899 -2.864032269  
H -3.590308189 1.366256833 0.444020361  
H -3.525763273 -0.372407407 0.783250928  
H -2.314861536 0.699835777 1.487876058  
H -3.731529474 -1.821345329 -2.845969200  
H -4.573322296 -0.668096542 -1.796189427  
H -3.687478065 -2.031633854 -1.091577530  
H -0.537328005 3.054164648 -0.337703407  
H -0.389340043 1.906904578 1.005978584  
H 0.916661918 2.053027153 -0.169971719  
H -0.346092612 -1.668594122 -4.049209595  
H -1.132289171 -0.303995907 -4.862294197  
H -2.103165627 -1.668019772 -4.278885841  
H 1.311712503 0.077196665 -3.435944796  
H 1.678388357 1.232823849 -2.159364700  
H 0.714617074 1.741619945 -3.560351133  
Rh -0.510713637 -1.158518791 -0.730014563

C 0.357787013 -0.671777487 2.124205828  
C 0.915316284 0.435698420 2.791790962  
C -0.727492511 -1.333214879 2.733592987  
H 1.745038629 0.962586403 2.329464436  
H -1.173844457 -2.177209139 2.218176603  
C 0.410816699 0.866876900 4.019611359  
C -1.222143650 -0.906830788 3.963797331  
H 0.854755998 1.728652000 4.511629581  
H -2.055935860 -1.436271191 4.418368816  
C -0.660676956 0.197507367 4.612209797  
H -1.056025743 0.532646716 5.567263603  
C 2.130914927 -1.421590209 0.503421307  
C 0.854364276 -1.091894388 0.803585649  
C 3.258974075 -1.457984924 1.518441081  
H 2.883722305 -1.381886840 2.540375471  
H 3.827076435 -2.390541792 1.421317697  
H 3.971446991 -0.635884702 1.367268920  
C -0.296645522 -5.207441807 0.136129826  
H -1.288916588 -5.614818573 -0.081995785  
H 0.469437093 -5.820914268 -0.339650333  
H -0.164474934 -5.228217602 1.223147392

8

O -0.886975706 -3.253811359 -1.008996129  
N 0.780735672 -2.219003201 -1.991114736  
N 2.713162899 -2.024779320 -3.299052954  
C 0.253841579 -3.364380360 -1.564263344  
C 4.163525581 -1.147166491 -1.077066183  
C 4.769895077 -1.243599176 -2.330316782  
C 2.812091112 -1.478823185 -0.920717478  
C 4.008173466 -1.689667463 -3.405896902  
C 2.146528482 -1.927618384 -2.096106291  
H 5.812663555 -0.973321319 -2.467730045  
H 4.445073605 -1.781873822 -4.398787022  
H 4.741747856 -0.801817060 -0.225726306  
C -2.335951328 0.368351281 -0.710505962  
C -2.424544811 -0.101341143 -2.098188162  
C -1.155340075 1.145636201 -0.583296597  
C -1.276910543 0.329293460 -2.786227226  
C -0.421835452 1.026797533 -1.825953126  
C -3.396780968 0.165938303 0.330083668  
C -3.553842306 -0.934183359 -2.625717640  
C -0.751376271 1.975343347 0.593451738  
C -0.885393858 0.061036047 -4.208234787  
C 0.867676258 1.709869146 -2.171008587  
H -4.178320885 0.933420360 0.252373934  
H -3.877201557 -0.809307039 0.211116433  
H -2.976711512 0.202785417 1.337810040  
H -3.358756781 -1.278791308 -3.643446445  
H -4.490880966 -0.363431543 -2.632892370  
H -3.709147215 -1.818857312 -1.999593019  
H -1.090042114 3.009999037 0.452579379  
H -1.183141351 1.597965598 1.521409750  
H 0.334301770 1.991284490 0.715614438  
H 0.093777359 -0.427385956 -4.255783558  
H -0.825478435 0.995827854 -4.779173851

H -1.605367064 -0.592406154 -4.704426765  
H 1.439665675 1.116558671 -2.889743090  
H 1.490635514 1.847862124 -1.284233928  
H 0.683643997 2.696266413 -2.617101669  
Rh -0.540197194 -0.976865113 -1.035120845  
C 0.079840019 -1.163688421 1.816954970  
C 0.394033790 -0.200757980 2.792832613  
C -0.981276035 -2.052954674 2.082480907  
H 1.205002666 0.495696574 2.602676630  
H -1.233018041 -2.799009562 1.334453940  
C -0.331587046 -0.116347954 3.982125998  
C -1.695722222 -1.975471139 3.275253296  
H -0.076394208 0.645078182 4.715099812  
H -2.506470919 -2.675751448 3.460446835  
C -1.381294847 -1.001981854 4.228950024  
H -1.948235750 -0.936375737 5.153708458  
C 2.122041225 -1.415081501 0.390365005  
C 0.780343831 -1.221122026 0.517433226  
C 3.038068771 -1.581369638 1.596690774  
H 2.473975420 -1.816896319 2.499570370  
H 3.763911724 -2.384988308 1.425715923  
H 3.615059137 -0.669481397 1.801874757  
C 0.960976660 -4.686280727 -1.691212773  
H 1.837337971 -4.689913273 -1.032660842  
H 0.288300574 -5.494589329 -1.402912736  
H 1.317167759 -4.831396580 -2.714955807

9

O -0.851005793 -2.964907169 -2.393712759  
N 1.275315046 -2.263259172 -2.028071642  
N 3.330939054 -3.382366419 -2.443903685  
C 0.358849555 -3.223742008 -2.388406754  
C 4.576178074 -1.728410363 -0.574146748  
C 5.326061726 -2.643962622 -1.321717143  
C 3.196656942 -1.646742225 -0.753148913  
C 4.650981903 -3.458919764 -2.219460726  
C 2.617979765 -2.484836102 -1.757116199  
H 6.401618481 -2.720399380 -1.198846340  
H 5.189133644 -4.198309898 -2.811070204  
H 5.076581478 -1.098750591 0.154042020  
C -1.585214019 0.268800288 -1.916405797  
C -0.728488147 0.210934624 -3.083675623  
C -1.015724778 1.210353017 -1.010823846  
C 0.328989267 1.151582599 -2.930502653  
C 0.191165239 1.729010105 -1.619711995  
C -2.840861320 -0.527079880 -1.743565321  
C -0.979426503 -0.609444201 -4.312479019  
C -1.590878963 1.675936341 0.295502514  
C 1.385711193 1.472790360 -3.946052074  
C 1.061985373 2.804802656 -1.041516662  
H -3.600857019 -0.226932973 -2.476314306  
H -2.620842934 -1.587193012 -1.891978741  
H -3.270121098 -0.388985217 -0.747418284  
H -0.041517839 -1.000797629 -4.716631889  
H -1.447088480 0.008840175 -5.090301991  
H -1.620876670 -1.461144805 -4.093384743

H -2.132836819 2.622119188 0.169809103  
H -2.286939383 0.946259439 0.713353634  
H -0.808993518 1.839717388 1.042491794  
H 2.293502331 1.856545806 -3.472128630  
H 1.037957549 2.233503819 -4.658462524  
H 1.664020419 0.585319936 -4.521348476  
H 2.101311684 2.690785646 -1.361157179  
H 1.044364929 2.790918827 0.051373579  
H 0.719897151 3.796187639 -1.366584420  
Rh 0.571855903 -0.443404198 -1.270730138  
C 0.340802372 -1.203465581 1.721525431  
C 1.029254556 -1.230464220 2.955537796  
C -1.059255362 -1.395967484 1.724998116  
H 2.108006239 -1.121966124 2.965799809  
H -1.571656823 -1.430825114 0.769305170  
C 0.334127992 -1.395680547 4.147981167  
C -1.748223543 -1.566968918 2.919233561  
H 0.872798800 -1.406260371 5.091366768  
H -2.823783398 -1.718150496 2.907679558  
C -1.055027008 -1.558947206 4.134087086  
H -1.593532443 -1.695394874 5.067820549  
C 2.346949100 -0.753474474 0.082782261  
C 1.024058819 -1.063300729 0.464849502  
C 3.069002390 0.346400231 0.850203335  
H 3.753154039 -0.058671594 1.606783748  
H 3.664906502 0.956107140 0.163127035  
H 2.355586052 0.998763680 1.358589530  
C 0.808588684 -4.623910427 -2.782287359  
H 1.442792177 -5.077793598 -2.016283512  
H -0.092290081 -5.220847130 -2.933236837  
H 1.408041120 -4.598253727 -3.694841146

=====

9-TS

=====

O -0.931216359 -2.920465708 -2.041735649  
N 1.216225743 -2.249705076 -1.775106311  
N 3.225296021 -3.174083471 -2.720206738  
C 0.266266704 -3.207529783 -2.076451778  
C 4.647362232 -1.373619080 -1.075324416  
C 5.313996792 -2.199860573 -1.995781541  
C 3.264164448 -1.466290474 -0.987806737  
C 4.572829247 -3.081073523 -2.771329641  
C 2.606122017 -2.371631384 -1.867461085  
H 6.394397259 -2.161532640 -2.094902754  
H 5.063249111 -3.740660906 -3.484057665  
H 5.201073647 -0.688628912 -0.439909995  
C -1.453331470 0.596303642 -2.033182144  
C -0.534306943 0.601844847 -3.165383339  
C -0.924984992 1.472278237 -1.057867169  
C 0.490602285 1.566267252 -2.939368010  
C 0.317983180 2.024653673 -1.586479783  
C -2.728375196 -0.188533172 -1.972887039  
C -0.736983418 -0.229897231 -4.397503376  
C -1.532257080 1.798177958 0.274865955  
C 1.560804367 1.994004011 -3.900922298  
C 1.167583466 3.055535078 -0.902338564  
H -3.472615957 0.213300228 -2.673378706

H -2.546367884 -1.235410929 -2.227625132  
H -3.168112755 -0.153525978 -0.971870661  
H 0.180819288 -0.306662560 -4.985555172  
H -1.513400078 0.207761630 -5.038601875  
H -1.053337812 -1.240013957 -4.123552799  
H -2.271715641 2.604706764 0.187727332  
H -2.035945177 0.928042352 0.705472350  
H -0.772173762 2.124488354 0.989504039  
H 2.487146854 2.255780697 -3.381114721  
H 1.251712680 2.872627497 -4.484015942  
H 1.800221443 1.197243690 -4.610528946  
H 2.200405598 3.013625622 -1.258492708  
H 1.182345986 2.907675028 0.180945784  
H 0.788500726 4.067815304 -1.095336795  
Rh 0.658206642 -0.150106683 -1.388048410  
C 0.317031920 -1.987772822 1.116735578  
C 0.994152367 -2.524181604 2.231604338  
C -1.078173757 -2.159579754 1.004350066  
H 2.071914196 -2.411903858 2.300389290  
H -1.573874474 -1.778393388 0.119673230  
C 0.285236299 -3.184921026 3.228660822  
C -1.776628137 -2.842027426 1.994430423  
H 0.807440758 -3.586820841 4.092226982  
H -2.849459648 -2.982974529 1.900412798  
C -1.099632978 -3.345681667 3.109507084  
H -1.650353312 -3.871535063 3.884803295  
C 2.366585732 -0.779711843 -0.056355134  
C 1.039760232 -1.294813991 0.082843848  
C 2.963832617 0.058771312 1.055015326  
H 3.702593803 -0.509344757 1.637557268  
H 3.478154659 0.932527065 0.638577104  
H 2.190926552 0.420956582 1.737770557  
C 0.714862883 -4.619937420 -2.405238628  
H 1.443950057 -4.984353065 -1.675726771  
H -0.169931889 -5.258056641 -2.414610147  
H 1.215445876 -4.643425465 -3.375608921

=====

10

=====

O -1.003939271 -3.184041023 -1.539068937  
N 1.228377104 -2.764410973 -1.348743200  
N 3.052519798 -3.613644123 -2.724562168  
C 0.140656441 -3.536498785 -1.783317566  
C 4.536706924 -1.415842414 -1.723267436  
C 5.105214119 -2.336808920 -2.620182753  
C 3.212759495 -1.605984211 -1.352663398  
C 4.336256504 -3.393885851 -3.094126940  
C 2.547805786 -2.741099834 -1.874814391  
H 6.136504650 -2.231309652 -2.942551851  
H 4.753829956 -4.116755962 -3.790613890  
H 5.111147881 -0.579834402 -1.334541321  
C -1.371394873 0.753070474 -2.504169226  
C -0.209850669 1.203855395 -3.287099123  
C -1.201077223 1.198787451 -1.188241243  
C 0.626766622 2.001006603 -2.477214813  
C 0.106290266 1.870703578 -1.126662850  
C -2.493317366 -0.069485828 -3.063735962

C -0.041570056 0.921377301 -4.750504494  
C -2.147462845 1.092253923 -0.031790927  
C 1.835871935 2.790922880 -2.880966663  
C 0.604465485 2.616903305 0.073414154  
H -3.021716118 0.466322064 -3.862515450  
H -2.123016357 -1.011483312 -3.481911182  
H -3.220255852 -0.329270959 -2.291091442  
H 0.994108260 1.060945511 -5.070136547  
H -0.673414469 1.585974455 -5.354312420  
H -0.333435178 -0.106590152 -4.987885475  
H -2.573607445 2.075333834 0.209361851  
H -2.975473881 0.413030833 -0.248443604  
H -1.646242619 0.719247699 0.865781188  
H 2.606961250 2.761496544 -2.105195045  
H 1.586690187 3.846548557 -3.057500124  
H 2.280261993 2.398947239 -3.799670935  
H 1.691215754 2.728280783 0.056250010  
H 0.329824209 2.105132580 0.999436855  
H 0.164194718 3.622651577 0.104961433  
Rh 0.642413914 -0.140248448 -1.656028867  
C 0.391572744 -1.981459975 0.929988146  
C 1.171716452 -2.348443985 2.037222385  
C -0.998711228 -1.908503056 1.085763931  
H 2.249219656 -2.427119732 1.925630093  
H -1.599939227 -1.659173608 0.222398102  
C 0.583094001 -2.613622665 3.273806334  
C -1.589441657 -2.174639225 2.320022583  
H 1.205714941 -2.893715620 4.119530201  
H -2.669687033 -2.112813473 2.422740936  
C -0.801723063 -2.522532940 3.419714212  
H -1.264619350 -2.727665663 4.381317139  
C 2.299974203 -0.878672898 -0.472151995  
C 1.073794127 -1.665007949 -0.361400962  
C 2.853637695 0.020906178 0.604257703  
H 3.589400291 -0.504638195 1.228607178  
H 3.360297203 0.885856092 0.161457360  
H 2.060994864 0.390312016 1.257094026  
C 0.442431629 -4.815813541 -2.531429768  
H -0.492962599 -5.369678974 -2.617959976  
H 0.851447523 -4.596492290 -3.521074057  
H 1.204440355 -5.407791615 -2.019457817

=====  
2A  
=====

O -0.941248477 -2.133062840 -2.115454197  
N 0.164456576 -2.074794769 -0.121905558  
N 2.376166582 -2.020877600 0.493741482  
C -0.915613413 -2.523089170 -0.967375696  
C 2.890272856 -4.396357059 -0.936978698  
C 3.890838385 -3.768906832 -0.192233130  
C 1.620846152 -3.837353468 -0.957191586  
C 3.574002266 -2.574150324 0.494472414  
C 1.384817600 -2.648569345 -0.202726394  
H 4.895867825 -4.174000740 -0.142279163  
H 4.343835831 -2.053431273 1.060442328  
H 3.098268270 -5.304162025 -1.493966341  
C 0.236615464 1.812227964 1.495146513

C -0.993210018 1.783447385 0.762436926  
C 1.297367573 1.339884996 0.611407578  
C -0.720642686 1.255985975 -0.563085496  
C 0.705603838 1.019331336 -0.655229509  
C 0.447661519 2.250915766 2.909499884  
C -2.341484547 2.165105581 1.280167818  
C 2.739726305 1.258137345 0.989865422  
C -1.700363874 1.115240932 -1.684773922  
C 1.414470911 0.504495502 -1.866554260  
H 0.947981954 3.226064444 2.928970575  
H -0.495722473 2.343251467 3.449357271  
H 1.077766180 1.536220551 3.445538044  
H -3.125762463 1.548004389 0.837386191  
H -2.550530434 3.211629391 1.027637601  
H -2.398575068 2.058832407 2.364623308  
H 3.173890829 2.265294313 1.004666448  
H 2.852890730 0.824836731 1.986459374  
H 3.305042267 0.645890176 0.288140476  
H -1.483694553 0.234406918 -2.292734146  
H -1.650193810 1.997743964 -2.334449530  
H -2.723855257 1.030663371 -1.314452291  
H 0.794974685 -0.217419714 -2.402724743  
H 2.354856491 0.020701442 -1.597908854  
H 1.639635444 1.338582873 -2.541391611  
Rh -0.165332615 -0.254351884 0.909093142  
H 0.823026419 -4.289134502 -1.536328554  
C -0.881323278 -1.599510908 2.930584669  
O -1.753242373 -1.242229462 2.059127569  
O 0.331735283 -1.271844983 2.795485735  
O -1.240131140 -2.330733061 3.981782436  
H -2.198587894 -2.476527214 3.942963123  
C -1.937739372 -3.389466286 -0.298384547  
H -2.730865717 -3.635451794 -1.005332112  
H -1.460853577 -4.306033611 0.068329953  
H -2.337979794 -2.861756086 0.573386908

=====  
2A'  
=====

O 0.455900759 -2.036888838 -1.848177314  
N 1.256615520 -1.965065956 0.304309130  
N 3.074305058 -3.300863743 -0.190172359  
C 0.588506937 -2.634383202 -0.806556225  
C 4.442020416 -2.312029362 2.070383549  
C 5.041121483 -3.228477001 1.201808929  
C 3.153308868 -1.875692606 1.799754620  
C 4.302077770 -3.697175503 0.090776980  
C 2.497459888 -2.381992817 0.638363481  
H 6.046767712 -3.596356153 1.375115395  
H 4.740745544 -4.425373554 -0.588105023  
H 4.969151497 -1.955439568 2.949503183  
C 0.171389535 1.834306240 1.653616071  
C -0.912634909 1.568415761 0.763273418  
C 1.414221287 1.550212145 0.945091486  
C -0.356886566 1.126173019 -0.512481987  
C 1.075171590 1.165264726 -0.403245360  
C 0.075661995 2.291193008 3.073236227  
C -2.372827053 1.696165919 1.053433418



C 2.793186665 1.757748961 1.487868190  
 C -1.143770576 0.803888857 -1.740057826  
 C 2.039072275 0.843885601 -1.499068975  
 H 0.209860101 3.378191710 3.121583700  
 H -0.893786788 2.048169136 3.510232210  
 H 0.846306980 1.826367378 3.691613436  
 H -2.921413898 0.824877918 0.686506331  
 H -2.773434639 2.582871437 0.548589110  
 H -2.566809893 1.796530724 2.121994495  
 H 3.132309914 2.778094769 1.270873427  
 H 2.818674803 1.623167992 2.571720123  
 H 3.508392096 1.065002322 1.040568709  
 H -0.629428744 0.065763026 -2.356191874  
 H -1.288000584 1.715193868 -2.333465815  
 H -2.130304337 0.411309808 -1.485092402  
 H 1.689804673 -0.005561636 -2.086820602  
 H 3.031198502 0.613089502 -1.107074857  
 H 2.133361816 1.714071393 -2.159636736  
 Rh 0.245629385 -0.279003382 1.054139137  
 H 2.624671936 -1.202034712 2.462214708  
 C -0.805743515 -1.849844813 2.733639717  
 O -1.358663797 -1.705839753 1.591380954  
 O 0.246889606 -1.200649261 3.029180765  
 O -1.305858374 -2.685861111 3.636230230  
 H -2.111999989 -3.085955381 3.272761822  
 C -0.010290878 -3.967466593 -0.469589233  
 H -0.391684085 -4.430396557 -1.380334735  
 H 0.724090993 -4.616877079 0.011351568  
 H -0.832758725 -3.789009094 0.232294574

=====  
 3A-TS  
 =====

O 0.132006213 -2.150609732 -0.532799363  
 N 2.269291639 -3.005424738 -0.370823801  
 N 4.175493717 -2.306785107 0.667258918  
 C 0.943559885 -3.112353086 -0.619350195  
 C 2.678942442 -1.369238019 2.881234884  
 C 4.068160057 -1.377694726 2.901884794  
 C 1.985552073 -1.839150786 1.751769304  
 C 4.762688160 -1.824809551 1.741259694  
 C 2.802751064 -2.380141258 0.678485632  
 H 4.628467560 -1.042800426 3.769508362  
 H 5.850765228 -1.784763217 1.718182325  
 H 2.119835377 -1.004348278 3.738594532  
 C 1.084621429 1.486088514 1.509766102  
 C -0.315445691 1.535837054 1.190169930  
 C 1.805633783 1.129270196 0.295544565  
 C -0.478483945 1.185135365 -0.201308131  
 C 0.840550244 0.955248415 -0.752795756  
 C 1.696978331 1.879113674 2.817188501  
 C -1.439929128 1.837972760 2.127617836  
 C 3.291677713 1.072435141 0.138745070  
 C -1.771859527 1.123425364 -0.948701978  
 C 1.129248142 0.579706430 -2.169445276  
 H 1.787548661 2.970663309 2.867074728  
 H 1.082326412 1.556421399 3.660240889  
 H 2.694094896 1.454893112 2.938422918

H -2.136650324 0.995112300 2.165215254  
 H -1.989592671 2.718629599 1.778366685  
 H -1.084247470 2.033622742 3.139801025  
 H 3.665367603 2.050590277 -0.186730638  
 H 3.782181025 0.821693182 1.079607010  
 H 3.593467951 0.332754523 -0.605468750  
 H -1.754689217 0.334702790 -1.704443932  
 H -1.961275578 2.075254679 -1.459944606  
 H -2.607361078 0.929895282 -0.273095280  
 H 0.353476197 -0.078122176 -2.566187143  
 H 2.091139078 0.073150977 -2.264102936  
 H 1.156972647 1.483237147 -2.790569305  
 Rh 0.429718733 -0.515110016 0.832053959  
 H 0.859093487 -2.534865379 2.000790596  
 C -1.145846844 -2.598983526 2.254760027  
 O -1.208899021 -1.381965280 1.883146405  
 O -0.097462684 -3.313879967 2.260458708  
 O -2.256037712 -3.190035582 2.686549902  
 H -2.985949755 -2.554353237 2.622355461  
 C 0.445018113 -4.446461678 -1.087815166  
 H 1.245003819 -5.040525436 -1.529891253  
 H 0.061365131 -4.969450474 -0.202385396  
 H -0.382470429 -4.312869072 -1.787819624

=====

4A

=====

O -0.267630994 -2.492261887 0.337787539  
 N 1.800100207 -3.451508760 -0.059276547  
 N 3.662152052 -3.544146299 1.246992588  
 C 0.559763372 -3.157573462 -0.406000823  
 C 3.141063452 -1.008270502 2.357468605  
 C 4.232512474 -1.759273052 2.765693426  
 C 2.267626762 -1.506908655 1.378970861  
 C 4.450034142 -3.029129028 2.161800861  
 C 2.569608450 -2.825783491 0.845987022  
 H 4.922586918 -1.391401649 3.519040346  
 H 5.320724487 -3.620236158 2.440367222  
 H 2.948763132 -0.041185152 2.812844515  
 C 0.685815334 1.606894135 1.003385067  
 C -0.702887356 1.351004124 0.573334873  
 C 1.567315221 1.156399608 -0.033388987  
 C -0.657559156 0.657193899 -0.640640259  
 C 0.758976698 0.443797052 -0.990334034  
 C 1.048445702 2.392883778 2.223160982  
 C -1.901488543 1.732999086 1.383587003  
 C 3.042443037 1.385316849 -0.119670287  
 C -1.798376322 0.111593142 -1.439229131  
 C 1.243028641 -0.153261140 -2.275798798  
 H 0.851781368 3.459168911 2.056992054  
 H 0.451687217 2.074354172 3.081858873  
 H 2.104840994 2.285237551 2.477510691  
 H -2.824341774 1.338965774 0.954992235  
 H -1.990880847 2.823562622 1.445736289  
 H -1.811320186 1.349903226 2.405261040  
 H 3.232417822 2.321268797 -0.658371031  
 H 3.499647617 1.471823096 0.867727399  
 H 3.544623613 0.578759074 -0.657159805

H -1.739706874 -0.980547547 -1.494181395  
H -1.770972610 0.501443326 -2.462415695  
H -2.762471914 0.371995360 -1.000384331  
H 0.544365764 -0.901415765 -2.654915810  
H 2.220726013 -0.625882030 -2.156804323  
H 1.338191748 0.627881408 -3.040245056  
Rh 0.562200546 -0.572463214 0.918996811  
H -0.607007504 -2.937018633 1.889270186  
C -0.577127159 -1.942365766 3.495118141  
O -0.142160818 -0.881786644 3.002589226  
O -0.789771557 -3.058419228 2.860768557  
O -0.878077209 -2.039236784 4.778517246  
H -0.682469606 -1.190869689 5.205681324  
C 0.038592510 -3.732408047 -1.689160585  
H 0.853562474 -4.073928833 -2.327951670  
H -0.601945221 -4.590624809 -1.452048182  
H -0.583837450 -2.998404980 -2.206216812

=====

5A

=====

O 3.931851625 2.534219980 -0.572903574  
N 5.428389549 0.955360055 0.230643213  
N 7.425673962 1.071027875 1.293866634  
C 4.272275448 1.328995943 -0.331267864  
C 6.930415630 3.691988230 2.192872763  
C 8.129747391 3.049610376 2.473355532  
C 5.931853771 3.045754910 1.446758270  
C 8.319581032 1.723422647 1.997810245  
C 6.237937450 1.695328712 0.998089254  
H 9.241647720 1.191435814 2.225122929  
H 8.910010338 3.537123203 3.049958229  
H 6.781054974 4.710041523 2.537074327  
C 3.986822605 6.069252014 1.633402228  
C 3.689077854 5.073099613 2.599877834  
C 3.006820679 5.957501888 0.527622998  
C 2.633643389 4.241132736 2.028983116  
C 2.167016268 4.868909836 0.787855923  
C 4.989151001 7.172706127 1.747966051  
C 4.258074760 4.917074203 3.974996090  
C 2.997038841 6.861282825 -0.662523150  
C 1.973500371 3.082856655 2.699536085  
C 1.065925956 4.315599918 -0.060281329  
H 5.488544464 7.359661102 0.793628991  
H 4.486241817 8.102100372 2.042677402  
H 5.752202511 6.955320835 2.497483969  
H 4.459411621 3.870099306 4.212295055  
H 3.538282394 5.296818256 4.709689140  
H 5.184237957 5.479957581 4.101076126  
H 4.005940437 6.993715286 -1.065696597  
H 2.360359907 6.477588654 -1.460687518  
H 2.629730463 7.854924679 -0.377832532  
H 1.556337833 2.387446642 1.967901230  
H 2.668588877 2.542573690 3.345447779  
H 1.146743178 3.446317196 3.324017763  
H 1.321701765 3.308491230 -0.407269418  
H 0.880840003 4.935996056 -0.938006043  
H 0.135753095 4.249330997 0.513561606

Rh 4.336575031 4.051974297 0.764440238  
C 3.370352745 0.224750489 -0.799851775  
H 3.817334652 -0.257712990 -1.675916553  
H 3.285765171 -0.543520629 -0.024749495  
H 2.388039112 0.618336856 -1.061487794

=====

6A

=====

O -0.265330344 -1.645060778 -0.500262380  
N 1.558652639 -3.103912830 -0.345539302  
N 3.762512207 -2.793383360 -0.008480417  
C 0.278130740 -2.786572933 -0.606260419  
C 3.520722628 -0.035666782 0.431442380  
C 4.765050411 -0.644281507 0.407455266  
C 2.352710009 -0.784672141 0.209714040  
C 4.821363926 -2.048046589 0.194987774  
C 2.517394304 -2.203670979 -0.041430186  
H 5.676256657 -0.077690013 0.575014293  
H 5.781612873 -2.562050343 0.212832361  
H 3.449220419 1.025156260 0.644878209  
C 0.424392521 2.317361116 0.626461029  
C -0.973639727 1.859791160 0.664288402  
C 0.950066686 2.043640852 -0.674315631  
C -1.261959910 1.238710880 -0.557912529  
C -0.039391998 1.272219539 -1.374668002  
C 1.041414022 3.198767662 1.666959882  
C -1.874260068 2.048135757 1.844211578  
C 2.243702173 2.529729366 -1.249819517  
C -2.520268917 0.556515813 -0.991557598  
C 0.047393896 0.772436321 -2.782703400  
H 0.794005096 4.247601032 1.458259821  
H 0.658093393 2.968366861 2.663599968  
H 2.130995750 3.116870403 1.682658315  
H -2.876754522 1.661661625 1.652579784  
H -1.966803551 3.111164331 2.091804266  
H -1.473182559 1.536534905 2.725394726  
H 2.046996593 3.366542339 -1.930345058  
H 2.926177740 2.891576290 -0.478277564  
H 2.753025293 1.749094725 -1.819772243  
H -2.335842133 -0.514796019 -1.131133914  
H -2.867690802 0.963668227 -1.947073936  
H -3.321196079 0.674141943 -0.259589732  
H -0.490222573 -0.172410607 -2.890846014  
H 1.083642364 0.615841329 -3.089940310  
H -0.404305577 1.498350501 -3.470277309  
Rh 0.539279461 0.061495643 0.365510255  
C -1.043534875 -2.089592934 2.322925568  
C -2.389708757 -1.766950250 2.076720476  
C -0.659711421 -3.439364910 2.449740648  
H -2.676162004 -0.727683604 1.966965318  
H 0.382266372 -3.685612679 2.623007774  
C -3.336086035 -2.779155970 1.962303281  
C -1.617034435 -4.445028305 2.341303110  
H -4.374900818 -2.528993607 1.769652843  
H -1.319019198 -5.483984947 2.441157579  
C -2.952522039 -4.118539810 2.095017910  
H -3.695548534 -4.905383110 2.005587578

C 0.940288603 -0.346229583 2.628109217  
C -0.034584008 -1.079848289 2.409827232  
C 2.030153036 0.247070566 3.417042494  
H 1.872539878 0.021999316 4.476314545  
H 2.990054369 -0.177191436 3.109533310  
H 2.086440325 1.330050588 3.295828104  
C -0.599042654 -3.896888733 -1.120494246  
H -0.650443435 -3.830204248 -2.214253664  
H -0.176220804 -4.865631580 -0.855438352  
H -1.610868454 -3.791073799 -0.723333359

=====

6A-TS

=====

O -0.130141005 -1.583125710 -1.137863398  
N 1.918484807 -2.665590525 -1.216261029  
N 3.996030569 -1.728464842 -1.252047777  
C 0.596704781 -2.639011621 -1.248419642  
C 3.356886387 0.140315160 0.744798362  
C 4.628416061 0.088386424 0.212978452  
C 2.341938496 -0.689323664 0.219451457  
C 4.885232449 -0.868293703 -0.805787861  
C 2.722407103 -1.696326137 -0.752606690  
H 5.422129631 0.737760186 0.568526566  
H 5.883619785 -0.944864154 -1.234219074  
H 3.118246078 0.832469225 1.546361566  
C 0.218975112 2.109863520 0.919315934  
C -1.134529233 1.574225426 0.849148095  
C 0.739199102 2.195886374 -0.422796428  
C -1.399167061 1.229923487 -0.500382245  
C -0.223949239 1.592154145 -1.293984532  
C 0.845141828 2.684114456 2.152760267  
C -2.071889400 1.452523232 2.007807970  
C 2.035270691 2.816953897 -0.840735734  
C -2.640362501 0.619839191 -1.072141290  
C -0.126833007 1.423120737 -2.776560783  
H 0.438549250 3.683630705 2.351271391  
H 0.640997946 2.065456390 3.030301332  
H 1.927169919 2.787982225 2.048036575  
H -2.826629877 0.682791352 1.840634108  
H -2.586119652 2.408627748 2.164098978  
H -1.542190194 1.204783320 2.930219173  
H 1.875286818 3.868442059 -1.108117223  
H 2.777497530 2.788753986 -0.041007109  
H 2.461577892 2.312134504 -1.710455060  
H -2.383836031 -0.217183650 -1.728630781  
H -3.191108704 1.358266711 -1.666538715  
H -3.302413464 0.246026695 -0.289786249  
H -0.501379550 0.441427916 -3.077418327  
H 0.901128709 1.520474553 -3.129800081  
H -0.734267235 2.183633804 -3.282401085  
Rh 0.393651575 0.007337285 0.133894041  
C -1.363409400 -1.789131522 2.095373392  
C -1.669210911 -1.746393681 3.467759609  
C -2.355696440 -2.160026550 1.169170976  
H -0.904865623 -1.448985577 4.179363728  
H -2.111078501 -2.170611858 0.112921715  
C -2.949404001 -2.080702305 3.903985739

C -3.630378246 -2.494201899 1.617186785  
H -3.181887388 -2.046971560 4.963945389  
H -4.392959595 -2.785376787 0.900996447  
C -3.931068182 -2.453065872 2.982418299  
H -4.928506374 -2.708699703 3.326555252  
C 1.224400520 -1.537963152 1.756836414  
C -0.038075019 -1.431420684 1.649380326  
C 2.322253466 -2.146958828 2.553716660  
H 1.860677123 -2.750463247 3.342476606  
H 2.959208965 -2.787935734 1.938293099  
H 2.952570915 -1.383534551 3.018543005  
C -0.129541665 -3.926889181 -1.525769114  
H 0.567851245 -4.725060463 -1.778044105  
H -0.705258429 -4.206286907 -0.635734022  
H -0.843162537 -3.778600216 -2.341909170

=====

7A

=====

O -0.968454480 -2.536342382 -0.407260954  
N 1.154749155 -3.312249660 -0.934606493  
N 2.015661716 -1.966263413 -2.621370316  
C -0.040959802 -3.473664045 -0.470929325  
C 2.500874996 0.141290426 -0.822324157  
C 2.879474163 0.249798596 -2.144782066  
C 1.855792046 -1.038995862 -0.371446133  
C 2.607110739 -0.842070818 -2.999080420  
C 1.650325179 -2.098990679 -1.324851751  
H 3.396145344 1.126441002 -2.520686626  
H 2.899210691 -0.791643977 -4.047143936  
H 2.701603174 0.933156371 -0.106580295  
C -1.625046849 1.339288831 0.309310913  
C -2.536388397 0.311494410 -0.146241829  
C -0.743746519 1.642933965 -0.771353066  
C -2.286249638 0.080069773 -1.561237812  
C -1.175855637 0.877384126 -1.943109274  
C -1.667013645 2.015675306 1.641553044  
C -3.680536032 -0.276949227 0.613248467  
C 0.296915680 2.717982769 -0.797607422  
C -3.044313908 -0.908944309 -2.386936188  
C -0.550712407 0.980797052 -3.294760466  
H -2.353176832 2.869904280 1.589166641  
H -2.021775723 1.346815705 2.426919937  
H -0.685344100 2.390747786 1.936609507  
H -3.815985203 -1.330113411 0.353771210  
H -4.607372761 0.252074540 0.357424617  
H -3.531963110 -0.200452611 1.690826416  
H -0.156454250 3.662546396 -1.122870326  
H 0.734958649 2.881306410 0.189595550  
H 1.098815799 2.477289677 -1.497843981  
H -2.678565979 -0.948024392 -3.413915873  
H -4.108668804 -0.649933994 -2.408447742  
H -2.948105335 -1.910259128 -1.952784061  
H -0.922996640 0.213501498 -3.975023031  
H 0.537338197 0.880562723 -3.233344078  
H -0.762791812 1.963471770 -3.733389378  
Rh -0.504576862 -0.554996252 -0.270280123  
C -0.165458560 -0.658634245 2.821031570

C 0.399540454 0.133196816 3.842647791  
C -1.382412910 -1.334463358 3.064162970  
H 1.333077788 0.655540347 3.655389309  
H -1.801638246 -1.953371644 2.276580572  
C -0.239295110 0.245231628 5.073902130  
C -2.009466887 -1.223866940 4.299808025  
H 0.200103581 0.855047941 5.857336521  
H -2.935740232 -1.758873343 4.487172127  
C -1.444339156 -0.428102583 5.304041862  
H -1.939739585 -0.338108510 6.266070366  
C 1.639832854 -1.268495917 1.100555420  
C 0.467578977 -0.773861945 1.532692432  
C 2.600409269 -2.122777462 1.881122112  
H 2.691558361 -3.105990410 1.407058716  
H 3.596914768 -1.663922548 1.878680348  
H 2.266815662 -2.249351025 2.913347960  
C -0.486289382 -4.823417187 0.023388909  
H 0.286714643 -5.573172092 -0.146008760  
H -0.712594509 -4.760182858 1.093336105  
H -1.407415628 -5.116750717 -0.488784105

=====  
7A-TS  
=====

O -1.079582095 -3.020431995 -0.069440059  
N 0.855914772 -3.681480169 -1.065399051  
N 1.690662861 -2.806299448 -3.008948565  
C -0.174422666 -3.904177904 -0.300757617  
C 3.634189367 -1.391987324 -1.537608981  
C 3.776328802 -1.590581656 -2.894316435  
C 2.473300934 -1.847176194 -0.871875465  
C 2.725764513 -2.245393753 -3.594611645  
C 1.597928643 -2.740354300 -1.639961123  
H 4.633658409 -1.205034852 -3.435569525  
H 2.755181074 -2.303308725 -4.681669235  
H 4.373836517 -0.821202397 -0.984914362  
C -2.091369867 0.277122676 -0.616245568  
C -2.409531116 -0.458910882 -1.849327803  
C -0.878159761 1.051267624 -0.844748437  
C -1.352564335 -0.262897313 -2.742127657  
C -0.360921770 0.628813028 -2.098685503  
C -3.005860329 0.394857645 0.557035685  
C -3.610296011 -1.337537289 -2.005659103  
C -0.330640554 2.107317448 0.060420774  
C -1.160334110 -0.860244036 -4.099164486  
C 0.881865263 1.113050461 -2.774079800  
H -3.737143040 1.193002224 0.372490138  
H -3.558143139 -0.533930123 0.717608452  
H -2.460258722 0.633050740 1.471240759  
H -3.619908571 -1.838873148 -2.974574804  
H -4.529913902 -0.749730408 -1.914024115  
H -3.625288963 -2.108161211 -1.227650046  
H -0.802593946 3.069201708 -0.173499838  
H -0.528312504 1.880049825 1.109199166  
H 0.748314261 2.223797560 -0.062454537  
H -0.267691880 -1.494668603 -4.120721340  
H -1.027124882 -0.067967959 -4.844898701  
H -2.013847589 -1.470724702 -4.397303581

H 1.355088234 0.310883045 -3.345993042  
H 1.607172370 1.496334553 -2.053991556  
H 0.637906194 1.921115279 -3.474968433  
Rh -0.474692583 -1.115379333 -0.753845930  
C 0.401268631 -0.634151936 2.086182594  
C 1.043167353 0.407188773 2.790078640  
C -0.756898880 -1.215827346 2.648734808  
H 1.919021845 0.883950353 2.362358809  
H -1.252971292 -2.016492128 2.109264135  
C 0.537640393 0.853651524 4.008825779  
C -1.235115767 -0.788391292 3.883259058  
H 1.030509830 1.668496370 4.530681133  
H -2.112251043 -1.262268662 4.314226627  
C -0.596334636 0.252891421 4.563281059  
H -0.979705215 0.594587445 5.519979954  
C 2.175403357 -1.445530772 0.488456219  
C 0.866401374 -1.104985714 0.782557547  
C 3.326162100 -1.349277735 1.470840812  
H 2.971460819 -1.451189637 2.497971296  
H 4.067424297 -2.129660845 1.278194070  
H 3.840297461 -0.382082701 1.402775764  
C -0.356159270 -5.269758701 0.302837729  
H -1.343369246 -5.652968407 0.029620359  
H 0.416540235 -5.961896420 -0.032336663  
H -0.326531440 -5.179694653 1.393261552

=====  
8A  
=====

O -0.985500395 -3.235409260 -1.135435700  
N 0.804678977 -2.205016136 -1.793789029  
N 2.625337124 -2.106225491 -3.257696867  
C 0.157485008 -3.356043577 -1.708177209  
C 4.187480927 -0.911140740 -1.266833425  
C 4.707087517 -1.134437561 -2.541028023  
C 2.866170168 -1.273991227 -0.979252040  
C 3.894991636 -1.744239688 -3.496093988  
C 2.139138460 -1.875339746 -2.038396358  
H 5.723374844 -0.847018838 -2.788699627  
H 4.268280983 -1.947106719 -4.496901989  
H 4.806841373 -0.456883341 -0.500163674  
C -2.325446844 0.465288997 -0.728331923  
C -2.375116348 -0.133636102 -2.046838522  
C -1.086640239 1.176997662 -0.599530518  
C -1.137686253 0.129856944 -2.700121880  
C -0.307358772 0.909684956 -1.779367328  
C -3.429143429 0.437741548 0.283521056  
C -3.524606943 -0.924552083 -2.584260225  
C -0.711103082 2.109384775 0.503444850  
C -0.723709583 -0.278812557 -4.077870369  
C 1.023378372 1.504842401 -2.118403912  
H -4.085333347 1.308588862 0.156647339  
H -4.045154095 -0.457693785 0.175676301  
H -3.035431862 0.459673703 1.302610636  
H -3.247566938 -1.486923099 -3.476704597  
H -4.352870941 -0.255087972 -2.847140551  
H -3.898283958 -1.634389639 -1.840872169  
H -1.047685146 3.122164488 0.248960510

H -1.175552249 1.828753114 1.449501753  
H 0.370836943 2.146755934 0.645998597  
H 0.293927401 -0.680465817 -4.083112717  
H -0.747402608 0.589265168 -4.747899055  
H -1.386227489 -1.041566849 -4.489657879  
H 1.576498032 0.870528102 -2.813562632  
H 1.636260152 1.644793034 -1.226082087  
H 0.882980943 2.483281851 -2.594677925  
Rh -0.565444708 -1.042326570 -0.837081552  
C 0.136784852 -1.129402995 1.786452413  
C 0.191443041 -0.092487782 2.747982502  
C -0.777589202 -2.196883440 1.990031838  
H 0.902361214 0.714932978 2.610394239  
H -0.805751920 -3.014621973 1.276062250  
C -0.636094689 -0.121648885 3.861996651  
C -1.619155169 -2.204048395 3.101132393  
H -0.572438002 0.668554306 4.604369640  
H -2.313035011 -3.026703358 3.244086742  
C -1.554640889 -1.169272304 4.035076141  
H -2.204270601 -1.178654194 4.905107498  
C 2.272365093 -1.167620420 0.371580124  
C 0.943665445 -1.108542800 0.576526582  
C 3.232438326 -1.208348274 1.547470093  
H 2.703033447 -1.318997383 2.494063854  
H 3.939768076 -2.037225485 1.440620184  
H 3.822345018 -0.284699827 1.600208879  
C 0.686315715 -4.672146797 -2.181935787  
H 1.156874776 -5.193740368 -1.340480804  
H -0.143319488 -5.286164284 -2.538888216  
H 1.425590873 -4.530854225 -2.971980333

=====

8A-TS

=====

O -1.324314713 -2.828423262 -1.035261393  
N 0.694903433 -2.051668882 -1.301190853  
N 2.554723740 -2.371243477 -2.743426323  
C -0.140092075 -3.119483471 -1.342540622  
C 3.911651373 -0.400738180 -1.219799638  
C 4.503977776 -0.987483025 -2.331714392  
C 2.617162943 -0.813768625 -0.854293108  
C 3.800096273 -1.968188405 -3.047152042  
C 1.996988654 -1.801755786 -1.679767847  
H 5.501041412 -0.701277316 -2.648670435  
H 4.254932404 -2.447647333 -3.910371065  
H 4.437968254 0.351974815 -0.640712559  
C -2.555700541 0.801865816 -1.204250574  
C -2.374291420 0.277332246 -2.560889006  
C -1.400787234 1.571591973 -0.855022848  
C -1.087785244 0.652734220 -3.003964424  
C -0.438838184 1.394615889 -1.918908238  
C -3.812091827 0.655906558 -0.402696252  
C -3.396356106 -0.532624483 -3.295124292  
C -1.208655477 2.386034966 0.386803687  
C -0.430920780 0.331639051 -4.309454918  
C 0.905465364 2.044253826 -2.025197744  
H -4.567500114 1.373744965 -0.745628655  
H -4.236606598 -0.345749050 -0.511887372

H -3.636186838 0.839322388 0.659509957  
H -2.969787598 -1.024019718 -4.171332836  
H -4.220702171 0.107293367 -3.632300854  
H -3.821034908 -1.306958795 -2.649865627  
H -1.554115534 3.413876772 0.221075833  
H -1.773147106 1.975906014 1.227195501  
H -0.156679466 2.430745125 0.677791774  
H 0.590991676 -0.029587768 -4.158167362  
H -0.373433053 1.229800105 -4.936348915  
H -0.979543269 -0.431957752 -4.863243580  
H 1.629142165 1.384207487 -2.510240555  
H 1.299479961 2.313224077 -1.043220878  
H 0.835324109 2.961370707 -2.622709274  
Rh -0.830488920 -0.558943272 -1.082059860  
C 0.079028487 -1.646161318 1.621981740  
C -1.294196010 -1.710924864 1.946604729  
C 1.002022743 -2.321535826 2.456747293  
H -2.011210918 -1.209296346 1.305365205  
H 2.057397366 -2.306578159 2.202572584  
C -1.723914742 -2.400912762 3.074020863  
C 0.568869531 -3.013496637 3.579103470  
H -2.781201601 -2.438059330 3.316701174  
H 1.286681294 -3.529241562 4.209413052  
C -0.795234859 -3.052733183 3.890423059  
H -1.133407474 -3.597322464 4.766983509  
C 1.869208694 -0.445544302 0.309388667  
C 0.548321784 -0.950486481 0.434385210  
C 2.469596863 0.421859294 1.384016395  
H 1.810549259 0.509318590 2.248926401  
H 3.435194016 0.024500631 1.719419837  
H 2.659768105 1.430936933 0.995204628  
C 0.328344554 -4.502104282 -1.666583061  
H 0.936471105 -4.877412319 -0.835058331  
H -0.532016158 -5.156119347 -1.808959126  
H 0.962216616 -4.483664989 -2.556646585

=====

9A

=====

O -1.055129766 -3.271238327 -1.453534245  
N 1.147253156 -2.658014059 -1.298362970  
N 2.724516153 -3.283358812 -3.042357445  
C 0.092854626 -3.636354208 -1.534804463  
C 4.383859158 -1.228082299 -1.961748719  
C 4.780229092 -1.993519425 -3.057378292  
C 3.135166168 -1.515776992 -1.398823023  
C 3.931911469 -2.992308855 -3.559852600  
C 2.385937452 -2.566578388 -1.987050056  
H 5.742030621 -1.826200724 -3.529937267  
H 4.234630108 -3.587602615 -4.416518688  
H 5.016454220 -0.444893956 -1.556034446  
C -1.399081826 0.565726876 -2.089355469  
C -0.656363368 0.551990449 -3.335289001  
C -0.662707448 1.351457953 -1.161260724  
C 0.454970479 1.455981374 -3.232304335  
C 0.517319679 1.876613975 -1.862080693  
C -2.688828230 -0.158888295 -1.860242724  
C -1.097372174 -0.182680890 -4.563044071

C -1.051853418 1.687241793 0.244162887  
C 1.394729614 1.842561722 -4.331470966  
C 1.492622733 2.848687172 -1.275123596  
H -3.447638273 0.175874382 -2.576841593  
H -2.562895298 -1.238096356 -1.989728928  
H -3.076112509 0.026532762 -0.856854200  
H -0.266597688 -0.365310252 -5.247923851  
H -1.852406740 0.403794855 -5.102114201  
H -1.550496459 -1.143319130 -4.303537846  
H -1.679955721 2.587063074 0.252799571  
H -1.610583425 0.877643585 0.716092885  
H -0.175993010 1.894044638 0.863913715  
H 2.388539076 2.084785938 -3.946883678  
H 1.019896984 2.727847338 -4.860967159  
H 1.503427267 1.042427540 -5.067852497  
H 2.450761318 2.823909521 -1.799369454  
H 1.674575090 2.643735647 -0.217725500  
H 1.097625017 3.869746685 -1.348022223  
Rh 0.716856718 -0.300856739 -1.778403401  
C 0.362679720 -1.910864830 1.038157225  
C 1.068911791 -2.182880402 2.221817255  
C -1.035774827 -1.817057252 1.085207343  
H 2.150602341 -2.272555351 2.194312572  
H -1.585554004 -1.623208523 0.176084086  
C 0.391272008 -2.349676371 3.427943230  
C -1.710244775 -1.985921621 2.292414665  
H 0.949835718 -2.561333418 4.334634781  
H -2.793437719 -1.913055062 2.316102266  
C -1.000221491 -2.248150349 3.466271162  
H -1.529197216 -2.375929832 4.405914783  
C 2.357990503 -0.959969461 -0.309096694  
C 1.156706214 -1.720041752 -0.199035421  
C 2.884195805 0.022066880 0.695335746  
H 3.641916752 -0.440872580 1.338076234  
H 3.355222225 0.870170772 0.189889714  
H 2.082446814 0.396042645 1.334842443  
C 0.545661330 -5.035808086 -1.821699142  
H -0.333887041 -5.669050217 -1.933482170  
H 1.160861135 -5.054093361 -2.725255251  
H 1.171728253 -5.395993233 -0.997463644

=====

1B

=====

O -0.452052176 -2.613296032 -0.073010214  
N 1.066660166 -2.582836390 -1.848863602  
N 2.068800211 -1.284240842 -0.064398021  
C -0.085253388 -2.922731161 -1.239675283  
C 4.579995632 -1.734937310 -1.160545111  
C 4.448979855 -0.960997462 -0.004175353  
C 3.445044279 -2.275935173 -1.740450501  
C 3.181060791 -0.776948869 0.519063950  
C 2.167741060 -2.036337137 -1.187083125  
H 5.307257652 -0.529198587 0.497773945  
H 3.013619184 -0.248456284 1.451560855  
H 5.557590008 -1.932953358 -1.590423942  
C -0.774786234 0.771046221 2.055721998  
C -1.734778762 0.151711851 1.190202713

C 0.267833769 1.346044540 1.241508722  
C -1.323653936 0.411638021 -0.184941903  
C -0.100819990 1.144963861 -0.153266132  
C -0.810970128 0.789102316 3.549459219  
C -2.979993343 -0.576965034 1.589148164  
C 1.428253293 2.146034718 1.745221853  
C -2.078244925 -0.043483101 -1.394679904  
C 0.686617374 1.628447175 -1.331871390  
H -1.308319807 1.705699205 3.889949799  
H -1.364508748 -0.064588733 3.944887877  
H 0.199028224 0.762295127 3.959227562  
H -3.119436741 -1.471921206 0.976613939  
H -3.860090971 0.064887635 1.461363912  
H -2.937950850 -0.892404318 2.632920980  
H 1.108489156 3.167098045 1.986568451  
H 1.845545650 1.682066917 2.639970779  
H 2.219283819 2.214809179 0.994360745  
H -1.441360235 -0.065872125 -2.281932354  
H -2.917137861 0.633249700 -1.595428824  
H -2.486637831 -1.045147896 -1.240041256  
H 0.457195789 1.050473690 -2.229859829  
H 1.760509133 1.550806642 -1.144466758  
H 0.457212031 2.680361271 -1.535883307  
Rh 0.207483053 -0.801847339 0.827507257  
H 3.521377325 -2.926292181 -2.605838537  
C 1.545507073 -1.623634577 3.312917948  
O 2.121510983 -0.525112987 3.380821466  
O 0.744462371 -2.050131321 2.398128271  
O 1.729397774 -2.551650047 4.287313461  
H 2.344177246 -2.148297310 4.918169498  
C -1.060557246 -3.756985903 -2.046545029  
H -0.563751757 -4.598381042 -2.537814140  
H -1.845274925 -4.129582405 -1.387398362  
H -1.522881746 -3.135365486 -2.823484659  
Ag 1.262497663 -2.744548798 -4.035061836  
O 0.265123129 -3.580514193 -5.986076832  
N 1.774080515 -3.053067446 -7.655537128  
N 2.722887516 -1.942245364 -5.759633064  
C 0.644653022 -3.662475586 -7.152289391  
C 4.645750523 -0.786961615 -7.434304714  
C 4.651703835 -0.518372715 -6.061888695  
C 3.675462484 -1.630127788 -7.949505329  
C 3.678176880 -1.113666773 -5.277276039  
C 2.725597858 -2.193774223 -7.077580929  
H 5.393122196 0.133542970 -5.613956928  
H 3.652593374 -0.941882253 -4.205458164  
H 5.385769844 -0.342692614 -8.092424393  
H 3.641876698 -1.853693604 -9.011632919  
H 1.931709409 -3.217543125 -8.640346527  
C -0.147512913 -4.442887783 -8.180780411  
H -0.788405180 -3.754824877 -8.744023323  
H 0.494128734 -4.972822189 -8.891345024  
H -0.783313513 -5.158917904 -7.660652161

=====

3B

=====

O 0.857206643 -0.132901117 -0.829178751

N 1.772552133 -2.077911615 -1.707817912  
 N 3.270194054 -3.264474154 -0.388254553  
 C 1.056212187 -0.954231024 -1.784992933  
 C 1.393134236 -3.525101662 1.683486700  
 C 2.648035765 -4.112166882 1.795862317  
 C 1.073189974 -2.787793159 0.529890478  
 C 3.533886433 -3.959190130 0.720211864  
 C 2.055618525 -2.677040577 -0.495780915  
 H 2.928672314 -4.709622860 2.656541824  
 H 4.512972355 -4.435849190 0.752710879  
 H 0.639590919 -3.651502848 2.455336094  
 C 1.223578572 0.634632289 3.140156507  
 C 1.407812357 1.508157492 1.995221615  
 C 2.273709059 -0.331432819 3.127756596  
 C 2.637647629 1.115845680 1.330657244  
 C 3.157565832 -0.034266844 2.000835896  
 C 0.071597181 0.721359551 4.087469578  
 C 0.527310371 2.660111666 1.632684946  
 C 2.508148909 -1.394135714 4.154597282  
 C 3.193829060 1.781344295 0.112823680  
 C 4.440946102 -0.739148855 1.693039298  
 H 0.009257256 1.726662874 4.516629219  
 H -0.860149622 0.517995000 3.547934532  
 H 0.163396746 0.002894914 4.903014183  
 H 0.609673083 2.898666382 0.570301712  
 H 0.805478692 3.552066326 2.207589865  
 H -0.517017901 2.423727274 1.849282622  
 H 3.147258759 -0.999846160 4.953586578  
 H 1.571934700 -1.730158687 4.604938030  
 H 3.008445740 -2.262318611 3.723525524  
 H 4.028418541 1.217619300 -0.307095736  
 H 3.547795773 2.787671089 0.362948030  
 H 2.420475245 1.869560480 -0.655677974  
 H 4.647209644 -0.747980416 0.620760858  
 H 4.413853645 -1.775624275 2.032788038  
 H 5.274789333 -0.239724189 2.201440334  
 Rh 1.123742700 -0.470427006 1.221390605  
 H 0.038408708 -2.554295063 0.268800825  
 C -1.778795958 -0.984946012 0.489253759  
 O -0.962718129 -0.565685868 1.426951528  
 O -1.516149044 -1.689383507 -0.478384644  
 O -3.059602022 -0.577681601 0.682607591  
 H -3.075912952 -0.037028212 1.485213280  
 C 0.438965291 -0.570759833 -3.100550413  
 H 0.588001192 0.494158447 -3.293405771  
 H 0.817103922 -1.165155292 -3.933550835  
 H -0.637068987 -0.747207046 -2.990140676  
 Ag 2.937183142 -3.077886820 -3.309020281  
 O 2.888377428 -3.693462849 -5.594515800  
 N 4.764915943 -5.027409554 -5.835119247  
 N 5.034512520 -4.205006123 -3.608990908  
 C 3.572901487 -4.473886013 -6.251993656  
 C 7.584557056 -5.338693619 -3.513373137  
 C 7.076895714 -4.651849747 -2.407696009  
 C 6.806202888 -5.452199936 -4.654622078  
 C 5.804363728 -4.107853413 -2.503317595  
 C 5.527136803 -4.867300034 -4.664707661  
 H 7.653760910 -4.541704178 -1.496318460

H 5.345409393 -3.579549551 -1.672627211  
 H 8.575348854 -5.782131195 -3.487632990  
 H 7.175814152 -5.980939865 -5.528007507  
 H 5.207966805 -5.621422291 -6.522670269  
 C 3.162696838 -4.884585381 -7.652570724  
 H 3.341610432 -5.947407246 -7.844019890  
 H 2.103465080 -4.665056705 -7.781423092  
 H 3.732274771 -4.303342342 -8.386743546

=====

3B-TS

=====

O 0.714601219 0.465346962 -0.819761574  
 N 1.201623201 -1.287556648 -2.290388584  
 N 1.784093380 -3.458637476 -1.935693741  
 C 0.833602250 -0.040643457 -1.980943441  
 C 0.812059283 -3.506414175 0.673948467  
 C 1.307194352 -4.670895576 0.096521623  
 C 0.778128088 -2.293100357 -0.044363834  
 C 1.792113185 -4.580165386 -1.212480545  
 C 1.256571531 -2.336235523 -1.384959579  
 H 1.315590143 -5.619214535 0.623673797  
 H 2.206715345 -5.456901550 -1.707768917  
 H 0.423152864 -3.522441626 1.689771891  
 C 2.892563820 -1.037558913 2.491576910  
 C 2.597398520 0.373176724 2.659047365  
 C 3.545796156 -1.198349118 1.209317327  
 C 2.987482071 1.061521411 1.467808127  
 C 3.562890291 0.078374296 0.558813632  
 C 2.709013462 -2.094086647 3.538508177  
 C 1.911165595 0.948752284 3.857600927  
 C 4.144333839 -2.456158876 0.665924430  
 C 2.818181515 2.511382580 1.136625290  
 C 4.124910831 0.389525175 -0.794139624  
 H 3.571979284 -2.122997046 4.215362549  
 H 1.818830848 -1.895552516 4.141618729  
 H 2.601023674 -3.083930254 3.089099646  
 H 1.725879312 2.017753839 3.743119001  
 H 2.523469687 0.796905398 4.753201962  
 H 0.947489262 0.454316556 4.015130997  
 H 5.177160263 -2.550024509 1.025960684  
 H 3.590785503 -3.338706017 0.992666125  
 H 4.164951324 -2.444546700 -0.426199615  
 H 2.305269718 2.619721174 0.174948722  
 H 3.791601658 3.009431601 1.059331536  
 H 2.226111650 3.031944990 1.891603231  
 H 3.491883278 1.113554955 -1.314552903  
 H 4.218585014 -0.501878500 -1.417684555  
 H 5.120999813 0.836604893 -0.689564586  
 Rh 1.476554990 -0.466325581 0.930593669  
 H -0.431688547 -1.666851163 0.124417946  
 C -1.482467532 -0.422510505 1.292761207  
 O -0.403637171 -0.064809069 1.863948226  
 O -1.577997327 -1.216208816 0.310738087  
 O -2.635673523 0.055470645 1.768804312  
 H -2.424718142 0.661445975 2.495577574  
 C 0.579934299 0.895507395 -3.140908957  
 H 1.529653430 1.346464992 -3.453813553

H 0.156487271 0.358725786 -3.992374420  
H -0.091785938 1.696052670 -2.827679873  
Ag 2.338947296 -2.030164480 -4.041557789  
O 4.790680408 -2.408331156 -3.047438860  
N 4.797074318 -4.298919678 -4.362482548  
N 3.540429831 -2.822010279 -5.760960102  
C 5.000647068 -3.607148886 -3.177610159  
C 4.663388252 -4.015517712 -8.024419785  
C 3.749138594 -2.968928099 -8.159925461  
C 5.022439003 -4.434740543 -6.751685619  
C 3.220470905 -2.407384396 -7.007546425  
C 4.444350719 -3.811621189 -5.635783195  
H 3.445370436 -2.601412296 -9.133475304  
H 2.498468876 -1.600183845 -7.065551758  
H 5.099086761 -4.490935326 -8.897744179  
H 5.750847816 -5.227142334 -6.610581875  
H 5.136883736 -5.250472546 -4.370292187  
C 5.471579552 -4.475328445 -2.026442289  
H 5.942237854 -5.412716866 -2.337357283  
H 6.176731586 -3.898744583 -1.424781799  
H 4.605835438 -4.711403847 -1.398694992

=====

4B

=====

O 0.410753131 -3.117128134 1.131288052  
N 2.604102850 -3.689918995 0.534157515  
N 4.543972492 -2.584763050 0.967059016  
C 1.340373993 -3.942344666 0.697273314  
C 3.320778370 -0.185811594 1.585057378  
C 4.704463482 -0.329598218 1.734073639  
C 2.539191961 -1.251221418 1.135524988  
C 5.280725479 -1.542965770 1.377449870  
C 3.192541599 -2.476597071 0.900871217  
H 5.325511456 0.488896012 2.083077431  
H 6.354731560 -1.696970463 1.407165289  
H 2.851967573 0.770062864 1.806500196  
C 0.170277670 0.842901826 -0.403152287  
C -1.128478885 0.145520389 -0.391011834  
C 1.079237700 0.079071246 -1.202952743  
C -0.977321923 -1.067020893 -1.073235273  
C 0.426275939 -1.168751717 -1.508240581  
C 0.398889631 2.211767912 0.159277692  
C -2.340696096 0.670335889 0.314564109  
C 2.456610441 0.475737572 -1.633928418  
C -1.978069186 -2.166443110 -1.248999953  
C 0.982878864 -2.281900406 -2.344661713  
H 0.000464775 2.979621410 -0.515419602  
H -0.101249024 2.325488091 1.124847412  
H 1.463245273 2.412149191 0.302187145  
H -3.158259630 -0.052925117 0.311454117  
H -2.697383165 1.590617537 -0.162421331  
H -2.105619907 0.909223735 1.357007861  
H 2.406384468 1.002170324 -2.594589233  
H 2.931242943 1.139728308 -0.908876240  
H 3.100333214 -0.397960812 -1.758129358  
H -1.631453753 -3.077148676 -0.746934652  
H -2.120285988 -2.398530722 -2.310262918

H -2.948391199 -1.900034666 -0.827190816  
H 0.436256737 -3.209165335 -2.158064365  
H 2.038104773 -2.471448183 -2.133326769  
H 0.884992301 -2.044373512 -3.411625385  
Rh 0.594986677 -1.049901247 0.629853725  
H 0.221029282 -2.875002623 2.663206577  
C 0.058758233 -1.278939605 3.680581570  
O 0.146277070 -0.485469580 2.723858833  
O 0.108783327 -2.575613976 3.622323751  
O -0.109507240 -0.841167152 4.923139572  
H -0.126062870 0.127707392 4.895143032  
C 0.833691716 -5.324421883 0.368671566  
H 1.639231443 -5.963729382 0.004364096  
H 0.387513906 -5.775096893 1.261556983  
H 0.036055479 -5.254114151 -0.379748553  
Ag 4.941895008 -4.564872742 -0.055022817  
O 4.035437584 -4.571817398 -2.498714209  
N 3.822726965 -6.854760647 -2.293313265  
N 5.769373417 -6.467189789 -0.971391261  
C 3.391658545 -5.592442989 -2.687319517  
C 6.860342026 -8.882528305 -1.859317899  
C 7.569882870 -8.072483063 -0.970068216  
C 5.617881775 -8.459344864 -2.308493376  
C 6.989515305 -6.880787849 -0.562594831  
C 5.100475788 -7.240862846 -1.845031261  
H 8.548915863 -8.355110168 -0.600428045  
H 7.504111290 -6.221906662 0.128453687  
H 7.275263786 -9.822887421 -2.208355904  
H 5.052826405 -9.049383163 -3.023308754  
H 3.253727913 -7.624070168 -2.620048046  
C 2.026797056 -5.595928192 -3.350137472  
H 1.942773700 -6.373035431 -4.116825581  
H 1.251326799 -5.774721146 -2.597225189  
H 1.861327767 -4.620727539 -3.805175066

=====

5B

=====

O 0.649319470 -0.490451187 -1.390759945  
N 2.744399071 -1.506615281 -1.470389366  
N 4.248507500 -2.022285461 0.140923306  
C 1.622535348 -1.069463611 -2.005525112  
C 2.787332058 -0.933514953 2.221678972  
C 3.996517897 -1.565583944 2.479072809  
C 2.264305115 -0.836055219 0.915401518  
C 4.701180935 -2.085488558 1.388157964  
C 3.047634602 -1.429795265 -0.112795651  
H 4.391390324 -1.653731108 3.486142397  
H 5.664803028 -2.574261427 1.521715403  
H 2.226984262 -0.519664466 3.052825689  
C -0.738591671 0.487945944 2.336900711  
C -1.647889733 0.556471586 1.175034404  
C 0.240423039 1.504292607 2.190712690  
C -1.208263993 1.582795858 0.321153671  
C 0.022110008 2.115133047 0.886543453  
C -0.952657700 -0.403790861 3.519273996  
C -2.823073864 -0.349327862 0.986170948  
C 1.252525210 1.966763258 3.192890167



C -1.762740016 1.976366282 -1.014923573  
C 0.812155426 3.245386124 0.312101007  
H -1.735333920 0.010173554 4.167372227  
H -1.272570372 -1.402255535 3.210874557  
H -0.044325534 -0.510357261 4.115464211  
H -3.206389904 -0.309056729 -0.034584954  
H -3.633851290 -0.066795476 1.669319153  
H -2.557627439 -1.387442708 1.207407713  
H 0.958557427 2.946273804 3.588295937  
H 1.325085282 1.282170773 4.039501667  
H 2.245730400 2.067835331 2.748386383  
H -1.079453111 1.677615047 -1.817867994  
H -1.903029323 3.060455084 -1.073763132  
H -2.727091789 1.501691222 -1.203704238  
H 0.785561323 3.229218960 -0.779899120  
H 1.853923440 3.209783792 0.637356281  
H 0.385955125 4.201509476 0.644665301  
Rh 0.497856677 0.047206718 0.548226178  
C 1.403303862 -1.250330210 -3.487917185  
H 2.271677732 -1.689265609 -3.980228901  
H 0.533175707 -1.895758748 -3.646353722  
H 1.175656676 -0.281640619 -3.942881823  
Ag 4.485869884 -2.702180862 -2.356071472  
O 5.006811619 -4.284310818 -4.066752434  
N 7.039455891 -5.158841610 -3.392832994  
N 6.854980469 -3.222377300 -2.018981457  
C 5.853319168 -5.173676491 -4.095146656  
C 9.529398918 -3.500586033 -1.266882777  
C 8.754226685 -2.460664272 -0.744243681  
C 8.952129364 -4.389232635 -2.161655188  
C 7.429831505 -2.366433859 -1.149018884  
C 7.602383137 -4.215018749 -2.513536930  
H 9.165131569 -1.744811654 -0.041166484  
H 6.774353981 -1.593361259 -0.759440660  
H 10.570527077 -3.615338802 -0.981503785  
H 9.529193878 -5.205726147 -2.585518122  
H 7.638532162 -5.954006195 -3.568762779  
C 5.670975685 -6.410089970 -4.956364632  
H 6.414133072 -6.429528236 -5.761342049  
H 5.785007477 -7.325748920 -4.365880489  
H 4.673836708 -6.385132313 -5.393896580

=====  
6B  
=====

O -0.198565364 -1.500956416 -0.407490224  
N 1.534671903 -2.804777145 -1.262032390  
N 3.793459892 -2.647547722 -1.128346324  
C 0.271258563 -2.487068176 -1.081436157  
C 3.814595938 -0.412815481 0.478601038  
C 5.020288944 -0.998492479 0.087049514  
C 2.580435038 -0.930887222 0.072304547  
C 4.952386856 -2.122667074 -0.727989137  
C 2.622571230 -2.085783243 -0.742288768  
H 5.976803780 -0.596221805 0.405484855  
H 5.852699280 -2.626428366 -1.072892427  
H 3.840616465 0.460942298 1.122587919  
C 1.065332174 2.184487581 1.142077923

C -0.382597059 1.947020531 1.111467123  
C 1.566147804 2.033295155 -0.190434799  
C -0.728250623 1.535490751 -0.188189417  
C 0.496185124 1.508520126 -0.992270112  
C 1.810014606 2.727744579 2.323862314  
C -1.299738169 2.155085087 2.274600744  
C 2.924469471 2.400979996 -0.701490581  
C -2.067843914 1.113388300 -0.703256130  
C 0.548641205 1.179883718 -2.452477932  
H 1.640948653 3.806852579 2.427174568  
H 1.477614999 2.250277281 3.249490738  
H 2.886759996 2.567508698 2.228638649  
H -2.246209383 1.628142118 2.145313978  
H -1.513345599 3.223987341 2.396705866  
H -0.848685741 1.798263311 3.203403473  
H 2.853200436 3.339109182 -1.265244603  
H 3.641958714 2.556238890 0.105931483  
H 3.326904058 1.636619091 -1.369627833  
H -1.998246551 0.109587602 -1.135629773  
H -2.413783789 1.796804070 -1.487245560  
H -2.817673683 1.087768197 0.088806093  
H -0.105221048 0.333813161 -2.678654909  
H 1.562018871 0.917032957 -2.763834476  
H 0.216217667 2.033210516 -3.056164265  
Rh 0.837625325 0.019663999 0.578499079  
C -1.387945175 -1.122969508 2.761653900  
C -1.838442922 -0.831752241 4.064285278  
C -2.320211887 -1.488055348 1.775142312  
H -1.117993116 -0.546706319 4.824915886  
H -1.965617895 -1.703548074 0.775653601  
C -3.195161343 -0.902171135 4.368873119  
C -3.675482988 -1.549811840 2.090057135  
H -3.532582998 -0.673648775 5.375414848  
H -4.390634537 -1.828539968 1.321139097  
C -4.118521690 -1.256921291 3.382299423  
H -5.177108765 -1.304936051 3.619991541  
C 1.251023293 -0.988823175 2.670408487  
C 0.024585046 -1.021294594 2.501476288  
C 2.566620350 -1.213848233 3.279822826  
H 2.429852724 -1.609603405 4.291608810  
H 3.154735565 -1.927411199 2.697607994  
H 3.141778708 -0.285143584 3.345461607  
C -0.795055509 -3.362323523 -1.703998327  
H -1.553318143 -2.727347136 -2.170746326  
H -0.395751178 -4.058085442 -2.442155600  
H -1.292720914 -3.928837061 -0.907931924  
Ag 2.453839540 -4.498725891 -2.411494970  
O 0.645937502 -5.756357193 -3.809880972  
N 1.706646204 -7.763562679 -3.452021599  
N 3.528527260 -6.229672432 -3.472616434  
C 0.588066220 -6.948717117 -3.539112806  
C 5.168102741 -8.179507256 -4.617958069  
C 5.673976421 -6.907919407 -4.339917183  
C 3.837794304 -8.452377319 -4.334850788  
C 4.820031166 -5.972776890 -3.773346663  
C 3.042238712 -7.448509216 -3.762918234  
H 6.704323292 -6.646970272 -4.553550243  
H 5.169796944 -4.974225521 -3.531436682

H 5.798480988 -8.944555283 -5.060482979  
H 3.406739473 -9.422728539 -4.560891151  
H 1.521559238 -8.752709389 -3.359213829  
C -0.720928192 -7.644610882 -3.221497774  
H -0.734434545 -8.698950768 -3.513249874  
H -0.902869582 -7.585949898 -2.142219067  
H -1.524821997 -7.114608288 -3.733017445

=====  
6B-TS  
=====

O -0.273803353 -1.028334856 -1.188053131  
N 1.553624392 -2.310023546 -1.882073402  
N 3.760716200 -1.779240370 -1.875489950  
C 0.264388651 -2.001660347 -1.814434171  
C 3.655699492 -0.226435885 0.408741146  
C 4.869988441 -0.409188092 -0.247962698  
C 2.469402075 -0.789463401 -0.089075513  
C 4.865310192 -1.203110695 -1.393694282  
C 2.572149038 -1.587888122 -1.260676146  
H 5.790778637 0.026738176 0.125953287  
H 5.781723976 -1.401322246 -1.946461558  
H 3.618384600 0.339015186 1.335434079  
C 0.943826556 2.120886087 1.380048633  
C -0.466642976 1.795553327 1.464503765  
C 1.263913155 2.411053896 -0.009261081  
C -0.965742946 1.729292274 0.135955155  
C 0.117870994 2.122017860 -0.778912425  
C 1.837650180 2.388779402 2.553816795  
C -1.238124132 1.559508562 2.726405144  
C 2.583558798 2.916380405 -0.504283726  
C -2.352725029 1.387282491 -0.311891794  
C -0.042637445 2.189782381 -2.265713453  
H 1.653721094 3.394378662 2.952840567  
H 1.660902739 1.674755335 3.362174034  
H 2.893102169 2.338272333 2.276101351  
H -2.078192472 0.882075369 2.561679602  
H -1.632589459 2.507446289 3.111514330  
H -0.608274281 1.118824482 3.502635241  
H 2.685140133 3.987426758 -0.291834712  
H 3.419882774 2.403512716 -0.022493180  
H 2.688762903 2.776894808 -1.582245708  
H -2.315491676 0.683175862 -1.148802757  
H -2.887687445 2.284831762 -0.645033777  
H -2.926604271 0.923437059 0.492009312  
H -0.482016653 1.259202838 -2.638964891  
H 0.913127303 2.342302561 -2.771052599  
H -0.711764634 3.011725187 -2.546547651  
Rh 0.630668044 0.194207236 0.304699719  
C -0.984246492 -1.802820563 2.142638445  
C -1.051369786 -2.063477039 3.521288633  
C -2.156098366 -1.868224263 1.367024779  
H -0.148689345 -2.001625299 4.122117996  
H -2.089639187 -1.653156400 0.305653632  
C -2.272066355 -2.387857676 4.111491203  
C -3.368993521 -2.202608347 1.963300943  
H -2.318386316 -2.583497524 5.178725243  
H -4.268936634 -2.260476828 1.357508540

C -3.431415796 -2.459151030 3.336228132  
H -4.380136013 -2.712728739 3.799744368  
C 1.510459065 -1.750271082 1.392602205  
C 0.273144037 -1.448620439 1.514517665  
C 2.579775095 -2.636667967 1.918023229  
H 2.119383335 -3.337962627 2.623200417  
H 3.068855047 -3.199084759 1.117077351  
H 3.350423336 -2.067893028 2.447679758  
C -0.704317212 -2.860996723 -2.596310616  
H -0.221588224 -3.734715700 -3.036621094  
H -1.508823276 -3.187206030 -1.930650592  
H -1.160108685 -2.259981632 -3.390316963  
Ag 2.670158863 -3.605998993 -3.382407904  
N 4.717419624 -3.263586760 -4.806235790  
O 3.048652172 -5.643108368 -4.468032837  
N 5.202991009 -5.538772583 -5.308874607  
C 4.051569939 -6.187330246 -4.929854870  
C 7.180743217 -2.502977848 -5.888467789  
C 6.309832573 -1.540966868 -5.368903637  
C 6.802977562 -3.836994648 -5.863217831  
C 5.100792885 -1.971920848 -4.839674950  
C 5.552874565 -4.174403191 -5.314327240  
H 6.563151360 -0.486552358 -5.371140480  
H 4.401419163 -1.271532893 -4.395342350  
H 8.140813828 -2.216936111 -6.307022572  
H 7.458392620 -4.607548237 -6.258920193  
H 5.922754288 -6.141781807 -5.681168079  
C 4.088439941 -7.692804337 -5.100977421  
H 4.941055775 -8.057671547 -5.679522038  
H 4.112685204 -8.152479172 -4.107889175  
H 3.162083149 -8.007286072 -5.586216927

=====  
7B  
=====

O -0.489724159 -0.764891386 -1.353996634  
N 1.495801687 -1.798041344 -1.972071648  
N 3.267136097 -0.285814971 -1.873443723  
C 0.170787096 -1.676907301 -1.953161597  
C 3.202876329 -0.172836348 0.911422610  
C 4.145703793 0.562670171 0.207017004  
C 2.268991947 -0.982713342 0.231563911  
C 4.140426159 0.453138024 -1.187988520  
C 2.325603962 -0.978541851 -1.195603013  
H 4.881713867 1.179315686 0.712125242  
H 4.884421825 0.981778085 -1.781670332  
H 3.174188614 -0.157050207 1.997082472  
C 0.565138459 2.332682133 1.341950178  
C -0.726403534 1.815398812 1.671200871  
C 0.552477837 2.764526844 -0.068454914  
C -1.469544888 1.743651867 0.433598459  
C -0.683313549 2.412345886 -0.618400693  
C 1.675054908 2.639789343 2.300127506  
C -1.234965801 1.430947185 3.024952412  
C 1.715666771 3.412708998 -0.752739131  
C -2.886187077 1.295067430 0.267654151  
C -1.157569408 2.555188179 -2.031491756  
H 1.584085941 3.670010090 2.667079926

H 1.654860020 1.972534776 3.164613008  
H 2.650191307 2.545853376 1.816279888  
H -1.903027654 0.569007933 2.971192837  
H -1.790673494 2.267906189 3.465471506  
H -0.417621464 1.174142599 3.702237129  
H 1.914688468 4.402347565 -0.324075222  
H 2.625529289 2.815148830 -0.631541431  
H 1.535999775 3.536656380 -1.822400212  
H -3.031401634 0.830117285 -0.710821867  
H -3.566254377 2.153614283 0.338952154  
H -3.165354729 0.570216894 1.033572316  
H -1.424499631 1.574214697 -2.439292669  
H -0.392274112 2.992725372 -2.675557375  
H -2.049375534 3.190857649 -2.079708815  
Rh 0.230253935 0.454000145 0.222172946  
C -0.991266608 -1.833310246 1.964018106  
C -0.936021984 -2.161449432 3.329280615  
C -2.208617687 -1.997548819 1.275674462  
H -0.001538089 -2.029705048 3.867659330  
H -2.246701241 -1.738212705 0.221724540  
C -2.067426205 -2.644268990 3.987930059  
C -3.334157705 -2.484601736 1.935837150  
H -2.011119127 -2.892677307 5.044016361  
H -4.265472889 -2.614778996 1.391146779  
C -3.268605471 -2.806526661 3.295212030  
H -4.148365498 -3.181505203 3.809912443  
C 1.352378130 -1.895657539 1.003395200  
C 0.177695468 -1.312326670 1.258882284

C 1.817143202 -3.287427425 1.344043016  
H 1.030755997 -3.836605072 1.867288470  
H 2.079077244 -3.836336374 0.430234313  
H 2.711243629 -3.270973921 1.980126739  
C -0.662654638 -2.663371801 -2.738278389  
H -0.064798482 -3.439155817 -3.220551968  
H -1.373268127 -3.133629560 -2.051302910  
H -1.244885445 -2.127314329 -3.493924856  
Ag 2.547547579 -2.656156063 -3.697752476  
N 4.338361263 -2.411286354 -5.188570976  
O 2.261810541 -4.533508301 -5.171664238  
N 4.124825001 -4.379638195 -6.534179211  
C 2.971590996 -4.978538513 -6.068788052  
C 6.628639698 -1.704307675 -6.620778561  
C 6.159852028 -0.882552743 -5.592147827  
C 5.940859795 -2.868463755 -6.922149181  
C 5.019485950 -1.275480151 -4.910149574  
C 4.789221287 -3.191924810 -6.181878567  
H 6.666621208 0.038024981 -5.326072693  
H 4.610819817 -0.680263340 -4.097879410  
H 7.519886971 -1.440922618 -7.181858540  
H 6.281591415 -3.524367332 -7.717879772  
H 4.582989216 -4.883466721 -7.280421734  
C 2.637016773 -6.296824932 -6.738308430  
H 3.062307835 -6.403319836 -7.739941597  
H 3.010871887 -7.114233971 -6.111707687  
H 1.551267385 -6.388276577 -6.793260574

## Frequencies

=====

1

=====

|         |         |         |         |         |         |
|---------|---------|---------|---------|---------|---------|
| 27.81   | 31.32   | 38.09   | 54.48   | 71.31   | 100.63  |
| 103.48  | 108.69  | 120.27  | 125.72  | 129.67  | 138.44  |
| 146.43  | 152.81  | 161.78  | 164.03  | 172.00  | 179.46  |
| 189.79  | 200.13  | 206.56  | 210.16  | 240.68  | 247.58  |
| 272.82  | 286.38  | 293.59  | 306.37  | 313.12  | 328.73  |
| 331.19  | 389.20  | 403.94  | 421.12  | 425.89  | 432.07  |
| 456.93  | 535.90  | 538.55  | 539.92  | 563.15  | 566.32  |
| 587.41  | 599.17  | 605.19  | 608.81  | 610.81  | 640.56  |
| 661.76  | 698.42  | 704.16  | 760.64  | 795.05  | 809.75  |
| 810.03  | 815.46  | 855.12  | 893.66  | 969.38  | 973.28  |
| 977.92  | 988.36  | 1006.47 | 1030.85 | 1038.23 | 1044.91 |
| 1055.32 | 1056.44 | 1058.95 | 1061.96 | 1064.44 | 1066.27 |
| 1077.56 | 1103.01 | 1105.80 | 1133.99 | 1137.83 | 1178.69 |
| 1181.35 | 1183.91 | 1233.49 | 1286.53 | 1303.77 | 1326.30 |
| 1394.75 | 1395.96 | 1399.97 | 1419.49 | 1422.42 | 1425.35 |
| 1427.77 | 1438.41 | 1442.06 | 1443.61 | 1454.96 | 1461.34 |
| 1467.34 | 1469.64 | 1481.02 | 1482.51 | 1489.85 | 1492.87 |
| 1495.17 | 1500.45 | 1504.20 | 1510.64 | 1511.90 | 1516.02 |
| 1526.86 | 1535.59 | 1539.77 | 1560.09 | 1614.97 | 1666.95 |
| 1722.32 | 3038.02 | 3039.77 | 3044.24 | 3045.76 | 3047.62 |
| 3048.82 | 3103.72 | 3112.29 | 3113.15 | 3115.64 | 3116.99 |
| 3125.57 | 3144.29 | 3146.57 | 3150.03 | 3157.50 | 3162.50 |
| 3171.95 | 3188.03 | 3215.06 | 3229.60 | 3232.57 | 3805.09 |

=====

2

=====

|         |         |         |         |         |         |
|---------|---------|---------|---------|---------|---------|
| 25.13   | 39.05   | 54.28   | 64.16   | 66.96   | 78.06   |
| 86.23   | 95.72   | 101.48  | 110.82  | 116.88  | 123.17  |
| 134.98  | 144.03  | 154.74  | 167.81  | 172.67  | 176.56  |
| 188.20  | 201.34  | 209.80  | 216.23  | 225.88  | 258.52  |
| 262.26  | 273.71  | 287.19  | 300.47  | 314.38  | 328.04  |
| 328.60  | 365.52  | 409.91  | 423.13  | 433.68  | 439.87  |
| 458.17  | 523.48  | 532.51  | 534.16  | 537.98  | 564.29  |
| 568.10  | 576.94  | 592.39  | 596.88  | 603.06  | 618.48  |
| 637.55  | 696.23  | 703.56  | 754.31  | 788.25  | 795.48  |
| 810.06  | 818.06  | 875.57  | 883.37  | 960.40  | 967.07  |
| 971.52  | 978.74  | 994.45  | 1006.15 | 1040.29 | 1049.87 |
| 1050.56 | 1051.89 | 1057.45 | 1059.57 | 1061.53 | 1065.03 |
| 1081.61 | 1101.56 | 1106.22 | 1131.77 | 1133.69 | 1178.26 |
| 1181.47 | 1196.49 | 1227.02 | 1271.30 | 1317.98 | 1331.50 |
| 1356.01 | 1395.38 | 1399.50 | 1408.01 | 1424.49 | 1428.21 |
| 1433.72 | 1443.08 | 1445.20 | 1452.62 | 1457.34 | 1464.94 |
| 1466.94 | 1479.03 | 1485.26 | 1487.84 | 1489.00 | 1491.32 |
| 1495.91 | 1497.38 | 1500.89 | 1505.68 | 1511.19 | 1516.25 |
| 1519.22 | 1531.56 | 1541.98 | 1610.61 | 1646.48 | 1664.30 |
| 1692.27 | 3040.20 | 3040.69 | 3041.77 | 3044.18 | 3047.03 |
| 3047.67 | 3112.43 | 3113.35 | 3116.27 | 3117.51 | 3120.49 |
| 3121.96 | 3139.10 | 3144.14 | 3151.60 | 3153.79 | 3168.74 |
| 3179.17 | 3180.29 | 3189.23 | 3207.74 | 3243.87 | 3799.37 |

```

=====
3
=====
  9.60 22.06 53.70 72.62 80.15 90.29
100.20 115.68 118.27 125.26 129.96 130.96
143.79 145.85 155.24 160.81 170.65 179.38
187.06 198.78 210.15 215.15 226.39 230.35
247.05 267.24 289.68 295.41 301.96 318.40
321.46 388.72 405.86 420.27 424.54 439.41
455.00 520.64 522.04 534.93 539.23 566.13
588.20 595.64 599.64 602.92 614.08 617.14
629.10 682.21 694.18 770.89 787.08 793.84
814.99 817.99 849.64 937.57 966.06 971.85
975.74 991.91 992.55 1015.36 1041.63 1043.99
1053.34 1054.27 1057.77 1065.21 1065.37 1067.69
1067.83 1100.63 1106.65 1118.38 1132.72 1177.43
1182.71 1191.75 1212.34 1285.40 1337.44 1351.41
1365.68 1396.00 1398.26 1399.54 1420.00 1422.19
1428.93 1435.72 1443.27 1445.87 1453.77 1458.24
1461.65 1466.04 1477.08 1480.57 1488.04 1490.75
1492.27 1495.18 1499.49 1505.90 1509.79 1515.57
1522.22 1523.20 1536.82 1567.56 1576.58 1635.89
1780.98 3039.05 3040.18 3045.28 3045.55 3047.39
3055.38 3094.17 3109.84 3110.77 3111.52 3119.57
3123.72 3128.33 3130.36 3142.19 3146.75 3149.39
3152.37 3168.76 3171.79 3186.49 3208.87 3807.84
=====

```

```

3-TS
=====
-1328.18 18.14 38.33 55.68 69.91 81.35
 94.22 102.59 118.08 124.08 126.93 134.62
138.79 142.06 152.44 160.38 167.24 179.90
181.99 186.29 204.38 218.91 222.29 235.93
252.78 256.52 275.94 294.83 301.30 317.54
321.05 339.87 386.32 411.12 415.80 434.05
456.96 500.15 533.36 536.28 539.26 553.38
566.26 593.41 600.88 608.94 615.17 626.03
635.18 652.39 697.05 713.03 793.31 797.10
813.29 814.73 821.15 861.73 964.29 970.12
975.90 978.75 982.82 1005.48 1045.53 1051.01
1053.03 1053.99 1057.18 1062.46 1064.02 1069.97
1081.32 1099.72 1103.42 1130.94 1137.32 1177.07
1179.71 1213.60 1246.30 1248.71 1279.76 1332.12
1384.43 1390.88 1393.44 1399.43 1407.19 1424.10
1427.36 1428.68 1437.36 1441.54 1450.13 1455.56
1467.84 1471.72 1476.11 1483.07 1485.57 1490.79
1491.94 1492.83 1495.52 1501.28 1506.16 1507.06
1514.02 1525.68 1529.44 1552.17 1557.61 1573.88
1632.84 1735.15 3037.14 3038.30 3041.06 3041.76
3043.42 3051.02 3104.29 3104.88 3108.48 3114.83
3117.28 3124.45 3132.30 3139.61 3140.69 3146.35
3147.54 3151.55 3161.03 3170.95 3198.41 3797.35
=====

```

```

4
=====
 28.22 33.91 48.62 62.10 74.21 90.78
102.33 111.66 132.60 135.91 139.43 142.63
148.51 154.92 159.11 163.85 165.60 177.16

```

```

188.90 193.53 205.53 217.18 241.96 259.29
271.90 292.81 296.41 303.49 313.54 320.60
338.91 364.69 401.63 413.09 438.60 457.41
480.36 533.63 538.24 551.22 556.83 566.70
574.88 578.47 595.06 616.54 628.34 642.03
652.92 671.37 702.51 789.99 797.75 800.67
807.18 810.52 861.63 944.30 945.84 966.57
972.04 972.54 1035.80 1039.20 1047.04 1050.67
1054.67 1056.55 1057.51 1063.94 1067.66 1095.67
1098.48 1100.76 1109.87 1129.56 1144.64 1174.25
1177.25 1226.32 1247.19 1262.14 1283.59 1318.09
1372.83 1381.98 1405.76 1419.79 1424.99 1427.25
1427.86 1430.22 1437.58 1449.53 1454.42 1466.77
1467.88 1479.21 1484.05 1486.58 1487.27 1490.58
1493.89 1497.09 1500.18 1505.92 1508.00 1515.47
1524.22 1578.91 1581.70 1595.79 1604.56 1678.22
1720.29 2382.81 3035.59 3038.74 3039.63 3040.58
3043.03 3043.72 3096.68 3097.54 3099.90 3103.98
3118.91 3122.08 3136.33 3137.93 3143.43 3146.02
3148.80 3153.39 3161.83 3166.40 3192.25 3809.35
=====

```

```

5
=====
 20.58 28.65 57.70 78.15 100.30 111.15
114.52 127.43 128.95 136.54 138.77 145.08
149.75 158.92 173.87 183.14 214.23 239.04
256.03 271.04 285.93 293.83 299.40 302.14
326.66 379.46 401.00 421.32 428.29 463.66
468.03 524.72 537.94 542.13 562.73 588.66
601.56 612.07 619.77 643.60 661.18 709.38
791.02 808.54 810.79 813.10 869.73 961.15
963.49 968.26 973.08 980.97 1027.06 1044.54
1046.50 1047.90 1053.49 1056.92 1062.68 1071.59
1093.23 1097.42 1101.44 1129.25 1151.59 1172.52
1177.96 1231.80 1264.18 1316.26 1379.67 1386.10
1395.53 1402.47 1415.14 1427.15 1428.54 1438.04
1438.92 1439.80 1447.13 1458.45 1473.58 1474.70
1482.33 1485.61 1488.62 1491.54 1495.09 1497.91
1501.99 1503.83 1508.31 1512.52 1533.46 1550.84
1558.91 1584.38 1635.97 3031.33 3036.23 3037.79
3038.59 3042.74 3045.42 3101.16 3103.10 3104.39
3108.86 3111.85 3113.75 3132.38 3134.38 3141.85
3146.35 3147.73 3149.04 3172.96 3183.95 3206.26
=====

```

```

6
=====
 7.79 26.09 35.89 45.53 55.79 78.35
98.78 104.75 110.25 116.66 126.74 138.84
140.50 146.75 156.21 158.05 160.90 171.72
172.38 180.78 184.11 188.28 199.26 204.65
221.49 227.70 239.06 249.95 256.60 287.00
296.54 299.69 302.70 311.98 318.78 320.53
345.15 374.82 395.82 408.78 415.31 420.25
429.05 456.19 489.93 527.72 531.71 535.54
540.20 558.01 567.77 593.15 605.78 614.76
623.42 635.58 638.23 652.62 706.85 710.46
721.44 770.27 796.35 801.33 814.26 816.29
859.57 860.92 937.65 955.04 967.58 973.23

```

976.74 978.26 981.33 984.93 1003.20 1016.41  
1023.15 1038.30 1044.14 1047.96 1052.46 1053.73  
1058.37 1060.47 1061.47 1064.31 1071.72 1098.32  
1100.96 1102.41 1112.83 1131.68 1139.58 1178.44  
1178.82 1197.00 1213.86 1242.07 1268.92 1275.02  
1292.63 1331.88 1362.54 1367.83 1382.85 1390.31  
1399.95 1412.59 1419.25 1424.41 1426.58 1433.65  
1434.61 1438.46 1459.36 1461.74 1468.13 1479.24  
1482.37 1482.78 1483.49 1485.32 1489.82 1491.95  
1492.64 1495.90 1500.14 1501.73 1508.91 1510.26  
1519.55 1526.56 1533.63 1570.06 1574.63 1590.42  
1625.94 1654.30 1663.63 2182.46 3030.90 3036.00  
3038.16 3039.68 3040.72 3044.62 3047.09 3093.61  
3096.68 3099.65 3102.70 3118.37 3118.44 3121.98  
3132.26 3133.65 3137.44 3138.82 3145.07 3151.89  
3155.36 3170.38 3171.37 3180.12 3191.19 3194.16  
3204.01 3222.69 3229.22

=====

6-TS

=====

-281.08 19.34 23.46 46.51 49.62 57.45  
61.69 74.16 82.93 114.62 119.57 134.04  
141.07 142.45 143.40 156.64 159.71 167.61  
174.50 178.58 184.63 191.78 197.50 214.12  
218.24 225.62 243.57 254.22 267.98 278.36  
297.07 303.55 305.12 315.19 320.27 346.90  
357.35 394.33 402.29 409.57 416.52 419.94  
450.10 468.33 503.72 537.30 537.67 552.19  
560.86 567.05 587.54 591.27 605.50 616.39  
620.03 634.28 643.31 645.07 699.03 714.22  
749.04 779.55 794.26 799.62 812.70 815.79  
852.09 871.29 941.49 955.09 963.45 971.53  
973.63 976.25 980.34 987.53 996.01 1014.18  
1019.08 1040.32 1043.36 1049.45 1051.97 1057.20  
1059.13 1061.45 1062.25 1062.87 1068.22 1093.58  
1096.83 1101.22 1110.95 1130.60 1136.95 1174.09  
1182.60 1195.44 1214.58 1235.41 1256.73 1277.37  
1304.81 1329.23 1363.87 1372.98 1386.60 1399.54  
1403.40 1412.59 1420.75 1426.90 1428.20 1434.58  
1438.55 1439.77 1450.58 1463.61 1472.40 1474.25  
1477.59 1480.63 1482.96 1484.77 1486.60 1488.62  
1492.17 1492.94 1497.51 1499.11 1507.66 1511.44  
1517.91 1531.39 1532.64 1557.10 1567.35 1580.76  
1624.36 1641.53 1653.94 1981.89 3033.79 3034.21  
3035.26 3036.93 3038.72 3041.99 3042.23 3098.68  
3100.89 3102.83 3102.89 3110.50 3112.93 3118.48  
3124.86 3135.97 3139.81 3141.08 3141.10 3146.39  
3151.34 3165.24 3173.32 3176.04 3184.05 3194.56  
3197.35 3204.48 3215.72

=====

7

=====

25.41 41.78 51.55 57.92 63.83 75.98  
84.22 98.15 105.25 126.80 132.12 135.83  
143.56 149.66 153.90 159.11 170.56 175.08  
179.46 189.18 190.69 197.61 199.17 207.11  
210.94 221.38 241.29 254.41 264.23 294.92  
296.33 303.60 309.77 315.76 357.76 371.99

397.74 403.96 419.59 428.83 435.13 483.12  
509.80 530.71 535.10 538.40 552.14 566.68  
576.62 583.40 588.94 614.24 614.84 620.30  
630.35 640.01 661.24 689.83 718.51 745.58  
773.04 793.42 798.89 810.33 812.02 854.72  
871.04 879.37 940.39 964.26 969.68 971.66  
972.83 980.60 983.53 1003.48 1012.54 1013.50  
1043.45 1045.94 1051.14 1054.10 1055.93 1056.77  
1059.46 1062.31 1063.29 1069.86 1089.95 1097.92  
1104.15 1108.23 1131.08 1141.03 1175.39 1178.76  
1193.57 1212.11 1226.21 1260.33 1273.97 1297.15  
1327.29 1333.37 1361.33 1378.86 1383.88 1385.46  
1408.91 1413.17 1419.43 1426.36 1428.73 1434.03  
1438.44 1445.40 1451.07 1469.58 1476.12 1480.38  
1482.85 1483.77 1486.82 1490.79 1491.29 1491.74  
1493.15 1496.70 1498.99 1499.93 1506.90 1508.96  
1517.95 1527.14 1530.23 1561.54 1579.96 1616.74  
1622.88 1651.57 1652.92 1738.23 3020.29 3031.77  
3033.16 3035.88 3037.48 3038.44 3048.84 3075.03  
3095.97 3096.93 3107.50 3110.00 3114.17 3115.19  
3124.33 3137.77 3140.75 3142.12 3144.28 3147.55  
3151.22 3162.77 3170.08 3177.37 3180.65 3189.23  
3198.93 3204.59 3205.29

=====

7-TS

=====

-261.77 27.91 45.64 60.25 62.23 67.96  
80.24 84.96 93.91 103.43 107.34 126.50  
131.87 139.01 140.42 148.81 155.18 165.73  
174.51 179.39 182.37 183.84 201.85 209.08  
217.64 229.66 244.64 253.03 283.24 293.91  
298.64 302.43 307.99 316.48 361.83 368.50  
396.91 409.04 420.35 422.90 449.94 475.89  
492.40 512.71 531.93 535.56 540.35 555.49  
567.77 580.83 589.13 596.63 612.87 619.52  
624.43 642.95 648.24 666.42 715.64 726.79  
759.72 776.64 797.31 810.11 813.59 823.66  
872.72 878.76 942.03 949.53 958.75 968.53  
973.45 974.88 983.19 1000.61 1009.89 1013.45  
1038.35 1048.48 1050.55 1052.75 1053.08 1057.08  
1060.48 1063.08 1068.21 1070.14 1099.82 1103.18  
1108.33 1112.28 1131.14 1139.60 1174.53 1179.12  
1193.69 1217.21 1236.20 1246.64 1285.02 1293.27  
1315.13 1327.16 1362.90 1376.94 1382.42 1386.46  
1414.35 1416.08 1419.36 1427.04 1430.05 1434.89  
1437.56 1440.70 1449.29 1473.04 1478.77 1482.72  
1483.11 1484.74 1486.83 1490.15 1490.75 1492.39  
1495.89 1498.92 1500.08 1501.59 1505.77 1507.63  
1515.52 1529.10 1531.80 1579.76 1584.06 1619.78  
1627.95 1648.93 1656.95 1745.13 3021.92 3030.55  
3032.01 3035.20 3040.56 3041.52 3052.41 3075.86  
3089.96 3100.27 3112.74 3117.37 3119.08 3122.18  
3135.98 3142.36 3143.55 3145.84 3147.99 3155.50  
3157.86 3163.34 3168.50 3176.49 3177.14 3190.36  
3199.47 3207.41 3213.08

=====

8

=====

16.21 37.16 39.40 54.14 60.59 65.83  
68.42 84.99 94.56 117.54 123.82 128.22  
132.56 136.54 149.05 151.93 152.70 158.24  
166.76 178.40 185.59 201.28 210.88 233.24  
243.06 252.55 260.29 280.19 292.18 297.60  
301.94 316.97 318.82 332.68 359.80 383.94  
392.90 421.15 423.22 428.90 441.67 486.23  
501.57 533.40 538.14 544.05 563.73 566.40  
578.05 588.90 593.95 604.60 613.16 619.44  
626.30 646.71 669.79 706.12 721.48 763.15  
785.67 811.13 813.27 820.52 826.73 858.88  
871.83 876.47 939.52 953.84 967.71 973.72  
981.69 983.49 998.32 1004.33 1007.83 1012.70  
1025.55 1050.75 1051.68 1052.75 1055.62 1057.82  
1060.28 1061.40 1066.78 1073.50 1098.26 1101.38  
1110.21 1116.31 1130.20 1156.20 1176.59 1179.28  
1193.73 1218.75 1235.40 1257.87 1289.92 1308.62  
1325.45 1329.36 1364.31 1383.85 1393.40 1394.22  
1419.52 1420.38 1425.72 1429.11 1435.18 1439.81  
1449.44 1452.01 1468.05 1474.86 1478.46 1481.83  
1484.21 1485.06 1487.14 1490.71 1491.61 1498.77  
1499.21 1505.21 1505.38 1507.95 1508.47 1515.27  
1528.58 1531.69 1535.38 1557.72 1569.75 1597.29  
1621.31 1624.26 1632.69 1651.50 3020.06 3029.61  
3030.71 3036.13 3036.15 3037.79 3052.58 3074.48  
3098.05 3098.81 3104.15 3106.36 3113.58 3122.26  
3136.56 3139.19 3140.01 3143.20 3151.12 3156.62  
3161.20 3167.90 3169.61 3176.39 3191.18 3191.36  
3199.00 3204.41 3207.73

=====

9

=====

21.93 29.74 33.40 38.52 59.56 68.31  
75.00 85.76 105.77 116.02 118.03 121.25  
133.23 143.03 148.57 155.81 164.90 176.08  
189.56 192.57 201.34 208.45 217.04 231.09  
244.23 261.55 278.26 283.15 301.80 302.85  
308.08 311.46 314.35 320.84 339.59 362.30  
386.94 403.92 416.27 419.76 421.71 441.07  
491.25 497.68 534.24 539.55 561.11 563.42  
589.74 592.38 593.70 603.70 605.99 616.93  
627.35 639.00 667.48 700.93 709.01 777.14  
785.60 799.74 814.27 815.01 818.06 854.03  
861.51 891.76 941.49 949.17 963.07 964.55  
973.86 986.64 987.64 997.57 1008.79 1015.42  
1032.59 1040.14 1050.51 1051.83 1052.37 1055.65  
1056.46 1060.90 1064.55 1066.00 1098.48 1099.76  
1112.83 1119.81 1132.08 1147.39 1176.03 1178.31  
1197.47 1208.92 1228.07 1235.13 1279.09 1317.14  
1335.36 1336.74 1366.78 1377.40 1394.79 1401.22  
1406.94 1408.50 1421.14 1426.96 1428.62 1437.85  
1440.75 1456.64 1459.28 1464.46 1465.89 1472.33  
1476.21 1483.21 1485.35 1486.60 1488.28 1493.40  
1494.12 1495.93 1501.84 1508.46 1509.88 1511.63  
1516.05 1519.23 1520.36 1546.55 1548.28 1605.81  
1617.93 1624.28 1646.12 1691.08 3022.50 3025.88  
3031.08 3031.94 3032.66 3034.89 3066.46 3091.28  
3093.97 3100.93 3102.02 3103.57 3106.80 3127.36

3132.69 3135.24 3140.44 3141.53 3144.11 3154.50  
3163.69 3180.23 3181.81 3190.97 3195.37 3202.85  
3212.15 3218.69 3221.44

=====

9-TS

=====

-211.99 23.26 33.31 42.42 50.86 61.50  
75.82 91.45 106.36 114.49 117.33 122.99  
129.18 132.18 141.00 146.11 148.35 160.93  
165.02 172.45 174.93 187.83 191.99 206.91  
229.36 243.77 251.61 265.43 277.23 283.92  
303.07 308.84 310.05 317.36 341.76 352.66  
381.22 402.31 416.25 417.75 422.80 425.06  
487.84 506.83 530.44 541.09 562.02 573.52  
583.76 587.97 590.00 597.75 606.44 618.24  
621.08 626.87 673.22 700.70 703.39 774.34  
785.70 798.63 810.34 813.88 814.30 835.04  
859.75 909.22 922.78 949.22 959.76 961.11  
972.55 983.06 990.58 999.34 1007.69 1015.42  
1025.16 1049.65 1050.53 1052.80 1055.78 1056.99  
1059.55 1061.53 1066.27 1067.23 1096.53 1100.01  
1100.53 1118.81 1130.59 1146.68 1168.95 1179.50  
1198.23 1208.52 1222.91 1251.13 1277.47 1320.04  
1341.07 1357.61 1368.24 1388.52 1389.99 1396.76  
1406.87 1412.90 1418.95 1425.26 1428.54 1434.85  
1438.74 1447.09 1453.03 1457.92 1465.44 1468.47  
1479.79 1484.91 1486.00 1486.93 1489.20 1490.25  
1495.64 1496.18 1500.29 1504.97 1510.55 1512.31  
1514.23 1519.55 1530.12 1543.76 1554.63 1609.76  
1622.61 1628.09 1649.45 1710.43 3013.06 3018.63  
3025.37 3030.47 3032.12 3033.24 3065.57 3077.09  
3089.68 3096.96 3098.50 3100.68 3106.71 3123.66  
3125.13 3127.30 3131.16 3139.17 3139.97 3142.07  
3167.42 3168.83 3179.48 3188.04 3191.08 3200.94  
3206.57 3209.10 3242.89

=====

10

=====

2.17 34.73 37.34 46.43 57.78 72.95  
74.95 93.27 95.43 108.66 110.98 126.41  
134.19 140.79 156.42 168.30 170.95 180.24  
184.42 195.70 203.34 216.95 220.19 234.68  
245.94 253.09 266.01 274.51 287.24 294.15  
301.20 304.47 306.04 311.76 340.27 363.50  
371.35 416.34 421.09 431.79 434.82 493.21  
510.56 520.75 536.91 547.56 560.14 578.62  
584.24 592.77 602.69 608.73 612.37 622.36  
632.87 666.54 688.23 723.02 751.06 775.79  
784.94 806.54 808.52 808.73 823.88 847.77  
870.00 926.79 945.84 957.95 964.94 965.76  
978.77 985.49 986.89 1004.71 1020.63 1035.78  
1046.91 1048.94 1051.53 1055.66 1060.68 1061.43  
1062.62 1066.40 1068.06 1086.04 1093.96 1096.25  
1102.57 1114.47 1126.46 1151.36 1161.53 1177.70  
1194.74 1217.26 1218.19 1249.42 1297.28 1330.35  
1332.49 1342.72 1363.06 1375.99 1381.72 1398.63  
1408.08 1410.77 1413.42 1421.18 1424.86 1428.87  
1430.77 1435.48 1443.16 1449.78 1460.16 1479.83

1482.41 1483.29 1484.14 1485.31 1488.47 1489.58  
1495.52 1497.29 1499.02 1501.49 1503.24 1505.15  
1516.12 1518.45 1538.84 1542.64 1582.56 1630.38  
1633.66 1639.21 1660.01 1763.46 3017.03 3018.26  
3026.62 3029.79 3030.54 3032.66 3071.31 3075.88  
3088.61 3091.34 3094.67 3098.89 3105.08 3124.43  
3131.14 3132.74 3137.18 3140.39 3142.44 3146.28  
3170.96 3174.30 3175.92 3180.67 3188.50 3192.52  
3201.40 3207.49 3256.90

=====  
2A  
=====

27.22 31.06 42.21 55.96 64.44 71.44  
85.12 94.58 97.68 107.43 116.64 119.42  
130.15 136.92 145.92 157.18 159.57 164.20  
174.60 180.19 185.85 197.15 213.47 224.68  
242.19 267.16 292.72 307.62 317.31 326.68  
327.71 346.72 400.34 427.71 438.08 444.93  
462.55 507.24 533.37 534.32 539.29 545.54  
567.13 581.86 591.87 599.11 602.63 613.58  
621.95 672.90 703.56 713.06 796.15 802.94  
811.17 814.24 822.07 879.64 930.43 971.18  
977.72 979.32 991.62 1004.09 1015.47 1042.77  
1044.41 1051.28 1052.65 1055.31 1056.23 1059.16  
1076.18 1102.46 1105.97 1132.79 1133.26 1179.27  
1181.60 1191.68 1208.69 1214.61 1288.54 1317.63  
1388.71 1396.21 1399.15 1406.97 1424.91 1426.26  
1427.63 1438.26 1443.32 1446.06 1447.32 1453.24  
1455.89 1470.83 1474.12 1477.71 1481.17 1484.53  
1487.60 1494.18 1495.97 1503.63 1510.49 1514.40  
1518.35 1527.14 1532.16 1569.36 1601.32 1634.95  
1795.46 3048.79 3049.76 3051.35 3054.07 3055.07  
3055.56 3118.48 3123.70 3125.89 3127.02 3130.59  
3131.90 3157.18 3159.12 3162.36 3163.32 3173.59  
3174.57 3179.22 3210.46 3222.17 3229.94 3788.73

=====  
2A'  
=====

21.47 30.96 55.59 59.85 69.65 77.30  
82.06 98.61 101.97 110.09 116.29 124.95  
132.73 137.17 138.40 142.94 154.02 155.18  
162.72 177.19 187.07 194.82 213.14 228.76  
243.51 267.95 296.17 310.39 317.73 325.41  
325.92 349.03 404.43 429.15 436.68 442.64  
450.80 512.93 530.22 532.56 536.41 553.32  
566.05 583.72 591.84 600.97 603.96 609.21  
627.48 673.33 703.57 714.52 800.57 804.89  
811.28 813.79 845.29 885.00 918.04 968.84  
979.28 979.96 992.41 996.74 1015.73 1044.17  
1045.31 1048.25 1049.43 1050.84 1052.97 1061.00  
1071.17 1102.61 1104.40 1131.75 1132.88 1177.76  
1180.34 1186.42 1186.55 1213.71 1293.89 1318.27  
1384.80 1394.82 1396.03 1398.82 1424.34 1425.80  
1427.58 1438.00 1439.00 1442.48 1446.72 1457.16  
1459.91 1472.24 1475.00 1476.91 1483.39 1484.63  
1490.06 1493.46 1498.73 1506.88 1509.80 1515.67  
1526.17 1530.77 1533.94 1569.78 1597.02 1618.16  
1818.37 3050.35 3050.69 3055.49 3055.58 3056.98

3060.98 3121.77 3124.66 3129.85 3131.64 3133.61  
3142.77 3152.86 3159.32 3164.25 3171.42 3175.57  
3179.56 3185.55 3211.30 3227.84 3248.41 3785.30

=====  
3A-TS  
=====

-1320.61 19.42 48.90 65.33 75.46 89.48  
97.01 99.95 101.88 104.49 110.83 114.94  
134.39 137.10 147.09 150.56 160.11 161.65  
173.81 185.08 191.72 198.97 217.02 225.82  
231.60 249.78 281.81 301.13 308.02 316.55  
319.16 322.47 395.72 409.98 430.21 437.31  
448.08 467.45 486.90 531.35 537.36 563.84  
565.25 577.71 592.31 599.55 604.73 607.45  
622.44 649.90 690.75 703.11 776.91 798.46  
809.85 812.00 815.12 823.50 951.39 968.77  
975.98 978.80 995.56 1008.28 1028.07 1042.53  
1044.42 1045.86 1049.44 1051.49 1056.79 1061.47  
1071.35 1101.64 1103.39 1132.16 1146.84 1178.21  
1181.45 1203.63 1234.96 1261.70 1274.65 1335.44  
1374.58 1398.61 1399.32 1400.30 1423.29 1423.60  
1425.25 1427.09 1437.44 1441.95 1448.96 1451.72  
1455.12 1455.81 1460.04 1475.21 1478.43 1485.27  
1489.65 1489.96 1494.16 1499.84 1506.28 1509.82  
1511.86 1516.07 1522.67 1524.84 1535.98 1562.27  
1599.20 1691.32 3049.10 3052.39 3053.67 3054.79  
3056.14 3058.12 3122.31 3123.31 3126.89 3129.27  
3131.90 3132.90 3154.40 3160.81 3162.03 3164.33  
3168.32 3171.98 3183.07 3189.05 3213.19 3790.82

=====  
4A  
=====

26.48 34.95 43.94 60.61 69.93 76.03  
83.45 103.27 116.23 126.50 129.09 134.58  
138.22 147.12 149.90 156.05 160.02 170.27  
172.18 187.09 195.06 203.37 224.69 247.10  
258.68 260.28 292.78 296.06 300.26 314.04  
315.66 378.73 382.23 424.84 431.67 450.38  
476.46 502.47 530.08 535.50 556.33 567.00  
567.41 579.47 594.13 613.17 617.59 623.25  
628.62 654.78 667.50 778.34 786.25 798.04  
807.91 809.54 830.10 876.45 955.68 960.32  
968.28 969.62 1002.72 1013.66 1029.36 1042.04  
1045.28 1048.09 1054.34 1054.93 1056.84 1061.63  
1062.62 1096.01 1101.75 1129.27 1159.35 1173.73  
1177.70 1219.05 1228.34 1277.48 1317.32 1370.97  
1372.67 1380.79 1384.39 1407.98 1416.54 1421.23  
1425.96 1429.31 1432.67 1437.65 1451.14 1453.12  
1461.68 1468.60 1476.65 1478.42 1482.14 1486.96  
1491.53 1492.93 1495.13 1502.93 1505.95 1516.13  
1521.83 1525.71 1540.87 1577.70 1591.10 1619.40  
1713.72 3048.09 3049.10 3050.37 3053.51 3055.08  
3055.79 3109.67 3113.43 3117.48 3121.53 3126.94  
3127.60 3148.43 3151.94 3155.16 3158.53 3158.95  
3176.72 3177.11 3192.00 3213.86 3239.60 3803.00

=====  
5A  
=====

27.79 32.54 58.01 68.20 79.11 100.20  
111.02 115.03 125.76 137.46 142.71 148.46  
153.81 157.06 173.59 184.72 200.31 231.54  
244.91 249.66 290.97 296.10 300.41 305.23  
320.48 379.57 392.67 413.34 443.88 451.58  
462.82 498.29 524.44 535.61 566.58 585.09  
589.02 605.49 613.56 615.62 642.02 672.79  
767.77 796.42 809.57 810.22 830.48 953.20  
959.83 966.10 967.55 1002.76 1006.61 1032.46  
1033.22 1037.77 1043.88 1049.33 1055.11 1060.55  
1062.21 1095.42 1102.08 1127.85 1156.44 1170.97  
1177.66 1214.97 1275.05 1305.08 1371.69 1382.07  
1391.60 1405.46 1406.84 1425.29 1426.63 1431.09  
1434.15 1436.15 1440.25 1449.49 1467.12 1467.52  
1474.10 1479.05 1482.86 1489.57 1492.09 1494.15  
1496.62 1500.44 1500.93 1510.32 1513.92 1519.17  
1536.75 1579.23 1606.78 3043.06 3046.67 3049.25  
3052.70 3055.35 3058.77 3107.67 3113.52 3117.17  
3120.16 3124.11 3125.94 3150.91 3155.69 3156.47  
3158.99 3161.87 3174.49 3178.00 3201.83 3217.51

6A

10.21 16.18 31.33 37.86 55.54 56.29  
59.21 79.27 98.16 103.16 106.03 124.78  
128.79 151.12 155.53 157.69 162.85 166.32  
172.14 176.85 185.50 192.23 196.34 198.65  
208.84 219.44 230.84 247.43 253.89 261.82  
280.77 293.84 300.71 306.73 313.48 319.12  
357.55 374.27 399.97 408.05 409.76 423.36  
431.91 452.49 461.48 509.13 514.54 533.22  
536.30 540.25 568.38 590.94 594.21 606.20  
614.70 624.06 633.50 643.30 699.34 700.70  
721.91 776.96 782.83 795.76 812.84 814.95  
852.49 854.52 939.58 958.08 966.83 969.41  
974.07 981.01 981.23 1000.68 1015.21 1015.66  
1016.95 1030.24 1039.66 1044.16 1048.38 1048.70  
1056.14 1056.43 1056.97 1061.12 1068.13 1071.27  
1095.95 1102.66 1114.78 1130.99 1160.57 1174.48  
1177.97 1202.89 1213.60 1219.70 1271.27 1272.30  
1319.65 1333.49 1364.20 1377.89 1383.72 1390.79  
1406.35 1413.73 1418.69 1426.22 1428.28 1433.56  
1435.40 1442.53 1448.51 1455.34 1465.33 1474.66  
1475.74 1481.33 1483.25 1484.16 1486.84 1489.57  
1492.46 1493.08 1496.07 1499.29 1504.94 1508.74  
1515.10 1522.03 1525.02 1528.50 1530.85 1577.18  
1612.89 1622.51 1649.42 2176.71 3042.65 3046.26  
3048.15 3050.05 3052.78 3053.17 3061.70 3108.56  
3109.63 3110.49 3119.79 3120.75 3130.28 3130.92  
3144.81 3146.78 3150.47 3151.76 3152.89 3155.28  
3167.06 3182.99 3193.41 3200.84 3202.88 3211.68  
3217.66 3221.20 3230.90

6A-TS

-287.00 28.12 29.49 53.00 56.71 62.42  
68.80 81.69 93.71 105.99 120.20 122.85  
128.88 138.72 140.80 152.88 154.47 163.33

167.32 172.34 179.83 187.27 193.58 203.06  
213.59 214.73 240.44 242.48 262.81 271.00  
293.64 304.57 308.84 311.86 319.45 341.54  
375.99 392.69 399.50 410.23 415.76 426.21  
440.29 469.53 507.12 521.85 530.81 532.27  
550.01 564.39 567.17 581.66 592.14 607.99  
610.04 615.97 633.74 636.86 688.57 711.12  
739.28 779.37 785.89 799.39 812.19 814.49  
838.20 871.91 948.77 953.66 962.91 965.85  
971.15 975.27 990.18 998.14 1001.01 1014.15  
1020.82 1032.66 1039.97 1041.77 1044.00 1047.55  
1050.70 1057.61 1058.32 1059.69 1062.16 1065.16  
1097.42 1101.83 1116.07 1130.64 1152.25 1172.17  
1176.90 1202.47 1216.56 1217.79 1250.71 1271.20  
1331.51 1337.07 1365.58 1379.57 1390.12 1396.84  
1410.32 1414.30 1420.17 1426.46 1429.13 1433.85  
1438.44 1442.85 1444.09 1447.72 1457.13 1468.20  
1474.30 1480.15 1482.25 1484.64 1485.29 1486.26  
1488.42 1488.61 1494.61 1495.45 1504.44 1508.07  
1515.07 1521.17 1526.06 1529.00 1539.23 1545.78  
1619.36 1622.44 1648.24 1959.14 3046.64 3047.91  
3048.14 3049.78 3051.10 3052.16 3053.83 3113.74  
3114.11 3119.71 3120.54 3123.13 3125.07 3127.42  
3134.23 3146.09 3153.45 3155.19 3156.92 3161.62  
3170.00 3180.91 3190.63 3196.21 3196.25 3205.99  
3216.11 3216.50 3226.15

6A-TS'

-335.84 20.19 30.37 44.88 55.85 61.22  
63.15 82.34 93.93 103.27 117.23 127.40  
129.32 135.99 140.63 146.90 151.36 157.16  
162.71 169.90 175.51 184.54 190.27 198.80  
202.02 221.18 226.45 240.18 257.69 259.73  
298.05 305.57 308.90 311.76 314.26 334.65  
358.28 391.54 398.01 405.71 412.39 415.24  
427.65 463.54 482.06 525.07 528.75 534.67  
542.28 557.21 565.93 578.43 591.89 612.36  
616.89 622.57 630.68 642.51 696.15 698.14  
738.20 778.54 784.80 797.41 811.92 814.30  
844.37 858.03 938.20 952.14 960.67 964.37  
973.37 980.89 986.96 988.01 994.90 1014.72  
1021.20 1033.78 1040.81 1042.35 1045.24 1045.39  
1047.99 1050.43 1055.93 1057.59 1061.33 1071.77  
1097.42 1100.06 1118.16 1131.12 1148.45 1171.01  
1175.10 1204.25 1213.02 1220.48 1245.07 1271.21  
1336.26 1336.47 1351.49 1368.09 1386.88 1392.89  
1406.24 1406.89 1422.07 1425.35 1427.70 1434.58  
1437.08 1439.67 1446.51 1448.27 1460.79 1471.52  
1475.42 1477.24 1482.35 1483.37 1484.59 1486.08  
1488.26 1491.29 1498.74 1500.44 1509.67 1511.45  
1511.79 1518.12 1520.29 1525.50 1536.78 1547.60  
1611.59 1621.42 1645.36 1915.64 3043.91 3045.34  
3046.62 3050.33 3052.03 3052.62 3062.37 3104.98  
3114.15 3118.64 3118.86 3120.31 3124.24 3133.60  
3139.77 3148.47 3151.33 3152.68 3161.48 3161.94  
3164.83 3170.09 3194.81 3197.61 3202.76 3209.97  
3216.34 3216.49 3222.51



```

=====
7A
=====
 20.13  34.76  47.81  63.12  69.76  75.83
 86.22  97.76 110.25 123.90 130.28 132.40
135.30 145.33 153.65 153.92 163.70 172.55
175.81 177.26 183.28 190.88 205.36 208.37
211.61 222.55 228.92 252.15 272.98 293.86
298.70 304.04 312.31 313.41 356.10 368.41
405.80 409.79 414.54 419.29 442.54 470.55
499.24 522.38 528.36 532.90 542.81 567.12
572.72 580.93 589.96 603.56 605.29 607.55
627.81 631.36 648.80 674.87 708.17 735.89
774.48 796.44 803.61 811.56 813.97 823.71
859.64 870.33 955.53 958.35 968.34 972.32
987.88 992.66 998.51 1001.26 1010.35 1021.45
1029.21 1039.10 1040.14 1044.58 1045.55 1050.51
1051.99 1054.96 1059.49 1064.35 1084.33 1096.02
1104.80 1113.33 1131.65 1146.47 1172.86 1175.99
1201.31 1208.42 1223.27 1249.10 1278.67 1302.56
1311.41 1330.68 1365.92 1368.07 1385.94 1392.63
1401.96 1413.67 1419.95 1426.06 1427.99 1433.37
1437.05 1438.47 1446.06 1458.84 1467.30 1473.01
1476.06 1477.86 1479.20 1483.59 1486.28 1487.14
1488.81 1489.99 1493.39 1494.93 1504.30 1506.22
1516.49 1519.01 1525.65 1544.07 1553.81 1608.70
1622.90 1636.16 1644.95 1670.19 3037.45 3045.40
3046.39 3048.66 3049.25 3051.43 3057.35 3104.55
3108.14 3110.53 3118.57 3120.31 3123.49 3128.64
3149.14 3154.04 3156.19 3159.94 3161.80 3165.85
3167.89 3174.91 3190.45 3194.21 3195.77 3203.04
3209.21 3217.71 3218.86
=====

```

```

=====
7A'
=====
 23.86  30.75  49.33  57.37  74.83  76.63
 84.62  94.42 114.11 116.01 123.16 128.31
138.22 140.00 153.51 162.41 164.77 169.34
172.51 180.23 193.16 196.57 204.32 209.19
213.46 220.88 263.71 277.40 282.96 294.65
306.13 312.84 315.59 327.07 361.35 372.70
388.40 409.63 411.03 415.00 420.38 445.60
488.03 504.81 527.31 532.45 534.93 566.80
577.95 584.69 592.00 607.49 611.82 615.56
623.01 637.53 661.29 684.29 699.41 722.49
778.40 791.35 803.44 812.02 814.08 838.66
852.24 904.96 952.54 962.48 967.69 972.00
982.93 988.76 991.19 1000.87 1001.27 1010.79
1020.18 1040.34 1042.21 1044.66 1045.65 1051.95
1054.46 1061.11 1063.27 1067.03 1094.01 1099.09
1106.31 1123.90 1131.81 1137.48 1174.54 1177.77
1194.71 1205.45 1225.05 1236.96 1288.59 1301.16
1342.20 1349.14 1376.32 1381.99 1386.91 1390.81
1398.39 1412.54 1421.22 1424.17 1428.49 1436.92
1438.49 1446.42 1451.01 1456.84 1461.04 1466.16
1470.96 1474.21 1481.40 1484.55 1486.61 1487.85
1492.53 1494.37 1495.98 1501.64 1504.42 1505.99
1516.81 1519.25 1524.37 1530.81 1537.80 1555.29

```

```

1605.61 1611.84 1639.40 1644.76 3028.70 3043.03
3046.29 3047.09 3048.05 3049.78 3058.26 3097.32
3108.54 3111.58 3116.23 3117.56 3119.79 3121.08
3125.84 3148.38 3151.63 3153.32 3155.05 3159.49
3161.43 3176.38 3195.56 3196.47 3203.81 3211.90
3219.94 3220.68 3228.85
=====
7A-TS
=====
 -62.67  25.22  45.76  55.49  58.75  64.96
 76.36  81.40  93.30  96.93 112.50 117.25
135.24 137.65 140.43 147.16 150.68 153.02
156.57 172.08 179.31 182.08 200.60 201.97
211.11 214.30 239.53 256.95 283.19 291.43
296.45 303.23 312.72 318.45 347.68 375.27
385.28 411.74 414.66 418.24 446.35 470.21
487.46 518.18 526.81 534.01 544.79 557.45
568.02 574.68 588.98 591.68 609.20 616.22
623.28 639.75 652.46 669.41 715.37 731.58
764.87 784.71 802.07 809.72 812.35 826.77
874.73 882.43 957.71 961.15 967.50 970.77
972.21 990.60 996.20 997.52 1010.39 1019.34
1033.03 1037.69 1041.43 1044.41 1050.24 1052.06
1055.51 1058.89 1062.83 1064.50 1081.96 1096.99
1104.22 1119.66 1130.22 1157.76 1171.83 1179.61
1201.95 1216.38 1222.39 1244.35 1283.80 1325.80
1336.69 1353.71 1368.39 1372.72 1381.01 1401.62
1409.05 1415.26 1421.79 1427.94 1429.39 1434.23
1436.41 1441.06 1448.62 1467.35 1470.94 1477.73
1479.59 1480.44 1481.92 1483.81 1487.52 1489.52
1491.00 1495.02 1496.08 1500.80 1501.05 1501.85
1513.25 1515.10 1532.19 1534.51 1536.05 1584.05
1612.56 1620.07 1640.84 1687.93 3036.93 3040.74
3045.82 3047.56 3051.35 3051.97 3064.34 3106.80
3108.15 3112.47 3118.00 3121.62 3124.64 3134.39
3151.60 3152.56 3152.77 3157.93 3158.62 3163.37
3169.36 3175.13 3188.70 3195.03 3204.51 3205.61
3211.08 3216.49 3224.15
=====

```

```

=====
8A
=====
 13.81  33.96  44.61  47.88  51.87  59.94
 72.22  78.36  93.95 100.07 113.21 122.61
126.71 130.25 144.58 152.11 160.20 162.10
173.11 176.03 184.13 190.77 208.23 213.86
235.09 237.75 255.27 276.74 291.22 301.26
309.93 311.89 316.32 320.55 356.60 367.25
396.34 407.11 418.04 428.25 437.95 478.16
492.68 525.86 529.44 531.43 548.81 566.72
572.91 579.76 590.77 591.33 608.42 611.85
614.72 632.45 664.25 698.32 714.68 765.30
785.02 812.48 815.81 818.88 830.19 839.11
871.26 872.14 958.76 964.12 972.15 973.08
997.96 1002.74 1003.90 1009.90 1015.67 1018.89
1031.66 1036.82 1041.33 1046.66 1047.07 1049.57
1052.93 1054.12 1062.92 1072.27 1097.90 1101.74
1113.01 1116.36 1132.22 1161.19 1171.28 1174.30
1201.62 1214.88 1234.95 1257.63 1298.72 1315.42

```

1324.14 1334.94 1370.07 1387.45 1396.23 1404.14  
1420.30 1422.51 1425.02 1428.91 1437.83 1440.25  
1444.33 1448.47 1452.82 1453.80 1462.42 1474.22  
1478.32 1483.98 1486.96 1488.94 1490.85 1494.99  
1496.15 1499.44 1500.87 1504.12 1506.27 1512.86  
1516.57 1518.37 1519.59 1535.27 1577.04 1601.88  
1605.55 1632.40 1633.71 1672.70 3038.95 3041.47  
3046.56 3047.84 3048.33 3048.96 3058.06 3100.30  
3114.07 3114.46 3115.16 3121.92 3126.24 3135.00  
3147.68 3153.30 3158.97 3160.47 3161.08 3163.58  
3173.36 3186.70 3191.58 3197.88 3205.65 3206.18  
3213.86 3218.86 3222.74

=====  
8A-TS

=====  
-221.61 24.47 36.77 38.00 48.37 60.37  
66.61 89.62 93.27 107.75 112.84 120.57  
125.92 134.08 134.79 140.75 145.04 148.08  
153.34 160.55 163.62 169.55 177.03 197.67  
218.21 222.39 246.89 264.81 275.37 290.11  
302.30 306.61 313.68 314.82 334.85 381.74  
396.17 412.06 417.26 422.32 429.64 444.81  
491.11 521.14 525.71 534.31 560.86 565.28  
568.21 582.97 587.66 587.96 603.10 614.21  
615.82 628.72 659.27 691.12 698.43 756.50  
781.77 805.75 808.68 811.16 820.49 832.35  
844.58 856.73 958.12 961.62 965.38 967.68  
986.58 988.99 994.50 1007.44 1013.20 1021.93  
1027.41 1029.59 1043.89 1046.11 1048.12 1052.88  
1054.57 1055.88 1061.64 1065.12 1096.64 1099.46  
1100.90 1119.99 1128.61 1159.38 1171.97 1175.17  
1201.69 1205.87 1223.06 1258.34 1297.80 1331.65  
1341.72 1345.54 1369.93 1375.14 1385.86 1391.58  
1403.25 1416.96 1420.73 1425.51 1427.59 1430.01  
1437.14 1439.51 1447.88 1458.21 1461.09 1471.33  
1479.14 1480.40 1482.48 1484.30 1486.52 1489.11  
1490.80 1494.77 1495.70 1499.18 1502.81 1505.37  
1515.30 1516.64 1522.31 1524.70 1554.91 1592.50  
1606.11 1612.87 1616.79 1644.80 3027.76 3045.22  
3045.63 3047.15 3048.25 3049.09 3056.64 3080.57  
3107.63 3111.98 3114.69 3116.95 3118.49 3131.68  
3142.81 3146.59 3148.56 3150.15 3153.92 3153.95  
3181.34 3189.19 3192.16 3197.37 3202.00 3204.47  
3212.04 3219.11 3223.22

=====  
9A

=====  
28.30 34.50 41.71 48.90 58.91 70.29  
83.03 89.92 103.47 107.37 114.09 124.83  
133.71 138.66 147.16 147.49 160.87 167.64  
173.49 175.61 182.79 192.87 201.15 219.73  
227.87 240.11 251.05 264.92 280.59 288.82  
294.00 304.77 308.86 313.67 361.78 369.60  
380.25 393.29 423.25 424.58 427.11 460.99  
488.50 496.34 535.12 545.57 559.70 563.17  
572.30 578.25 587.40 596.69 607.81 611.95  
627.44 651.10 673.88 701.49 719.49 764.90  
772.87 806.88 811.32 812.24 813.16 840.09

870.18 951.27 955.53 955.92 963.74 976.87  
990.72 993.88 995.55 1016.27 1020.47 1034.27  
1040.34 1040.65 1043.81 1048.18 1052.07 1057.23  
1062.94 1067.11 1071.58 1096.42 1100.03 1103.61  
1114.78 1130.11 1132.94 1152.06 1162.07 1175.54  
1199.51 1203.52 1224.43 1242.80 1292.95 1319.18  
1338.69 1360.38 1367.81 1383.98 1385.01 1400.39  
1407.83 1419.66 1422.48 1424.96 1428.26 1432.46  
1435.18 1437.50 1450.23 1452.57 1466.85 1469.18  
1473.95 1475.50 1482.90 1485.81 1489.61 1491.09  
1493.31 1495.59 1500.22 1506.43 1506.88 1507.45  
1514.88 1521.50 1523.42 1538.54 1548.50 1620.76  
1627.11 1633.58 1657.65 1832.11 3040.16 3043.33  
3044.78 3046.46 3047.12 3049.01 3058.52 3109.06  
3109.17 3111.36 3112.59 3115.04 3119.28 3131.40  
3140.06 3146.71 3146.98 3149.56 3149.79 3157.44  
3186.55 3189.91 3196.31 3198.74 3205.64 3206.77  
3215.74 3225.61 3276.56

=====  
1B

=====  
6.32 12.13 18.54 27.59 30.63 32.99  
42.41 45.59 52.18 64.12 70.40 77.85  
86.72 97.14 100.50 106.24 114.69 115.87  
119.58 122.21 126.50 129.19 136.15 139.97  
143.97 150.49 159.12 160.47 165.22 182.71  
189.15 195.64 204.54 210.71 225.89 238.63  
244.24 264.09 271.93 296.53 308.39 313.16  
316.65 327.25 329.65 356.03 372.91 394.43  
408.59 422.32 428.24 430.78 433.90 459.03  
526.95 533.01 534.36 538.17 564.84 566.65  
571.80 576.76 590.68 593.37 604.74 608.85  
613.26 625.57 634.00 645.70 660.68 697.53  
703.65 710.17 752.40 757.89 794.58 796.51  
809.06 810.81 811.55 863.72 877.04 890.63  
895.01 971.01 971.98 977.58 986.42 991.91  
1004.95 1012.28 1015.52 1018.36 1030.87 1035.21  
1043.88 1047.92 1050.62 1052.77 1054.04 1055.41  
1057.01 1057.64 1059.49 1089.22 1090.17 1103.06  
1105.74 1133.66 1144.43 1147.50 1178.14 1180.87  
1195.14 1201.94 1229.66 1267.58 1275.12 1275.48  
1299.67 1328.67 1335.84 1369.31 1391.67 1396.15  
1397.03 1413.89 1419.41 1420.88 1426.31 1433.45  
1435.83 1438.64 1441.44 1451.28 1457.61 1459.24  
1466.55 1467.75 1470.93 1474.88 1478.39 1489.77  
1492.78 1497.43 1497.61 1500.01 1500.55 1507.33  
1509.58 1513.77 1518.59 1524.15 1533.62 1537.16  
1565.74 1584.66 1627.45 1644.74 1657.48 1661.24  
1710.89 1770.61 3044.81 3046.05 3046.67 3049.36  
3050.18 3053.16 3055.64 3116.04 3116.83 3117.55  
3118.64 3121.03 3124.34 3131.11 3141.74 3145.99  
3153.98 3163.84 3167.61 3172.71 3180.12 3190.98  
3195.13 3199.62 3205.76 3211.34 3214.74 3230.00  
3230.87 3623.93 3802.08

=====  
3B

=====  
11.41 14.76 20.91 24.48 26.71 32.73

38.55 51.61 58.85 62.60 72.63 73.96  
77.77 88.70 95.32 96.84 106.00 110.23  
113.82 115.81 120.28 126.96 132.15 136.26  
142.09 143.81 153.02 163.52 176.87 186.22  
193.67 196.81 202.63 213.41 217.02 229.80  
233.22 238.89 255.60 281.30 291.50 299.24  
313.07 317.84 323.31 354.73 373.30 399.60  
403.99 422.60 427.31 429.95 444.93 466.54  
524.89 529.38 529.87 532.16 539.14 567.90  
567.95 589.34 590.70 593.92 603.83 606.05  
617.68 621.39 623.90 635.84 645.56 686.19  
697.55 706.01 752.63 774.71 795.24 796.74  
804.08 812.80 815.09 865.46 883.50 890.89  
958.48 969.26 969.78 977.94 979.82 992.25  
1003.48 1006.92 1017.17 1019.99 1029.75 1030.47  
1046.77 1048.73 1050.37 1051.52 1055.94 1056.92  
1056.98 1064.45 1073.07 1080.09 1089.18 1103.13  
1104.81 1124.64 1133.91 1145.08 1178.83 1181.30  
1194.02 1200.20 1210.36 1267.31 1278.29 1304.27  
1306.94 1331.72 1341.24 1359.12 1372.59 1392.70  
1396.45 1398.74 1412.59 1418.06 1424.02 1427.23  
1436.92 1441.50 1449.74 1451.39 1456.22 1459.15  
1459.42 1465.67 1476.09 1476.58 1481.07 1486.11  
1489.72 1495.62 1497.39 1498.23 1499.93 1504.67  
1507.50 1511.65 1514.76 1521.25 1529.35 1534.65  
1548.51 1566.14 1595.76 1627.70 1645.93 1660.33  
1767.06 1771.18 3046.74 3048.17 3050.18 3052.98  
3054.25 3054.47 3058.08 3075.19 3114.71 3121.89  
3122.05 3123.11 3125.24 3127.28 3134.06 3152.90  
3154.96 3155.85 3156.71 3158.40 3162.48 3162.78  
3182.73 3193.65 3197.28 3200.15 3210.45 3219.13  
3227.16 3622.46 3808.56

3B-TS

-1361.89 18.66 26.27 27.09 38.97 45.22  
46.64 63.23 67.54 77.52 78.23 83.41  
89.78 94.48 98.89 99.26 107.25 121.97  
126.08 132.25 138.08 142.61 148.81 153.10  
155.87 160.59 162.76 168.19 171.53 175.33  
180.60 188.50 200.61 217.24 219.55 235.88  
253.09 254.88 264.82 277.15 289.11 296.95  
310.42 320.65 331.29 338.43 352.40 395.62  
397.05 411.69 428.58 430.75 437.26 454.01  
500.41 516.90 534.23 536.70 548.84 552.75  
557.67 562.89 570.96 592.25 601.95 606.03  
609.04 613.35 635.33 642.47 651.14 660.04  
691.36 699.18 719.98 752.37 789.45 795.91  
809.93 811.33 816.83 820.00 869.49 882.51  
896.79 963.69 969.87 981.95 982.94 985.21  
988.78 996.12 1020.16 1020.43 1025.48 1030.11  
1049.07 1050.18 1051.51 1056.08 1058.15 1059.81  
1061.00 1061.68 1064.52 1088.28 1093.28 1102.93  
1106.67 1135.88 1144.02 1145.44 1176.16 1182.20  
1200.90 1219.98 1241.49 1249.89 1265.63 1279.94  
1283.85 1312.62 1325.39 1353.62 1395.20 1397.22  
1400.88 1402.62 1412.30 1423.80 1426.48 1433.21  
1434.58 1443.19 1444.27 1453.22 1454.48 1459.28

1460.27 1464.35 1469.17 1471.41 1478.50 1482.02  
1490.56 1493.03 1496.90 1498.70 1500.09 1502.58  
1506.87 1508.94 1514.14 1518.17 1529.57 1532.96  
1539.22 1553.67 1566.94 1584.40 1624.82 1637.50  
1659.45 1718.33 1777.70 3039.80 3043.37 3044.76  
3047.08 3049.10 3054.08 3057.98 3106.02 3112.56  
3113.50 3118.28 3120.00 3127.18 3131.17 3143.06  
3146.62 3153.59 3156.19 3158.76 3159.47 3160.19  
3169.75 3175.11 3199.90 3211.79 3213.24 3216.17  
3233.80 3629.00 3796.45

4B

14.44 20.17 29.51 31.01 31.58 35.84  
40.92 57.41 64.60 69.01 72.48 78.81  
83.86 92.59 105.68 114.67 119.73 123.27  
131.81 136.85 137.32 147.18 147.66 154.00  
156.53 160.02 163.48 165.72 168.51 173.53  
187.24 196.84 202.48 208.38 225.09 241.81  
252.93 264.54 270.67 293.43 300.19 301.48  
309.78 321.54 330.29 350.16 373.83 393.07  
400.40 418.83 427.06 441.09 458.10 497.05  
517.90 533.61 539.38 552.58 559.14 565.16  
568.18 575.00 590.05 590.27 599.08 611.00  
617.34 628.06 643.04 651.08 663.36 675.05  
692.95 713.13 753.51 786.98 789.44 796.18  
806.24 809.54 814.11 868.92 872.92 895.66  
948.39 958.59 963.34 968.10 972.79 980.17  
981.19 986.64 1018.48 1019.11 1028.33 1045.44  
1047.56 1051.36 1052.56 1052.99 1057.03 1060.18  
1062.12 1063.78 1066.20 1089.55 1097.78 1101.16  
1102.84 1130.48 1145.20 1159.37 1175.14 1179.62  
1200.36 1236.81 1249.56 1251.81 1279.60 1281.19  
1295.21 1325.23 1351.79 1358.41 1378.37 1383.77  
1406.90 1407.59 1415.89 1421.57 1427.02 1428.93  
1432.65 1438.28 1441.47 1455.18 1458.16 1465.77  
1468.46 1476.73 1480.00 1482.47 1484.58 1486.65  
1489.29 1493.42 1495.26 1497.91 1500.62 1504.88  
1510.86 1515.05 1517.05 1523.18 1553.41 1574.08  
1580.46 1591.08 1609.87 1637.93 1649.76 1660.07  
1721.54 1792.76 2955.32 3039.40 3042.76 3043.34  
3045.78 3046.69 3049.82 3056.47 3100.69 3104.77  
3108.24 3111.57 3114.81 3122.25 3122.65 3141.00  
3144.67 3145.60 3151.59 3152.28 3157.89 3175.97  
3188.67 3199.50 3199.54 3210.93 3216.25 3217.36  
3233.77 3619.32 3805.50

5B

12.42 18.19 19.68 26.49 31.40 35.78  
48.28 49.23 60.02 62.21 67.61 70.98  
83.39 89.84 98.97 103.00 111.24 115.33  
133.84 137.90 139.84 147.24 149.71 152.29  
162.93 163.29 176.91 186.73 195.15 211.64  
239.39 244.04 280.46 288.44 290.22 294.20  
299.07 307.11 327.33 350.01 372.00 387.08  
407.68 418.79 422.16 440.84 464.14 478.59  
526.37 526.95 537.84 546.08 564.71 566.35

585.15 589.84 603.36 613.52 621.79 629.05  
640.61 644.41 668.79 696.77 721.17 751.61  
793.17 801.33 806.35 810.84 812.94 866.18  
885.53 889.97 966.02 967.83 968.53 969.49  
991.10 993.35 994.51 1014.14 1016.57 1025.89  
1037.75 1042.58 1043.73 1047.80 1052.14 1053.99  
1057.24 1063.29 1065.94 1087.16 1096.53 1102.71  
1104.73 1128.86 1144.20 1157.79 1172.72 1178.84  
1197.58 1239.71 1266.74 1273.40 1279.78 1315.78  
1328.15 1365.23 1378.56 1392.67 1398.91 1410.59  
1410.89 1415.17 1427.39 1429.20 1435.78 1439.21  
1443.39 1458.94 1459.55 1464.38 1471.49 1474.78  
1478.89 1479.15 1482.99 1483.25 1486.40 1493.04  
1495.48 1496.26 1498.99 1502.91 1503.55 1510.76  
1518.14 1536.85 1560.71 1565.72 1567.70 1580.91  
1627.82 1645.24 1658.00 1772.88 3037.69 3043.48  
3045.45 3049.24 3050.99 3052.57 3058.54 3108.03  
3110.47 3116.25 3116.54 3118.54 3118.78 3124.23  
3146.98 3148.25 3152.22 3154.24 3155.05 3162.25  
3164.30 3184.53 3192.88 3202.81 3203.06 3211.63  
3220.60 3228.35 3620.48

6B

5.43 9.62 15.91 21.24 23.99 27.53  
39.90 41.98 49.41 50.65 59.27 62.58  
64.55 76.02 82.50 90.05 98.35 108.93  
113.49 120.73 124.11 131.06 136.40 144.75  
150.31 152.38 156.58 158.32 163.97 166.24  
168.72 175.92 179.02 180.64 187.33 192.72  
201.93 219.70 229.34 242.17 253.63 258.64  
281.67 296.99 298.08 299.59 307.05 309.44  
319.98 324.44 348.47 364.58 386.67 392.11  
402.73 409.23 416.78 420.49 426.22 431.39  
464.51 499.63 517.62 520.18 532.43 538.66  
548.95 553.95 558.65 565.15 567.39 593.21  
612.96 613.61 619.39 623.58 634.52 636.02  
648.81 657.77 693.51 709.30 721.16 725.29  
752.83 779.04 790.28 793.80 809.99 812.16  
815.47 870.72 873.12 880.24 895.21 951.27  
958.84 964.94 966.47 973.82 980.38 982.69  
994.22 994.98 1001.10 1016.17 1017.19 1018.87  
1023.16 1026.10 1034.29 1040.02 1046.92 1047.73  
1050.58 1054.95 1055.99 1056.91 1057.82 1061.27  
1065.40 1066.68 1088.67 1097.37 1102.11 1106.19  
1115.10 1130.82 1144.49 1153.14 1177.90 1178.90  
1199.34 1199.93 1218.39 1250.04 1253.14 1267.46  
1276.02 1282.18 1298.96 1324.91 1334.22 1354.11  
1366.48 1384.17 1392.09 1409.42 1411.72 1414.89  
1420.00 1425.52 1425.75 1429.41 1437.00 1439.72  
1457.06 1458.41 1460.75 1464.42 1465.94 1475.77  
1477.75 1478.12 1482.80 1484.00 1484.44 1485.22  
1487.73 1491.87 1497.01 1498.89 1499.11 1502.12  
1504.05 1507.60 1515.60 1517.37 1526.11 1533.19  
1553.13 1565.35 1576.00 1596.77 1624.57 1638.91  
1640.71 1654.13 1659.56 1778.59 2179.64 3042.07  
3044.51 3045.93 3047.46 3047.77 3049.84 3050.23  
3054.54 3106.07 3109.05 3115.39 3115.77 3117.16

3119.61 3121.39 3123.43 3134.54 3136.88 3145.52  
3151.91 3155.48 3158.27 3170.97 3172.88 3173.61  
3184.51 3187.39 3191.39 3198.13 3201.64 3205.02  
3210.01 3212.29 3213.86 3230.96 3243.46 3627.68

6B-TS

-327.32 7.07 14.51 19.90 24.90 27.59  
38.92 40.99 41.58 46.49 51.89 54.18  
63.13 67.60 74.69 78.91 81.98 90.60  
95.93 100.11 108.95 120.86 124.08 135.04  
141.16 143.87 146.29 150.64 162.36 166.02  
173.90 176.90 182.19 190.16 194.57 198.21  
214.78 219.28 238.68 242.17 251.10 258.20  
264.11 283.58 301.69 303.07 309.75 317.77  
320.97 351.57 356.64 372.08 373.28 393.65  
402.83 409.86 415.90 423.30 425.64 454.58  
472.83 511.33 526.92 533.36 538.09 557.62  
558.84 565.83 566.88 590.31 591.96 603.35  
609.10 622.01 623.19 631.84 633.59 643.33  
650.06 651.17 696.44 707.81 713.45 752.98  
757.11 782.54 794.22 798.36 809.08 812.60  
813.83 870.63 870.76 874.08 887.93 945.90  
962.20 966.69 969.69 973.32 979.77 986.60  
989.97 990.94 991.66 1009.73 1012.77 1013.97  
1014.50 1014.91 1036.38 1036.82 1045.86 1047.10  
1051.07 1054.18 1057.01 1058.32 1058.68 1062.15  
1062.74 1063.18 1087.37 1097.15 1101.86 1102.68  
1113.35 1130.20 1145.05 1147.17 1173.30 1181.57  
1197.36 1199.44 1215.56 1241.60 1255.06 1264.96  
1277.96 1280.20 1304.94 1329.01 1330.67 1364.62  
1365.61 1382.36 1396.70 1402.24 1413.41 1415.29  
1416.16 1421.74 1427.70 1429.12 1437.97 1440.00  
1446.94 1456.42 1460.35 1461.52 1470.31 1475.85  
1475.93 1477.07 1477.58 1483.40 1483.92 1487.39  
1488.72 1489.90 1491.87 1495.54 1497.27 1500.59  
1506.04 1509.65 1514.52 1516.84 1530.69 1532.79  
1559.54 1562.17 1564.54 1581.26 1621.38 1625.86  
1646.03 1653.01 1656.93 1758.33 1933.46 3038.21  
3041.61 3042.71 3044.94 3047.53 3048.31 3055.89  
3062.21 3105.61 3108.97 3109.69 3114.31 3114.43  
3119.62 3120.04 3124.33 3137.48 3139.75 3141.82  
3146.42 3148.74 3152.63 3155.95 3158.04 3167.92  
3183.59 3189.16 3189.32 3190.14 3199.66 3206.99  
3210.61 3212.43 3213.38 3217.52 3227.86 3633.72

7B

11.30 14.40 16.83 25.54 27.30 35.43  
40.46 46.27 49.60 52.85 58.43 65.36  
65.63 69.63 84.63 87.82 95.75 97.59  
103.02 109.44 119.78 132.61 134.93 140.38  
146.41 147.67 154.27 155.39 161.24 180.39  
185.37 187.98 190.65 195.17 196.04 202.06  
207.67 219.01 232.90 238.24 244.48 254.15  
271.16 297.31 298.43 305.70 312.97 318.48  
356.48 363.85 374.44 375.21 399.01 412.47  
418.21 422.33 436.81 442.06 490.44 515.16

527.36 528.65 534.83 543.46 554.85 562.46  
566.84 579.79 587.06 589.02 599.09 614.30  
617.55 622.56 624.78 634.78 641.68 646.82  
663.15 696.60 697.29 719.96 752.46 755.90  
777.29 795.51 803.81 809.26 811.24 813.61  
867.55 871.32 876.37 891.44 893.45 945.57  
968.23 969.20 970.85 975.26 988.56 989.46  
996.03 1004.39 1006.83 1010.89 1013.54 1018.88  
1019.87 1032.82 1045.60 1046.86 1047.42 1049.59  
1053.43 1056.30 1058.83 1059.21 1063.18 1064.88  
1065.78 1089.63 1097.67 1100.31 1103.61 1110.33  
1130.72 1145.15 1145.95 1173.25 1178.31 1197.30  
1201.22 1213.01 1232.44 1261.70 1262.14 1274.58  
1276.06 1300.51 1315.46 1328.45 1331.20 1361.73  
1373.18 1376.34 1380.81 1402.96 1411.91 1414.59  
1415.69 1426.96 1428.84 1430.30 1432.99 1437.69  
1448.39 1457.43 1459.13 1467.04 1474.90 1478.13  
1480.28 1480.92 1481.50 1483.60 1489.42 1489.88  
1490.81 1492.52 1495.49 1496.21 1497.84 1500.12  
1506.38 1507.11 1516.08 1521.38 1525.74 1529.88  
1563.20 1564.22 1582.98 1588.25 1623.73 1627.76  
1645.03 1651.98 1661.96 1732.27 1773.03 3023.36  
3040.60 3041.21 3042.64 3044.06 3045.81 3056.66  
3058.33 3075.97 3099.70 3103.16 3113.05 3116.58  
3121.18 3127.10 3130.23 3136.61 3140.88 3145.58  
3147.00 3150.42 3152.99 3158.94 3162.57 3167.77  
3178.27 3183.19 3190.16 3193.37 3194.57 3196.17  
3201.68 3209.22 3211.85 3215.89 3229.87 3630.36
